# Supplementary material for: Mycobacterium meyganense sp. nov., Mycobacterium omidense sp. nov., and Mycobacterium seymarense sp. nov.: bioremediation-capable novel species from Iranian environmental samples.
Source: Research Square preprint supplement (doi:10.21203/rs.3.rs-8862259/v1), 2026-02-23
Supplement: Supplementary file 1 [file b3181f3b0d4419b6588f7257.xlsx]

## Sheet: Article Information
Article title	Mycobacterium meyganense sp. nov., Mycobacterium omidense sp. nov., and Mycobacterium seymarense sp. nov.: bioremediation-capable novel species from Iranian environmental samples.
Journal name	Antonie van Leeuwenhoek
Author names	Conor J Meehan1,2,3, Sari Cogneau3, Mahboobeh Behruznia1, Maren Diels3, Leen Rigouts3,4, Hasan Shojaei5, Davood Azadi5
Affiliations	1. Department of Biosciences, Nottingham Trent University, UK; 2. Unit of Mycobacteriology, Department of Biomedical Sciences, Institute of Tropical Medicine, Antwerp, Belgium; 3. BCCM/ITM Mycobacterial Culture Collection, Institute of Tropical Medicine, Antwerp, Belgium; 4. Department of Biomedical Sciences, Antwerp University, Antwerp, Belgium; 5. Department of Microbiology, School of Medicine,…
Corresponding author email address	conor.meehan@ntu.ac.uk

## Sheet: Online Resource 1
Online Resource 1. Genome accession and taxonomy information. The NCBI accession is listed for each type strain included in the phylogenomic analysis alongside its species name (according to NCBI taxonomy database) and its taxonomic classification in both the NCBI database and GTDB. Also listed is if this strain is classed as a GTDB species representative and as an NCBI type strain.
Accession	NCBI_organism_name	NCBI_taxonomy	GTDB_taxonomy	GTDB_species_representative	NCBI_type_material
GCA_000504975.1	Mycobacterium avium subsp. silvaticum ATCC 49884	d__Bacteria; p__Actinobacteria; c__Actinomycetia; o__Corynebacteriales; f__Mycobacteriaceae; g__Mycobacterium; s__Mycobacterium avium	d__Bacteria; p__Actinomycetota; c__Actinomycetia; o__Mycobacteriales; f__Mycobacteriaceae; g__Mycobacterium; s__Mycobacterium avium	FALSE	TRUE
GCA_001052995.1	Mycolicibacterium conceptionense	d__Bacteria; p__Actinobacteria; c__Actinomycetia; o__Corynebacteriales; f__Mycobacteriaceae; g__Mycolicibacterium; s__Mycolicibacterium conceptionense	d__Bacteria; p__Actinomycetota; c__Actinomycetia; o__Mycobacteriales; f__Mycobacteriaceae; g__Mycobacterium; s__Mycobacterium senegalense	FALSE	TRUE
GCA_001313805.1	Mycobacterium hodleri JCM 12141	d__Bacteria; p__Actinobacteria; c__Actinomycetia; o__Corynebacteriales; f__Mycobacteriaceae; g__Mycobacterium; s__Mycobacterium hodleri	Undefined (Failed Quality Check)	FALSE	TRUE
GCA_001314105.1	Mycobacterium pyrenivorans JCM 15927	d__Bacteria; p__Actinobacteria; c__Actinomycetia; o__Corynebacteriales; f__Mycobacteriaceae; g__Mycobacterium; s__Mycobacterium pyrenivorans	Undefined (Failed Quality Check)	FALSE	TRUE
GCA_001475495.2	Mycolicibacterium fortuitum subsp. fortuitum DSM 46621 = ATCC 6841 = JCM 6387	d__Bacteria; p__Actinobacteria; c__Actinomycetia; o__Corynebacteriales; f__Mycobacteriaceae; g__Mycolicibacterium; s__Mycolicibacterium fortuitum	d__Bacteria; p__Actinomycetota; c__Actinomycetia; o__Mycobacteriales; f__Mycobacteriaceae; g__Mycobacterium; s__Mycobacterium fortuitum	FALSE	TRUE
GCA_002967005.1	Mycobacterium talmoniae	d__Bacteria; p__Actinobacteria; c__Actinomycetia; o__Corynebacteriales; f__Mycobacteriaceae; g__Mycobacterium; s__Mycobacterium talmoniae	d__Bacteria; p__Actinomycetota; c__Actinomycetia; o__Mycobacteriales; f__Mycobacteriaceae; g__Mycobacterium; s__Mycobacterium talmoniae	TRUE	TRUE
GCA_003609695.1	Mycobacterium marinum	d__Bacteria; p__Actinobacteria; c__Actinomycetia; o__Corynebacteriales; f__Mycobacteriaceae; g__Mycobacterium; s__Mycobacterium marinum	d__Bacteria; p__Actinomycetota; c__Actinomycetia; o__Mycobacteriales; f__Mycobacteriaceae; g__Mycobacterium; s__Mycobacterium marinum	FALSE	TRUE
GCF_000015305.1	Mycolicibacterium vanbaalenii PYR-1	d__Bacteria; p__Actinobacteria; c__Actinomycetia; o__Corynebacteriales; f__Mycobacteriaceae; g__Mycolicibacterium; s__Mycolicibacterium vanbaalenii	d__Bacteria; p__Actinomycetota; c__Actinomycetia; o__Mycobacteriales; f__Mycobacteriaceae; g__Mycobacterium; s__Mycobacterium austroafricanum	FALSE	TRUE
GCF_000069185.1	Mycobacteroides abscessus ATCC 19977	d__Bacteria; p__Actinobacteria; c__Actinomycetia; o__Corynebacteriales; f__Mycobacteriaceae; g__Mycobacteroides; s__Mycobacteroides abscessus	d__Bacteria; p__Actinomycetota; c__Actinomycetia; o__Mycobacteriales; f__Mycobacteriaceae; g__Mycobacterium; s__Mycobacterium abscessus	TRUE	TRUE
GCF_000157895.3	Mycobacterium kansasii ATCC 12478	d__Bacteria; p__Actinobacteria; c__Actinomycetia; o__Corynebacteriales; f__Mycobacteriaceae; g__Mycobacterium; s__Mycobacterium kansasii	d__Bacteria; p__Actinomycetota; c__Actinomycetia; o__Mycobacteriales; f__Mycobacteriaceae; g__Mycobacterium; s__Mycobacterium kansasii	TRUE	TRUE
GCF_000164135.1	Mycobacterium parascrofulaceum ATCC BAA-614	d__Bacteria; p__Actinobacteria; c__Actinomycetia; o__Corynebacteriales; f__Mycobacteriaceae; g__Mycobacterium; s__Mycobacterium parascrofulaceum	d__Bacteria; p__Actinomycetota; c__Actinomycetia; o__Mycobacteriales; f__Mycobacteriaceae; g__Mycobacterium; s__Mycobacterium parascrofulaceum	TRUE	TRUE
GCF_000172115.1	Mycobacterium intracellulare ATCC 13950	d__Bacteria; p__Actinobacteria; c__Actinomycetia; o__Corynebacteriales; f__Mycobacteriaceae; g__Mycobacterium; s__Mycobacterium intracellulare	d__Bacteria; p__Actinomycetota; c__Actinomycetia; o__Mycobacteriales; f__Mycobacteriaceae; g__Mycobacterium; s__Mycobacterium intracellulare	FALSE	TRUE
GCF_000174035.1	Mycobacterium avium subsp. avium ATCC 25291	d__Bacteria; p__Actinobacteria; c__Actinomycetia; o__Corynebacteriales; f__Mycobacteriaceae; g__Mycobacterium; s__Mycobacterium avium	d__Bacteria; p__Actinomycetota; c__Actinomycetia; o__Mycobacteriales; f__Mycobacteriaceae; g__Mycobacterium; s__Mycobacterium avium	FALSE	TRUE
GCF_000195955.2	Mycobacterium tuberculosis H37Rv	d__Bacteria; p__Actinobacteria; c__Actinomycetia; o__Corynebacteriales; f__Mycobacteriaceae; g__Mycobacterium; s__Mycobacterium tuberculosis	d__Bacteria; p__Actinomycetota; c__Actinomycetia; o__Mycobacteriales; f__Mycobacteriaceae; g__Mycobacterium; s__Mycobacterium tuberculosis	TRUE	TRUE
GCF_000214155.1	Mycolicibacter sinensis	d__Bacteria; p__Actinobacteria; c__Actinomycetia; o__Corynebacteriales; f__Mycobacteriaceae; g__Mycolicibacter; s__Mycolicibacter sinensis	d__Bacteria; p__Actinomycetota; c__Actinomycetia; o__Mycobacteriales; f__Mycobacteriaceae; g__Mycobacterium; s__Mycobacterium algericum	FALSE	TRUE
GCF_000222105.3	Mycobacterium colombiense CECT 3035	d__Bacteria; p__Actinobacteria; c__Actinomycetia; o__Corynebacteriales; f__Mycobacteriaceae; g__Mycobacterium; s__Mycobacterium colombiense	d__Bacteria; p__Actinomycetota; c__Actinomycetia; o__Mycobacteriales; f__Mycobacteriaceae; g__Mycobacterium; s__Mycobacterium colombiense	FALSE	TRUE
GCF_000234585.1	Mycolicibacterium thermoresistibile ATCC 19527	d__Bacteria; p__Actinobacteria; c__Actinomycetia; o__Corynebacteriales; f__Mycobacteriaceae; g__Mycolicibacterium; s__Mycolicibacterium thermoresistibile	d__Bacteria; p__Actinomycetota; c__Actinomycetia; o__Mycobacteriales; f__Mycobacteriaceae; g__Mycobacterium; s__Mycobacterium thermoresistibile	FALSE	TRUE
GCF_000239035.1	Mycobacteroides abscessus subsp. bolletii BD	d__Bacteria; p__Actinobacteria; c__Actinomycetia; o__Corynebacteriales; f__Mycobacteriaceae; g__Mycobacteroides; s__Mycobacteroides abscessus	d__Bacteria; p__Actinomycetota; c__Actinomycetia; o__Mycobacteriales; f__Mycobacteriaceae; g__Mycobacterium; s__Mycobacterium abscessus	FALSE	TRUE
GCF_000239055.1	Mycobacteroides abscessus subsp. massiliense CCUG 48898 = JCM 15300	d__Bacteria; p__Actinobacteria; c__Actinomycetia; o__Corynebacteriales; f__Mycobacteriaceae; g__Mycobacteroides; s__Mycobacteroides abscessus	d__Bacteria; p__Actinomycetota; c__Actinomycetia; o__Mycobacteriales; f__Mycobacteriaceae; g__Mycobacterium; s__Mycobacterium abscessus	FALSE	TRUE
GCF_000270665.1	Mycobacteroides abscessus subsp. massiliense CCUG 48898 = JCM 15300	d__Bacteria; p__Actinobacteria; c__Actinomycetia; o__Corynebacteriales; f__Mycobacteriaceae; g__Mycobacteroides; s__Mycobacteroides abscessus	d__Bacteria; p__Actinomycetota; c__Actinomycetia; o__Mycobacteriales; f__Mycobacteriaceae; g__Mycobacterium; s__Mycobacterium abscessus	FALSE	TRUE
GCF_000276825.1	Mycobacterium paraintracellulare	d__Bacteria; p__Actinobacteria; c__Actinomycetia; o__Corynebacteriales; f__Mycobacteriaceae; g__Mycobacterium; s__Mycobacterium paraintracellulare	d__Bacteria; p__Actinomycetota; c__Actinomycetia; o__Mycobacteriales; f__Mycobacteriaceae; g__Mycobacterium; s__Mycobacterium intracellulare	FALSE	TRUE
GCF_000277125.1	Mycobacterium intracellulare ATCC 13950	d__Bacteria; p__Actinobacteria; c__Actinomycetia; o__Corynebacteriales; f__Mycobacteriaceae; g__Mycobacterium; s__Mycobacterium intracellulare	d__Bacteria; p__Actinomycetota; c__Actinomycetia; o__Mycobacteriales; f__Mycobacteriaceae; g__Mycobacterium; s__Mycobacterium intracellulare	TRUE	TRUE
GCF_000277735.2	Mycobacterium tuberculosis H37Rv	d__Bacteria; p__Actinobacteria; c__Actinomycetia; o__Corynebacteriales; f__Mycobacteriaceae; g__Mycobacterium; s__Mycobacterium tuberculosis	d__Bacteria; p__Actinomycetota; c__Actinomycetia; o__Mycobacteriales; f__Mycobacteriaceae; g__Mycobacterium; s__Mycobacterium tuberculosis	FALSE	TRUE
GCF_000295855.1	Mycolicibacterium fortuitum subsp. fortuitum DSM 46621 = ATCC 6841 = JCM 6387	d__Bacteria; p__Actinobacteria; c__Actinomycetia; o__Corynebacteriales; f__Mycobacteriaceae; g__Mycolicibacterium; s__Mycolicibacterium fortuitum	d__Bacteria; p__Actinomycetota; c__Actinomycetia; o__Mycobacteriales; f__Mycobacteriaceae; g__Mycobacterium; s__Mycobacterium fortuitum	FALSE	TRUE
GCF_000300375.1	Mycolicibacterium hassiacum DSM 44199	d__Bacteria; p__Actinobacteria; c__Actinomycetia; o__Corynebacteriales; f__Mycobacteriaceae; g__Mycolicibacterium; s__Mycolicibacterium hassiacum	d__Bacteria; p__Actinomycetota; c__Actinomycetia; o__Mycobacteriales; f__Mycobacteriaceae; g__Mycobacterium; s__Mycobacterium hassiacum	FALSE	TRUE
GCF_000340435.2	Mycobacterium haemophilum DSM 44634	d__Bacteria; p__Actinobacteria; c__Actinomycetia; o__Corynebacteriales; f__Mycobacteriaceae; g__Mycobacterium; s__Mycobacterium haemophilum	d__Bacteria; p__Actinomycetota; c__Actinomycetia; o__Mycobacteriales; f__Mycobacteriaceae; g__Mycobacterium; s__Mycobacterium haemophilum	TRUE	TRUE
GCF_000379865.1	Mycolicibacterium hassiacum DSM 44199	d__Bacteria; p__Actinobacteria; c__Actinomycetia; o__Corynebacteriales; f__Mycobacteriaceae; g__Mycolicibacterium; s__Mycolicibacterium hassiacum	d__Bacteria; p__Actinomycetota; c__Actinomycetia; o__Mycobacteriales; f__Mycobacteriaceae; g__Mycobacterium; s__Mycobacterium hassiacum	FALSE	TRUE
GCF_000418535.1	Mycobacterium intracellulare subsp. yongonense 05-1390	d__Bacteria; p__Actinobacteria; c__Actinomycetia; o__Corynebacteriales; f__Mycobacteriaceae; g__Mycobacterium; s__Mycobacterium intracellulare	d__Bacteria; p__Actinomycetota; c__Actinomycetia; o__Mycobacteriales; f__Mycobacteriaceae; g__Mycobacterium; s__Mycobacterium intracellulare	FALSE	TRUE
GCF_000455325.1	Mycolicibacterium septicum DSM 44393	d__Bacteria; p__Actinobacteria; c__Actinomycetia; o__Corynebacteriales; f__Mycobacteriaceae; g__Mycolicibacterium; s__Mycolicibacterium septicum	d__Bacteria; p__Actinomycetota; c__Actinomycetia; o__Mycobacteriales; f__Mycobacteriaceae; g__Mycobacterium; s__Mycobacterium septicum	TRUE	TRUE
GCF_000497265.2	Mycobacteroides abscessus subsp. massiliense CCUG 48898 = JCM 15300	d__Bacteria; p__Actinobacteria; c__Actinomycetia; o__Corynebacteriales; f__Mycobacteriaceae; g__Mycobacteroides; s__Mycobacteroides abscessus	d__Bacteria; p__Actinomycetota; c__Actinomycetia; o__Mycobacteriales; f__Mycobacteriaceae; g__Mycobacterium; s__Mycobacterium abscessus	FALSE	TRUE
GCF_000526915.1	Mycobacterium genavense ATCC 51234	d__Bacteria; p__Actinobacteria; c__Actinomycetia; o__Corynebacteriales; f__Mycobacteriaceae; g__Mycobacterium; s__Mycobacterium genavense	d__Bacteria; p__Actinomycetota; c__Actinomycetia; o__Mycobacteriales; f__Mycobacteriaceae; g__Mycobacterium; s__Mycobacterium genavense	TRUE	TRUE
GCF_000559085.1	Mycolicibacterium aromaticivorans JS19b1 = JCM 16368	d__Bacteria; p__Actinobacteria; c__Actinomycetia; o__Corynebacteriales; f__Mycobacteriaceae; g__Mycolicibacterium; s__Mycolicibacterium aromaticivorans	d__Bacteria; p__Actinomycetota; c__Actinomycetia; o__Mycobacteriales; f__Mycobacteriaceae; g__Mycobacterium; s__Mycobacterium aromaticivorans	TRUE	TRUE
GCF_000612725.1	Mycolicibacterium austroafricanum	d__Bacteria; p__Actinobacteria; c__Actinomycetia; o__Corynebacteriales; f__Mycobacteriaceae; g__Mycolicibacterium; s__Mycolicibacterium austroafricanum	d__Bacteria; p__Actinomycetota; c__Actinomycetia; o__Mycobacteriales; f__Mycobacteriaceae; g__Mycobacterium; s__Mycobacterium austroafricanum	TRUE	TRUE
GCF_000612825.1	Mycolicibacterium mageritense DSM 44476 = CIP 104973	d__Bacteria; p__Actinobacteria; c__Actinomycetia; o__Corynebacteriales; f__Mycobacteriaceae; g__Mycolicibacterium; s__Mycolicibacterium mageritense	d__Bacteria; p__Actinomycetota; c__Actinomycetia; o__Mycobacteriales; f__Mycobacteriaceae; g__Mycobacterium; s__Mycobacterium mageritense	FALSE	TRUE
GCF_000613185.1	Mycolicibacterium cosmeticum	d__Bacteria; p__Actinobacteria; c__Actinomycetia; o__Corynebacteriales; f__Mycobacteriaceae; g__Mycolicibacterium; s__Mycolicibacterium cosmeticum	d__Bacteria; p__Actinomycetota; c__Actinomycetia; o__Mycobacteriales; f__Mycobacteriaceae; g__Mycobacterium; s__Mycobacterium cosmeticum	TRUE	TRUE
GCF_000613245.1	Mycobacterium asiaticum DSM 44297	d__Bacteria; p__Actinobacteria; c__Actinomycetia; o__Corynebacteriales; f__Mycobacteriaceae; g__Mycobacterium; s__Mycobacterium asiaticum	d__Bacteria; p__Actinomycetota; c__Actinomycetia; o__Mycobacteriales; f__Mycobacteriaceae; g__Mycobacterium; s__Mycobacterium asiaticum	TRUE	TRUE
GCF_000667805.1	Mycobacterium tuberculosis H37Rv	d__Bacteria; p__Actinobacteria; c__Actinomycetia; o__Corynebacteriales; f__Mycobacteriaceae; g__Mycobacterium; s__Mycobacterium tuberculosis	d__Bacteria; p__Actinomycetota; c__Actinomycetia; o__Mycobacteriales; f__Mycobacteriaceae; g__Mycobacterium; s__Mycobacterium tuberculosis	FALSE	TRUE
GCF_000689255.1	Mycobacterium triplex	d__Bacteria; p__Actinobacteria; c__Actinomycetia; o__Corynebacteriales; f__Mycobacteriaceae; g__Mycobacterium; s__Mycobacterium triplex	d__Bacteria; p__Actinomycetota; c__Actinomycetia; o__Mycobacteriales; f__Mycobacteriaceae; g__Mycobacterium; s__Mycobacterium triplex	TRUE	TRUE
GCF_000691525.1	Mycolicibacterium neoaurum ATCC 25795	d__Bacteria; p__Actinobacteria; c__Actinomycetia; o__Corynebacteriales; f__Mycobacteriaceae; g__Mycolicibacterium; s__Mycolicibacterium neoaurum	d__Bacteria; p__Actinomycetota; c__Actinomycetia; o__Mycobacteriales; f__Mycobacteriaceae; g__Mycobacterium; s__Mycobacterium neoaurum	TRUE	TRUE
GCF_000723385.1	Mycolicibacterium farcinogenes	d__Bacteria; p__Actinobacteria; c__Actinomycetia; o__Corynebacteriales; f__Mycobacteriaceae; g__Mycolicibacterium; s__Mycolicibacterium farcinogenes	d__Bacteria; p__Actinomycetota; c__Actinomycetia; o__Mycobacteriales; f__Mycobacteriaceae; g__Mycobacterium; s__Mycobacterium senegalense	FALSE	TRUE
GCF_000724065.1	Mycolicibacterium neoaurum	d__Bacteria; p__Actinobacteria; c__Actinomycetia; o__Corynebacteriales; f__Mycobacteriaceae; g__Mycolicibacterium; s__Mycolicibacterium neoaurum	d__Bacteria; p__Actinomycetota; c__Actinomycetia; o__Mycobacteriales; f__Mycobacteriaceae; g__Mycobacterium; s__Mycobacterium neoaurum	FALSE	TRUE
GCF_000759695.1	Mycobacterium kyorinense	d__Bacteria; p__Actinobacteria; c__Actinomycetia; o__Corynebacteriales; f__Mycobacteriaceae; g__Mycobacterium; s__Mycobacterium kyorinense	d__Bacteria; p__Actinomycetota; c__Actinomycetia; o__Mycobacteriales; f__Mycobacteriaceae; g__Mycobacterium; s__Mycobacterium kyorinense	FALSE	TRUE
GCF_000805385.1	Mycolicibacterium setense	d__Bacteria; p__Actinobacteria; c__Actinomycetia; o__Corynebacteriales; f__Mycobacteriaceae; g__Mycolicibacterium; s__Mycolicibacterium setense	d__Bacteria; p__Actinomycetota; c__Actinomycetia; o__Mycobacteriales; f__Mycobacteriaceae; g__Mycobacterium; s__Mycobacterium setense	TRUE	TRUE
GCF_000971805.1	Mycobacteroides chelonae	d__Bacteria; p__Actinobacteria; c__Actinomycetia; o__Corynebacteriales; f__Mycobacteriaceae; g__Mycobacteroides; s__Mycobacteroides chelonae	d__Bacteria; p__Actinomycetota; c__Actinomycetia; o__Mycobacteriales; f__Mycobacteriaceae; g__Mycobacterium; s__Mycobacterium chelonae	FALSE	TRUE
GCF_000974705.1	Mycobacterium celatum	d__Bacteria; p__Actinobacteria; c__Actinomycetia; o__Corynebacteriales; f__Mycobacteriaceae; g__Mycobacterium; s__Mycobacterium celatum	d__Bacteria; p__Actinomycetota; c__Actinomycetia; o__Mycobacteriales; f__Mycobacteriaceae; g__Mycobacterium; s__Mycobacterium celatum	FALSE	TRUE
GCF_000975265.2	Mycobacterium lepromatosis	d__Bacteria; p__Actinobacteria; c__Actinomycetia; o__Corynebacteriales; f__Mycobacteriaceae; g__Mycobacterium; s__Mycobacterium lepromatosis	d__Bacteria; p__Actinomycetota; c__Actinomycetia; o__Mycobacteriales; f__Mycobacteriaceae; g__Mycobacterium; s__Mycobacterium lepromatosis	TRUE	TRUE
GCF_001044235.1	Mycolicibacterium chlorophenolicum	d__Bacteria; p__Actinobacteria; c__Actinomycetia; o__Corynebacteriales; f__Mycobacteriaceae; g__Mycolicibacterium; s__Mycolicibacterium chlorophenolicum	d__Bacteria; p__Actinomycetota; c__Actinomycetia; o__Mycobacteriales; f__Mycobacteriaceae; g__Mycobacterium; s__Mycobacterium chlorophenolicum	TRUE	TRUE
GCF_001044245.1	Mycolicibacterium obuense	d__Bacteria; p__Actinobacteria; c__Actinomycetia; o__Corynebacteriales; f__Mycobacteriaceae; g__Mycolicibacterium; s__Mycolicibacterium obuense	d__Bacteria; p__Actinomycetota; c__Actinomycetia; o__Mycobacteriales; f__Mycobacteriaceae; g__Mycobacterium; s__Mycobacterium kyogaense	FALSE	TRUE
GCF_001044255.1	Mycolicibacterium chubuense	d__Bacteria; p__Actinobacteria; c__Actinomycetia; o__Corynebacteriales; f__Mycobacteriaceae; g__Mycolicibacterium; s__Mycolicibacterium chubuense	d__Bacteria; p__Actinomycetota; c__Actinomycetia; o__Mycobacteriales; f__Mycobacteriaceae; g__Mycobacterium; s__Mycobacterium chubuense	TRUE	TRUE
GCF_001049355.1	Mycolicibacterium aurum	d__Bacteria; p__Actinobacteria; c__Actinomycetia; o__Corynebacteriales; f__Mycobacteriaceae; g__Mycolicibacterium; s__Mycolicibacterium aurum	d__Bacteria; p__Actinomycetota; c__Actinomycetia; o__Mycobacteriales; f__Mycobacteriaceae; g__Mycobacterium; s__Mycobacterium aurum	FALSE	TRUE
GCF_001050015.1	Mycolicibacterium malmesburyense	d__Bacteria; p__Actinobacteria; c__Actinomycetia; o__Corynebacteriales; f__Mycobacteriaceae; g__Mycolicibacterium; s__Mycolicibacterium malmesburyense	d__Bacteria; p__Actinomycetota; c__Actinomycetia; o__Mycobacteriales; f__Mycobacteriaceae; g__Mycobacterium; s__Mycobacterium malmesburyense	TRUE	TRUE
GCF_001050035.1	Mycolicibacterium komanii	d__Bacteria; p__Actinobacteria; c__Actinomycetia; o__Corynebacteriales; f__Mycobacteriaceae; g__Mycolicibacterium; s__Mycolicibacterium komanii	d__Bacteria; p__Actinomycetota; c__Actinomycetia; o__Mycobacteriales; f__Mycobacteriaceae; g__Mycobacterium; s__Mycobacterium komanii	TRUE	TRUE
GCF_001053185.1	Mycobacterium bohemicum DSM 44277	d__Bacteria; p__Actinobacteria; c__Actinomycetia; o__Corynebacteriales; f__Mycobacteriaceae; g__Mycobacterium; s__Mycobacterium bohemicum	d__Bacteria; p__Actinomycetota; c__Actinomycetia; o__Mycobacteriales; f__Mycobacteriaceae; g__Mycobacterium; s__Mycobacterium bohemicum	TRUE	TRUE
GCF_001245615.1	Mycolicibacterium neworleansense	d__Bacteria; p__Actinobacteria; c__Actinomycetia; o__Corynebacteriales; f__Mycobacteriaceae; g__Mycolicibacterium; s__Mycolicibacterium neworleansense	d__Bacteria; p__Actinomycetota; c__Actinomycetia; o__Mycobacteriales; f__Mycobacteriaceae; g__Mycobacterium; s__Mycobacterium neworleansense	TRUE	TRUE
GCF_001456355.1	Mycobacteroides saopaulense	d__Bacteria; p__Actinobacteria; c__Actinomycetia; o__Corynebacteriales; f__Mycobacteriaceae; g__Mycobacteroides; s__Mycobacteroides saopaulense	d__Bacteria; p__Actinomycetota; c__Actinomycetia; o__Mycobacteriales; f__Mycobacteriaceae; g__Mycobacterium; s__Mycobacterium saopaulense	TRUE	TRUE
GCF_001457595.1	Mycolicibacterium smegmatis	d__Bacteria; p__Actinobacteria; c__Actinomycetia; o__Corynebacteriales; f__Mycobacteriaceae; g__Mycolicibacterium; s__Mycolicibacterium smegmatis	d__Bacteria; p__Actinomycetota; c__Actinomycetia; o__Mycobacteriales; f__Mycobacteriaceae; g__Mycobacterium; s__Mycobacterium smegmatis	TRUE	TRUE
GCF_001515365.1	Mycobacterium pseudoshottsii JCM 15466	d__Bacteria; p__Actinobacteria; c__Actinomycetia; o__Corynebacteriales; f__Mycobacteriaceae; g__Mycobacterium; s__Mycobacterium pseudoshottsii	d__Bacteria; p__Actinomycetota; c__Actinomycetia; o__Mycobacteriales; f__Mycobacteriaceae; g__Mycobacterium; s__Mycobacterium marinum	FALSE	TRUE
GCF_001552315.1	Mycolicibacterium chlorophenolicum JCM 7439 = NBRC 15527	d__Bacteria; p__Actinobacteria; c__Actinomycetia; o__Corynebacteriales; f__Mycobacteriaceae; g__Mycolicibacterium; s__Mycolicibacterium chlorophenolicum	d__Bacteria; p__Actinomycetota; c__Actinomycetia; o__Mycobacteriales; f__Mycobacteriaceae; g__Mycobacterium; s__Mycobacterium chlorophenolicum	FALSE	TRUE
GCF_001552715.1	Mycolicibacterium vaccae NBRC 14118 = CIP 105934	d__Bacteria; p__Actinobacteria; c__Actinomycetia; o__Corynebacteriales; f__Mycobacteriaceae; g__Mycolicibacterium; s__Mycolicibacterium vaccae	d__Bacteria; p__Actinomycetota; c__Actinomycetia; o__Mycobacteriales; f__Mycobacteriaceae; g__Mycobacterium; s__Mycobacterium vaccae	TRUE	TRUE
GCF_001570425.1	Mycolicibacterium brisbanense	d__Bacteria; p__Actinobacteria; c__Actinomycetia; o__Corynebacteriales; f__Mycobacteriaceae; g__Mycolicibacterium; s__Mycolicibacterium brisbanense	d__Bacteria; p__Actinomycetota; c__Actinomycetia; o__Mycobacteriales; f__Mycobacteriaceae; g__Mycobacterium; s__Mycobacterium brisbanense	TRUE	TRUE
GCF_001570445.1	Mycolicibacterium canariasense	d__Bacteria; p__Actinobacteria; c__Actinomycetia; o__Corynebacteriales; f__Mycobacteriaceae; g__Mycolicibacterium; s__Mycolicibacterium canariasense	d__Bacteria; p__Actinomycetota; c__Actinomycetia; o__Mycobacteriales; f__Mycobacteriaceae; g__Mycobacterium; s__Mycobacterium canariasense	FALSE	TRUE
GCF_001570465.1	Mycolicibacterium fortuitum subsp. acetamidolyticum	d__Bacteria; p__Actinobacteria; c__Actinomycetia; o__Corynebacteriales; f__Mycobacteriaceae; g__Mycolicibacterium; s__Mycolicibacterium fortuitum	d__Bacteria; p__Actinomycetota; c__Actinomycetia; o__Mycobacteriales; f__Mycobacteriaceae; g__Mycobacterium; s__Mycobacterium fortuitum	FALSE	TRUE
GCF_001570485.1	Mycolicibacterium novocastrense	d__Bacteria; p__Actinobacteria; c__Actinomycetia; o__Corynebacteriales; f__Mycobacteriaceae; g__Mycolicibacterium; s__Mycolicibacterium novocastrense	d__Bacteria; p__Actinomycetota; c__Actinomycetia; o__Mycobacteriales; f__Mycobacteriaceae; g__Mycobacterium; s__Mycobacterium novocastrense	TRUE	TRUE
GCF_001570505.1	Mycolicibacterium thermoresistibile	d__Bacteria; p__Actinobacteria; c__Actinomycetia; o__Corynebacteriales; f__Mycobacteriaceae; g__Mycolicibacterium; s__Mycolicibacterium thermoresistibile	d__Bacteria; p__Actinomycetota; c__Actinomycetia; o__Mycobacteriales; f__Mycobacteriaceae; g__Mycobacterium; s__Mycobacterium thermoresistibile	FALSE	TRUE
GCF_001582015.1	Mycolicibacterium phlei DSM 43239 = CCUG 21000	d__Bacteria; p__Actinobacteria; c__Actinomycetia; o__Corynebacteriales; f__Mycobacteriaceae; g__Mycolicibacterium; s__Mycolicibacterium phlei	d__Bacteria; p__Actinomycetota; c__Actinomycetia; o__Mycobacteriales; f__Mycobacteriaceae; g__Mycobacterium; s__Mycobacterium phlei	FALSE	TRUE
GCF_001583415.1	Mycolicibacterium phlei	d__Bacteria; p__Actinobacteria; c__Actinomycetia; o__Corynebacteriales; f__Mycobacteriaceae; g__Mycolicibacterium; s__Mycolicibacterium phlei	d__Bacteria; p__Actinomycetota; c__Actinomycetia; o__Mycobacteriales; f__Mycobacteriaceae; g__Mycobacterium; s__Mycobacterium phlei	TRUE	TRUE
GCF_001605725.1	Mycobacteroides immunogenum	d__Bacteria; p__Actinobacteria; c__Actinomycetia; o__Corynebacteriales; f__Mycobacteriaceae; g__Mycobacteroides; s__Mycobacteroides immunogenum	d__Bacteria; p__Actinomycetota; c__Actinomycetia; o__Mycobacteriales; f__Mycobacteriaceae; g__Mycobacterium; s__Mycobacterium immunogenum	TRUE	TRUE
GCF_001632805.1	Mycobacteroides chelonae CCUG 47445	d__Bacteria; p__Actinobacteria; c__Actinomycetia; o__Corynebacteriales; f__Mycobacteriaceae; g__Mycobacteroides; s__Mycobacteroides chelonae	d__Bacteria; p__Actinomycetota; c__Actinomycetia; o__Mycobacteriales; f__Mycobacteriaceae; g__Mycobacterium; s__Mycobacterium chelonae	TRUE	TRUE
GCF_001655245.1	Mycolicibacterium vaccae 95051	d__Bacteria; p__Actinobacteria; c__Actinomycetia; o__Corynebacteriales; f__Mycobacteriaceae; g__Mycolicibacterium; s__Mycolicibacterium vaccae	d__Bacteria; p__Actinomycetota; c__Actinomycetia; o__Mycobacteriales; f__Mycobacteriaceae; g__Mycobacterium; s__Mycobacterium vaccae	FALSE	TRUE
GCF_001792615.1	Mycobacteroides abscessus subsp. bolletii	d__Bacteria; p__Actinobacteria; c__Actinomycetia; o__Corynebacteriales; f__Mycobacteriaceae; g__Mycobacteroides; s__Mycobacteroides abscessus	d__Bacteria; p__Actinomycetota; c__Actinomycetia; o__Mycobacteriales; f__Mycobacteriaceae; g__Mycobacterium; s__Mycobacterium abscessus	FALSE	TRUE
GCF_001792625.1	Mycobacteroides abscessus subsp. massiliense	d__Bacteria; p__Actinobacteria; c__Actinomycetia; o__Corynebacteriales; f__Mycobacteriaceae; g__Mycobacteroides; s__Mycobacteroides abscessus	d__Bacteria; p__Actinomycetota; c__Actinomycetia; o__Mycobacteriales; f__Mycobacteriaceae; g__Mycobacterium; s__Mycobacterium abscessus	FALSE	TRUE
GCF_001938095.1	Mycobacterium intracellulare subsp. chimaera	d__Bacteria; p__Actinobacteria; c__Actinomycetia; o__Corynebacteriales; f__Mycobacteriaceae; g__Mycobacterium; s__Mycobacterium intracellulare	d__Bacteria; p__Actinomycetota; c__Actinomycetia; o__Mycobacteriales; f__Mycobacteriaceae; g__Mycobacterium; s__Mycobacterium intracellulare	FALSE	TRUE
GCF_001942505.1	Mycobacteroides abscessus ATCC 19977	d__Bacteria; p__Actinobacteria; c__Actinomycetia; o__Corynebacteriales; f__Mycobacteriaceae; g__Mycobacteroides; s__Mycobacteroides abscessus	d__Bacteria; p__Actinomycetota; c__Actinomycetia; o__Mycobacteriales; f__Mycobacteriaceae; g__Mycobacterium; s__Mycobacterium abscessus	FALSE	TRUE
GCF_001942545.1	Mycobacteroides chelonae	d__Bacteria; p__Actinobacteria; c__Actinomycetia; o__Corynebacteriales; f__Mycobacteriaceae; g__Mycobacteroides; s__Mycobacteroides chelonae	d__Bacteria; p__Actinomycetota; c__Actinomycetia; o__Mycobacteriales; f__Mycobacteriaceae; g__Mycobacterium; s__Mycobacterium chelonae	FALSE	TRUE
GCF_001942625.1	Mycobacterium syngnathidarum	d__Bacteria; p__Actinobacteria; c__Actinomycetia; o__Corynebacteriales; f__Mycobacteriaceae; g__Mycobacterium; s__Mycobacterium syngnathidarum	d__Bacteria; p__Actinomycetota; c__Actinomycetia; o__Mycobacteriales; f__Mycobacteriaceae; g__Mycobacterium; s__Mycobacterium syngnathidarum	TRUE	TRUE
GCF_002013555.1	Mycobacteroides immunogenum	d__Bacteria; p__Actinobacteria; c__Actinomycetia; o__Corynebacteriales; f__Mycobacteriaceae; g__Mycobacteroides; s__Mycobacteroides immunogenum	d__Bacteria; p__Actinomycetota; c__Actinomycetia; o__Mycobacteriales; f__Mycobacteriaceae; g__Mycobacterium; s__Mycobacterium immunogenum	FALSE	TRUE
GCF_002013685.1	Mycobacteroides salmoniphilum	d__Bacteria; p__Actinobacteria; c__Actinomycetia; o__Corynebacteriales; f__Mycobacteriaceae; g__Mycobacteroides; s__Mycobacteroides salmoniphilum	d__Bacteria; p__Actinomycetota; c__Actinomycetia; o__Mycobacteriales; f__Mycobacteriaceae; g__Mycobacterium; s__Mycobacterium salmoniphilum	FALSE	TRUE
GCF_002013835.1	Mycobacteroides abscessus subsp. bolletii	d__Bacteria; p__Actinobacteria; c__Actinomycetia; o__Corynebacteriales; f__Mycobacteriaceae; g__Mycobacteroides; s__Mycobacteroides abscessus	d__Bacteria; p__Actinomycetota; c__Actinomycetia; o__Mycobacteriales; f__Mycobacteriaceae; g__Mycobacterium; s__Mycobacterium abscessus	FALSE	TRUE
GCF_002013895.1	Mycobacteroides franklinii	d__Bacteria; p__Actinobacteria; c__Actinomycetia; o__Corynebacteriales; f__Mycobacteriaceae; g__Mycobacteroides; s__Mycobacteroides franklinii	d__Bacteria; p__Actinomycetota; c__Actinomycetia; o__Mycobacteriales; f__Mycobacteriaceae; g__Mycobacterium; s__Mycobacterium franklinii	TRUE	TRUE
GCF_002086115.1	Mycolicibacterium bacteremicum	d__Bacteria; p__Actinobacteria; c__Actinomycetia; o__Corynebacteriales; f__Mycobacteriaceae; g__Mycolicibacterium; s__Mycolicibacterium bacteremicum	d__Bacteria; p__Actinomycetota; c__Actinomycetia; o__Mycobacteriales; f__Mycobacteriaceae; g__Mycobacterium; s__Mycobacterium bacteremicum	TRUE	TRUE
GCF_002086125.1	Mycobacterium arosiense ATCC BAA-1401 = DSM 45069	d__Bacteria; p__Actinobacteria; c__Actinomycetia; o__Corynebacteriales; f__Mycobacteriaceae; g__Mycobacterium; s__Mycobacterium arosiense	d__Bacteria; p__Actinomycetota; c__Actinomycetia; o__Mycobacteriales; f__Mycobacteriaceae; g__Mycobacterium; s__Mycobacterium arosiense	TRUE	TRUE
GCF_002086155.1	Mycobacterium angelicum	d__Bacteria; p__Actinobacteria; c__Actinomycetia; o__Corynebacteriales; f__Mycobacteriaceae; g__Mycobacterium; s__Mycobacterium angelicum	d__Bacteria; p__Actinomycetota; c__Actinomycetia; o__Mycobacteriales; f__Mycobacteriaceae; g__Mycobacterium; s__Mycobacterium angelicum	TRUE	TRUE
GCF_002086165.1	Mycobacterium bouchedurhonense	d__Bacteria; p__Actinobacteria; c__Actinomycetia; o__Corynebacteriales; f__Mycobacteriaceae; g__Mycobacterium; s__Mycobacterium bouchedurhonense	d__Bacteria; p__Actinomycetota; c__Actinomycetia; o__Mycobacteriales; f__Mycobacteriaceae; g__Mycobacterium; s__Mycobacterium avium	FALSE	TRUE
GCF_002086175.1	Mycolicibacterium celeriflavum	d__Bacteria; p__Actinobacteria; c__Actinomycetia; o__Corynebacteriales; f__Mycobacteriaceae; g__Mycolicibacterium; s__Mycolicibacterium celeriflavum	d__Bacteria; p__Actinomycetota; c__Actinomycetia; o__Mycobacteriales; f__Mycobacteriaceae; g__Mycobacterium; s__Mycobacterium celeriflavum	FALSE	TRUE
GCF_002086215.1	Mycobacterium heidelbergense	d__Bacteria; p__Actinobacteria; c__Actinomycetia; o__Corynebacteriales; f__Mycobacteriaceae; g__Mycobacterium; s__Mycobacterium heidelbergense	d__Bacteria; p__Actinomycetota; c__Actinomycetia; o__Mycobacteriales; f__Mycobacteriaceae; g__Mycobacterium; s__Mycobacterium heidelbergense	FALSE	TRUE
GCF_002086225.1	Mycobacteroides franklinii	d__Bacteria; p__Actinobacteria; c__Actinomycetia; o__Corynebacteriales; f__Mycobacteriaceae; g__Mycobacteroides; s__Mycobacteroides franklinii	d__Bacteria; p__Actinomycetota; c__Actinomycetia; o__Mycobacteriales; f__Mycobacteriaceae; g__Mycobacterium; s__Mycobacterium franklinii	FALSE	TRUE
GCF_002086275.1	Mycobacterium intermedium	d__Bacteria; p__Actinobacteria; c__Actinomycetia; o__Corynebacteriales; f__Mycobacteriaceae; g__Mycobacterium; s__Mycobacterium intermedium	d__Bacteria; p__Actinomycetota; c__Actinomycetia; o__Mycobacteriales; f__Mycobacteriaceae; g__Mycobacterium; s__Mycobacterium intermedium	TRUE	TRUE
GCF_002086285.1	Mycolicibacter kumamotonensis	d__Bacteria; p__Actinobacteria; c__Actinomycetia; o__Corynebacteriales; f__Mycobacteriaceae; g__Mycolicibacter; s__Mycolicibacter kumamotonensis	d__Bacteria; p__Actinomycetota; c__Actinomycetia; o__Mycobacteriales; f__Mycobacteriaceae; g__Mycobacterium; s__Mycobacterium kumamotonense	TRUE	TRUE
GCF_002086335.1	Mycobacterium mantenii	d__Bacteria; p__Actinobacteria; c__Actinomycetia; o__Corynebacteriales; f__Mycobacteriaceae; g__Mycobacterium; s__Mycobacterium mantenii	d__Bacteria; p__Actinomycetota; c__Actinomycetia; o__Mycobacteriales; f__Mycobacteriaceae; g__Mycobacterium; s__Mycobacterium mantenii	FALSE	TRUE
GCF_002086345.1	Mycobacterium marseillense	d__Bacteria; p__Actinobacteria; c__Actinomycetia; o__Corynebacteriales; f__Mycobacteriaceae; g__Mycobacterium; s__Mycobacterium marseillense	d__Bacteria; p__Actinomycetota; c__Actinomycetia; o__Mycobacteriales; f__Mycobacteriaceae; g__Mycobacterium; s__Mycobacterium marseillense	FALSE	TRUE
GCF_002086375.1	Mycobacteroides abscessus subsp. massiliense	d__Bacteria; p__Actinobacteria; c__Actinomycetia; o__Corynebacteriales; f__Mycobacteriaceae; g__Mycobacteroides; s__Mycobacteroides abscessus	d__Bacteria; p__Actinomycetota; c__Actinomycetia; o__Mycobacteriales; f__Mycobacteriaceae; g__Mycobacterium; s__Mycobacterium abscessus	FALSE	TRUE
GCF_002086395.1	Mycolicibacterium moriokaense	d__Bacteria; p__Actinobacteria; c__Actinomycetia; o__Corynebacteriales; f__Mycobacteriaceae; g__Mycolicibacterium; s__Mycolicibacterium moriokaense	d__Bacteria; p__Actinomycetota; c__Actinomycetia; o__Mycobacteriales; f__Mycobacteriaceae; g__Mycobacterium; s__Mycobacterium moriokaense	FALSE	TRUE
GCF_002086405.1	Mycolicibacter minnesotensis	d__Bacteria; p__Actinobacteria; c__Actinomycetia; o__Corynebacteriales; f__Mycobacteriaceae; g__Mycolicibacter; s__Mycolicibacter minnesotensis	d__Bacteria; p__Actinomycetota; c__Actinomycetia; o__Mycobacteriales; f__Mycobacteriaceae; g__Mycobacterium; s__Mycobacterium minnesotense	FALSE	TRUE
GCF_002086415.1	Mycobacterium noviomagense	d__Bacteria; p__Actinobacteria; c__Actinomycetia; o__Corynebacteriales; f__Mycobacteriaceae; g__Mycobacterium; s__Mycobacterium noviomagense	d__Bacteria; p__Actinomycetota; c__Actinomycetia; o__Mycobacteriales; f__Mycobacteriaceae; g__Mycobacterium; s__Mycobacterium noviomagense	FALSE	TRUE
GCF_002086455.1	Mycolicibacter algericus DSM 45454	d__Bacteria; p__Actinobacteria; c__Actinomycetia; o__Corynebacteriales; f__Mycobacteriaceae; g__Mycolicibacter; s__Mycolicibacter algericus	d__Bacteria; p__Actinomycetota; c__Actinomycetia; o__Mycobacteriales; f__Mycobacteriaceae; g__Mycobacterium; s__Mycobacterium algericum	TRUE	TRUE
GCF_002086475.1	Mycobacterium paraseoulense	d__Bacteria; p__Actinobacteria; c__Actinomycetia; o__Corynebacteriales; f__Mycobacteriaceae; g__Mycobacterium; s__Mycobacterium paraseoulense	d__Bacteria; p__Actinomycetota; c__Actinomycetia; o__Mycobacteriales; f__Mycobacteriaceae; g__Mycobacterium; s__Mycobacterium paraseoulense	FALSE	TRUE
GCF_002086485.1	Mycobacterium aquaticum	d__Bacteria; p__Actinobacteria; c__Actinomycetia; o__Corynebacteriales; f__Mycobacteriaceae; g__Mycobacterium; s__Mycobacterium aquaticum	d__Bacteria; p__Actinomycetota; c__Actinomycetia; o__Mycobacteriales; f__Mycobacteriaceae; g__Mycobacterium; s__Mycobacterium aquaticum	TRUE	TRUE
GCF_002086515.1	Mycolicibacter arupensis	d__Bacteria; p__Actinobacteria; c__Actinomycetia; o__Corynebacteriales; f__Mycobacteriaceae; g__Mycolicibacter; s__Mycolicibacter arupensis	d__Bacteria; p__Actinomycetota; c__Actinomycetia; o__Mycobacteriales; f__Mycobacteriaceae; g__Mycobacterium; s__Mycobacterium arupense	TRUE	TRUE
GCF_002086525.1	Mycobacteroides abscessus subsp. bolletii	d__Bacteria; p__Actinobacteria; c__Actinomycetia; o__Corynebacteriales; f__Mycobacteriaceae; g__Mycobacteroides; s__Mycobacteroides abscessus	d__Bacteria; p__Actinomycetota; c__Actinomycetia; o__Mycobacteriales; f__Mycobacteriaceae; g__Mycobacterium; s__Mycobacterium abscessus	FALSE	TRUE
GCF_002086545.1	Mycobacterium asiaticum DSM 44297	d__Bacteria; p__Actinobacteria; c__Actinomycetia; o__Corynebacteriales; f__Mycobacteriaceae; g__Mycobacterium; s__Mycobacterium asiaticum	d__Bacteria; p__Actinomycetota; c__Actinomycetia; o__Mycobacteriales; f__Mycobacteriaceae; g__Mycobacterium; s__Mycobacterium asiaticum	FALSE	TRUE
GCF_002086575.1	Mycobacterium branderi	d__Bacteria; p__Actinobacteria; c__Actinomycetia; o__Corynebacteriales; f__Mycobacteriaceae; g__Mycobacterium; s__Mycobacterium branderi	d__Bacteria; p__Actinomycetota; c__Actinomycetia; o__Mycobacteriales; f__Mycobacteriaceae; g__Mycobacterium; s__Mycobacterium branderi	FALSE	TRUE
GCF_002086595.1	Mycolicibacterium chubuense	d__Bacteria; p__Actinobacteria; c__Actinomycetia; o__Corynebacteriales; f__Mycobacteriaceae; g__Mycolicibacterium; s__Mycolicibacterium chubuense	d__Bacteria; p__Actinomycetota; c__Actinomycetia; o__Mycobacteriales; f__Mycobacteriaceae; g__Mycobacterium; s__Mycobacterium chubuense	FALSE	TRUE
GCF_002086635.1	Mycobacterium alsense	d__Bacteria; p__Actinobacteria; c__Actinomycetia; o__Corynebacteriales; f__Mycobacteriaceae; g__Mycobacterium; s__Mycobacterium alsense	d__Bacteria; p__Actinomycetota; c__Actinomycetia; o__Mycobacteriales; f__Mycobacteriaceae; g__Mycobacterium; s__Mycobacterium alsense	TRUE	TRUE
GCF_002086655.1	Mycolicibacterium monacense DSM 44395	d__Bacteria; p__Actinobacteria; c__Actinomycetia; o__Corynebacteriales; f__Mycobacteriaceae; g__Mycolicibacterium; s__Mycolicibacterium monacense	d__Bacteria; p__Actinomycetota; c__Actinomycetia; o__Mycobacteriales; f__Mycobacteriaceae; g__Mycobacterium; s__Mycobacterium monacense	FALSE	TRUE
GCF_002086675.1	Mycobacterium persicum	d__Bacteria; p__Actinobacteria; c__Actinomycetia; o__Corynebacteriales; f__Mycobacteriaceae; g__Mycobacterium; s__Mycobacterium persicum	d__Bacteria; p__Actinomycetota; c__Actinomycetia; o__Mycobacteriales; f__Mycobacteriaceae; g__Mycobacterium; s__Mycobacterium persicum	TRUE	TRUE
GCF_002086695.1	Mycolicibacterium rhodesiae	d__Bacteria; p__Actinobacteria; c__Actinomycetia; o__Corynebacteriales; f__Mycobacteriaceae; g__Mycolicibacterium; s__Mycolicibacterium rhodesiae	d__Bacteria; p__Actinomycetota; c__Actinomycetia; o__Mycobacteriales; f__Mycobacteriaceae; g__Mycobacterium; s__Mycobacterium rhodesiae	TRUE	TRUE
GCF_002086715.1	Mycobacteroides saopaulense	d__Bacteria; p__Actinobacteria; c__Actinomycetia; o__Corynebacteriales; f__Mycobacteriaceae; g__Mycobacteroides; s__Mycobacteroides saopaulense	d__Bacteria; p__Actinomycetota; c__Actinomycetia; o__Mycobacteriales; f__Mycobacteriaceae; g__Mycobacterium; s__Mycobacterium saopaulense	FALSE	TRUE
GCF_002086735.1	Mycobacterium scrofulaceum	d__Bacteria; p__Actinobacteria; c__Actinomycetia; o__Corynebacteriales; f__Mycobacteriaceae; g__Mycobacterium; s__Mycobacterium scrofulaceum	d__Bacteria; p__Actinomycetota; c__Actinomycetia; o__Mycobacteriales; f__Mycobacteriaceae; g__Mycobacterium; s__Mycobacterium scrofulaceum	TRUE	TRUE
GCF_002086755.1	Mycobacterium shinjukuense	d__Bacteria; p__Actinobacteria; c__Actinomycetia; o__Corynebacteriales; f__Mycobacteriaceae; g__Mycobacterium; s__Mycobacterium shinjukuense	d__Bacteria; p__Actinomycetota; c__Actinomycetia; o__Mycobacteriales; f__Mycobacteriaceae; g__Mycobacterium; s__Mycobacterium shinjukuense	FALSE	TRUE
GCF_002086775.1	Mycobacterium timonense	d__Bacteria; p__Actinobacteria; c__Actinomycetia; o__Corynebacteriales; f__Mycobacteriaceae; g__Mycobacterium; s__Mycobacterium timonense	d__Bacteria; p__Actinomycetota; c__Actinomycetia; o__Mycobacteriales; f__Mycobacteriaceae; g__Mycobacterium; s__Mycobacterium avium	FALSE	TRUE
GCF_002086795.1	Mycolicibacterium tusciae	d__Bacteria; p__Actinobacteria; c__Actinomycetia; o__Corynebacteriales; f__Mycobacteriaceae; g__Mycolicibacterium; s__Mycolicibacterium tusciae	d__Bacteria; p__Actinomycetota; c__Actinomycetia; o__Mycobacteriales; f__Mycobacteriaceae; g__Mycobacterium; s__Mycobacterium tusciae	TRUE	TRUE
GCF_002086815.1	Mycolicibacterium parafortuitum	d__Bacteria; p__Actinobacteria; c__Actinomycetia; o__Corynebacteriales; f__Mycobacteriaceae; g__Mycolicibacterium; s__Mycolicibacterium parafortuitum	d__Bacteria; p__Actinomycetota; c__Actinomycetia; o__Mycobacteriales; f__Mycobacteriaceae; g__Mycobacterium; s__Mycobacterium parafortuitum	TRUE	TRUE
GCF_002101555.1	Mycolicibacterium canariasense	d__Bacteria; p__Actinobacteria; c__Actinomycetia; o__Corynebacteriales; f__Mycobacteriaceae; g__Mycolicibacterium; s__Mycolicibacterium canariasense	d__Bacteria; p__Actinomycetota; c__Actinomycetia; o__Mycobacteriales; f__Mycobacteriaceae; g__Mycobacterium; s__Mycobacterium canariasense	TRUE	TRUE
GCF_002101575.1	Mycobacterium intracellulare subsp. chimaera	d__Bacteria; p__Actinobacteria; c__Actinomycetia; o__Corynebacteriales; f__Mycobacteriaceae; g__Mycobacterium; s__Mycobacterium intracellulare	d__Bacteria; p__Actinomycetota; c__Actinomycetia; o__Mycobacteriales; f__Mycobacteriaceae; g__Mycobacterium; s__Mycobacterium intracellulare	FALSE	TRUE
GCF_002101585.1	Mycolicibacter engbaekii	d__Bacteria; p__Actinobacteria; c__Actinomycetia; o__Corynebacteriales; f__Mycobacteriaceae; g__Mycolicibacter; s__Mycolicibacter engbaekii	d__Bacteria; p__Actinomycetota; c__Actinomycetia; o__Mycobacteriales; f__Mycobacteriaceae; g__Mycobacterium; s__Mycobacterium engbaekii	TRUE	TRUE
GCF_002101595.1	Mycobacterium celatum	d__Bacteria; p__Actinobacteria; c__Actinomycetia; o__Corynebacteriales; f__Mycobacteriaceae; g__Mycobacterium; s__Mycobacterium celatum	d__Bacteria; p__Actinomycetota; c__Actinomycetia; o__Mycobacteriales; f__Mycobacteriaceae; g__Mycobacterium; s__Mycobacterium celatum	TRUE	TRUE
GCF_002101635.1	Mycobacterium florentinum	d__Bacteria; p__Actinobacteria; c__Actinomycetia; o__Corynebacteriales; f__Mycobacteriaceae; g__Mycobacterium; s__Mycobacterium florentinum	d__Bacteria; p__Actinomycetota; c__Actinomycetia; o__Mycobacteriales; f__Mycobacteriaceae; g__Mycobacterium; s__Mycobacterium florentinum	FALSE	TRUE
GCF_002101655.1	Mycolicibacter hiberniae	d__Bacteria; p__Actinobacteria; c__Actinomycetia; o__Corynebacteriales; f__Mycobacteriaceae; g__Mycolicibacter; s__Mycolicibacter hiberniae	d__Bacteria; p__Actinomycetota; c__Actinomycetia; o__Mycobacteriales; f__Mycobacteriaceae; g__Mycobacterium; s__Mycobacterium hiberniae	FALSE	TRUE
GCF_002101665.1	Mycobacteroides immunogenum	d__Bacteria; p__Actinobacteria; c__Actinomycetia; o__Corynebacteriales; f__Mycobacteriaceae; g__Mycobacteroides; s__Mycobacteroides immunogenum	d__Bacteria; p__Actinomycetota; c__Actinomycetia; o__Mycobacteriales; f__Mycobacteriaceae; g__Mycobacterium; s__Mycobacterium immunogenum	FALSE	TRUE
GCF_002101675.1	Mycobacterium gordonae	d__Bacteria; p__Actinobacteria; c__Actinomycetia; o__Corynebacteriales; f__Mycobacteriaceae; g__Mycobacterium; s__Mycobacterium gordonae	d__Bacteria; p__Actinomycetota; c__Actinomycetia; o__Mycobacteriales; f__Mycobacteriaceae; g__Mycobacterium; s__Mycobacterium gordonae	TRUE	TRUE
GCF_002101705.1	Mycolicibacterium iranicum	d__Bacteria; p__Actinobacteria; c__Actinomycetia; o__Corynebacteriales; f__Mycobacteriaceae; g__Mycolicibacterium; s__Mycolicibacterium iranicum	d__Bacteria; p__Actinomycetota; c__Actinomycetia; o__Mycobacteriales; f__Mycobacteriaceae; g__Mycobacterium; s__Mycobacterium iranicum	TRUE	TRUE
GCF_002101735.1	Mycobacterium kyorinense	d__Bacteria; p__Actinobacteria; c__Actinomycetia; o__Corynebacteriales; f__Mycobacteriaceae; g__Mycobacterium; s__Mycobacterium kyorinense	d__Bacteria; p__Actinomycetota; c__Actinomycetia; o__Mycobacteriales; f__Mycobacteriaceae; g__Mycobacterium; s__Mycobacterium kyorinense	TRUE	TRUE
GCF_002101745.1	Mycobacterium kubicae	d__Bacteria; p__Actinobacteria; c__Actinomycetia; o__Corynebacteriales; f__Mycobacteriaceae; g__Mycobacterium; s__Mycobacterium kubicae	d__Bacteria; p__Actinomycetota; c__Actinomycetia; o__Mycobacteriales; f__Mycobacteriaceae; g__Mycobacterium; s__Mycobacterium kubicae	FALSE	TRUE
GCF_002101775.1	Mycolicibacter nonchromogenicus	d__Bacteria; p__Actinobacteria; c__Actinomycetia; o__Corynebacteriales; f__Mycobacteriaceae; g__Mycolicibacter; s__Mycolicibacter nonchromogenicus	d__Bacteria; p__Actinomycetota; c__Actinomycetia; o__Mycobacteriales; f__Mycobacteriaceae; g__Mycobacterium; s__Mycobacterium nonchromogenicum	TRUE	TRUE
GCF_002101785.1	Mycobacterium palustre	d__Bacteria; p__Actinobacteria; c__Actinomycetia; o__Corynebacteriales; f__Mycobacteriaceae; g__Mycobacterium; s__Mycobacterium palustre	d__Bacteria; p__Actinomycetota; c__Actinomycetia; o__Mycobacteriales; f__Mycobacteriaceae; g__Mycobacterium; s__Mycobacterium palustre	TRUE	TRUE
GCF_002101815.1	Mycobacterium paraense	d__Bacteria; p__Actinobacteria; c__Actinomycetia; o__Corynebacteriales; f__Mycobacteriaceae; g__Mycobacterium; s__Mycobacterium paraense	d__Bacteria; p__Actinomycetota; c__Actinomycetia; o__Mycobacteriales; f__Mycobacteriaceae; g__Mycobacterium; s__Mycobacterium paraense	TRUE	TRUE
GCF_002101845.1	Mycobacterium riyadhense	d__Bacteria; p__Actinobacteria; c__Actinomycetia; o__Corynebacteriales; f__Mycobacteriaceae; g__Mycobacterium; s__Mycobacterium riyadhense	d__Bacteria; p__Actinomycetota; c__Actinomycetia; o__Mycobacteriales; f__Mycobacteriaceae; g__Mycobacterium; s__Mycobacterium riyadhense	TRUE	TRUE
GCF_002101875.1	Mycobacterium saskatchewanense	d__Bacteria; p__Actinobacteria; c__Actinomycetia; o__Corynebacteriales; f__Mycobacteriaceae; g__Mycobacterium; s__Mycobacterium saskatchewanense	d__Bacteria; p__Actinomycetota; c__Actinomycetia; o__Mycobacteriales; f__Mycobacteriaceae; g__Mycobacterium; s__Mycobacterium saskatchewanense	FALSE	TRUE
GCF_002101885.1	Mycolicibacter senuensis	d__Bacteria; p__Actinobacteria; c__Actinomycetia; o__Corynebacteriales; f__Mycobacteriaceae; g__Mycolicibacter; s__Mycolicibacter senuensis	d__Bacteria; p__Actinomycetota; c__Actinomycetia; o__Mycobacteriales; f__Mycobacteriaceae; g__Mycobacterium; s__Mycobacterium senuense	TRUE	TRUE
GCF_002101955.1	Mycolicibacter terrae	d__Bacteria; p__Actinobacteria; c__Actinomycetia; o__Corynebacteriales; f__Mycobacteriaceae; g__Mycolicibacter; s__Mycolicibacter terrae	d__Bacteria; p__Actinomycetota; c__Actinomycetia; o__Mycobacteriales; f__Mycobacteriaceae; g__Mycobacterium; s__Mycobacterium terrae	FALSE	TRUE
GCF_002101965.1	Mycolicibacterium wolinskyi	d__Bacteria; p__Actinobacteria; c__Actinomycetia; o__Corynebacteriales; f__Mycobacteriaceae; g__Mycolicibacterium; s__Mycolicibacterium wolinskyi	d__Bacteria; p__Actinomycetota; c__Actinomycetia; o__Mycobacteriales; f__Mycobacteriaceae; g__Mycobacterium; s__Mycobacterium wolinskyi	TRUE	TRUE
GCF_002101995.1	Mycolicibacterium fallax	d__Bacteria; p__Actinobacteria; c__Actinomycetia; o__Corynebacteriales; f__Mycobacteriaceae; g__Mycolicibacterium; s__Mycolicibacterium fallax	d__Bacteria; p__Actinomycetota; c__Actinomycetia; o__Mycobacteriales; f__Mycobacteriaceae; g__Mycobacterium; s__Mycobacterium fallax	FALSE	TRUE
GCF_002102015.1	Mycobacterium xenopi	d__Bacteria; p__Actinobacteria; c__Actinomycetia; o__Corynebacteriales; f__Mycobacteriaceae; g__Mycobacterium; s__Mycobacterium xenopi	d__Bacteria; p__Actinomycetota; c__Actinomycetia; o__Mycobacteriales; f__Mycobacteriaceae; g__Mycobacterium; s__Mycobacterium xenopi	FALSE	TRUE
GCF_002102025.1	Mycobacterium bohemicum	d__Bacteria; p__Actinobacteria; c__Actinomycetia; o__Corynebacteriales; f__Mycobacteriaceae; g__Mycobacterium; s__Mycobacterium bohemicum	d__Bacteria; p__Actinomycetota; c__Actinomycetia; o__Mycobacteriales; f__Mycobacteriaceae; g__Mycobacterium; s__Mycobacterium bohemicum	FALSE	TRUE
GCF_002102055.1	Mycobacteroides chelonae	d__Bacteria; p__Actinobacteria; c__Actinomycetia; o__Corynebacteriales; f__Mycobacteriaceae; g__Mycobacteroides; s__Mycobacteroides chelonae	d__Bacteria; p__Actinomycetota; c__Actinomycetia; o__Mycobacteriales; f__Mycobacteriaceae; g__Mycobacterium; s__Mycobacterium chelonae	FALSE	TRUE
GCF_002102065.1	Mycolicibacterium conceptionense	d__Bacteria; p__Actinobacteria; c__Actinomycetia; o__Corynebacteriales; f__Mycobacteriaceae; g__Mycolicibacterium; s__Mycolicibacterium conceptionense	d__Bacteria; p__Actinomycetota; c__Actinomycetia; o__Mycobacteriales; f__Mycobacteriaceae; g__Mycobacterium; s__Mycobacterium senegalense	FALSE	TRUE
GCF_002102095.1	Mycobacterium conspicuum	d__Bacteria; p__Actinobacteria; c__Actinomycetia; o__Corynebacteriales; f__Mycobacteriaceae; g__Mycobacterium; s__Mycobacterium conspicuum	d__Bacteria; p__Actinomycetota; c__Actinomycetia; o__Mycobacteriales; f__Mycobacteriaceae; g__Mycobacterium; s__Mycobacterium conspicuum	FALSE	TRUE
GCF_002102105.1	Mycolicibacterium confluentis	d__Bacteria; p__Actinobacteria; c__Actinomycetia; o__Corynebacteriales; f__Mycobacteriaceae; g__Mycolicibacterium; s__Mycolicibacterium confluentis	d__Bacteria; p__Actinomycetota; c__Actinomycetia; o__Mycobacteriales; f__Mycobacteriaceae; g__Mycobacterium; s__Mycobacterium confluentis	FALSE	TRUE
GCF_002102115.1	Mycobacterium doricum	d__Bacteria; p__Actinobacteria; c__Actinomycetia; o__Corynebacteriales; f__Mycobacteriaceae; g__Mycolicibacterium; s__Mycobacterium doricum	d__Bacteria; p__Actinomycetota; c__Actinomycetia; o__Mycobacteriales; f__Mycobacteriaceae; g__Mycobacterium; s__Mycobacterium doricum	FALSE	TRUE
GCF_002102155.1	Mycobacterium europaeum	d__Bacteria; p__Actinobacteria; c__Actinomycetia; o__Corynebacteriales; f__Mycobacteriaceae; g__Mycobacterium; s__Mycobacterium europaeum	d__Bacteria; p__Actinomycetota; c__Actinomycetia; o__Mycobacteriales; f__Mycobacteriaceae; g__Mycobacterium; s__Mycobacterium europaeum	TRUE	TRUE
GCF_002102175.1	Mycobacterium gastri	d__Bacteria; p__Actinobacteria; c__Actinomycetia; o__Corynebacteriales; f__Mycobacteriaceae; g__Mycobacterium; s__Mycobacterium gastri	d__Bacteria; p__Actinomycetota; c__Actinomycetia; o__Mycobacteriales; f__Mycobacteriaceae; g__Mycobacterium; s__Mycobacterium gastri	TRUE	TRUE
GCF_002102185.1	Mycobacterium fragae	d__Bacteria; p__Actinobacteria; c__Actinomycetia; o__Corynebacteriales; f__Mycobacteriaceae; g__Mycobacterium; s__Mycobacterium fragae	d__Bacteria; p__Actinomycetota; c__Actinomycetia; o__Mycobacteriales; f__Mycobacteriaceae; g__Mycobacterium; s__Mycobacterium fragae	TRUE	TRUE
GCF_002102215.1	Mycobacterium lacus	d__Bacteria; p__Actinobacteria; c__Actinomycetia; o__Corynebacteriales; f__Mycobacteriaceae; g__Mycobacterium; s__Mycobacterium lacus	d__Bacteria; p__Actinomycetota; c__Actinomycetia; o__Mycobacteriales; f__Mycobacteriaceae; g__Mycobacterium; s__Mycobacterium lacus	FALSE	TRUE
GCF_002102255.1	Mycobacterium nebraskense	d__Bacteria; p__Actinobacteria; c__Actinomycetia; o__Corynebacteriales; f__Mycobacteriaceae; g__Mycobacterium; s__Mycobacterium nebraskense	d__Bacteria; p__Actinomycetota; c__Actinomycetia; o__Mycobacteriales; f__Mycobacteriaceae; g__Mycobacterium; s__Mycobacterium nebraskense	TRUE	TRUE
GCF_002102265.1	Mycolicibacter longobardus	d__Bacteria; p__Actinobacteria; c__Actinomycetia; o__Corynebacteriales; f__Mycobacteriaceae; g__Mycolicibacter; s__Mycolicibacter longobardus	d__Bacteria; p__Actinomycetota; c__Actinomycetia; o__Mycobacteriales; f__Mycobacteriaceae; g__Mycobacterium; s__Mycobacterium longobardum	TRUE	TRUE
GCF_002102335.1	Mycobacterium parmense	d__Bacteria; p__Actinobacteria; c__Actinomycetia; o__Corynebacteriales; f__Mycobacteriaceae; g__Mycobacterium; s__Mycobacterium parmense	d__Bacteria; p__Actinomycetota; c__Actinomycetia; o__Mycobacteriales; f__Mycobacteriaceae; g__Mycobacterium; s__Mycobacterium parmense	FALSE	TRUE
GCF_002102345.1	Mycolicibacterium peregrinum	d__Bacteria; p__Actinobacteria; c__Actinomycetia; o__Corynebacteriales; f__Mycobacteriaceae; g__Mycolicibacterium; s__Mycolicibacterium peregrinum	d__Bacteria; p__Actinomycetota; c__Actinomycetia; o__Mycobacteriales; f__Mycobacteriaceae; g__Mycobacterium; s__Mycobacterium peregrinum	TRUE	TRUE
GCF_002102355.1	Mycobacterium sherrisii	d__Bacteria; p__Actinobacteria; c__Actinomycetia; o__Corynebacteriales; f__Mycobacteriaceae; g__Mycobacterium; s__Mycobacterium sherrisii	d__Bacteria; p__Actinomycetota; c__Actinomycetia; o__Mycobacteriales; f__Mycobacteriaceae; g__Mycobacterium; s__Mycobacterium sherrisii	TRUE	TRUE
GCF_002102395.1	Mycolicibacillus trivialis	d__Bacteria; p__Actinobacteria; c__Actinomycetia; o__Corynebacteriales; f__Mycobacteriaceae; g__Mycolicibacillus; s__Mycolicibacillus trivialis	d__Bacteria; p__Actinomycetota; c__Actinomycetia; o__Mycobacteriales; f__Mycobacteriaceae; g__Mycobacterium; s__Mycobacterium triviale	TRUE	TRUE
GCF_002102415.1	Mycobacterium triplex	d__Bacteria; p__Actinobacteria; c__Actinomycetia; o__Corynebacteriales; f__Mycobacteriaceae; g__Mycobacterium; s__Mycobacterium triplex	d__Bacteria; p__Actinomycetota; c__Actinomycetia; o__Mycobacteriales; f__Mycobacteriaceae; g__Mycobacterium; s__Mycobacterium triplex	FALSE	TRUE
GCF_002104675.1	Mycobacterium decipiens	d__Bacteria; p__Actinobacteria; c__Actinomycetia; o__Corynebacteriales; f__Mycobacteriaceae; g__Mycobacterium; s__Mycobacterium decipiens	d__Bacteria; p__Actinomycetota; c__Actinomycetia; o__Mycobacteriales; f__Mycobacteriaceae; g__Mycobacterium; s__Mycobacterium decipiens	TRUE	TRUE
GCF_002104735.1	Mycobacterium paraintracellulare	d__Bacteria; p__Actinobacteria; c__Actinomycetia; o__Corynebacteriales; f__Mycobacteriaceae; g__Mycobacterium; s__Mycobacterium paraintracellulare	d__Bacteria; p__Actinomycetota; c__Actinomycetia; o__Mycobacteriales; f__Mycobacteriaceae; g__Mycobacterium; s__Mycobacterium intracellulare	FALSE	TRUE
GCF_002104765.1	Mycobacterium vulneris	d__Bacteria; p__Actinobacteria; c__Actinomycetia; o__Corynebacteriales; f__Mycobacteriaceae; g__Mycobacterium; s__Mycobacterium vulneris	d__Bacteria; p__Actinomycetota; c__Actinomycetia; o__Mycobacteriales; f__Mycobacteriaceae; g__Mycobacterium; s__Mycobacterium vulneris	TRUE	TRUE
GCF_002104795.1	Mycobacterium koreense	d__Bacteria; p__Actinobacteria; c__Actinomycetia; o__Corynebacteriales; f__Mycobacteriaceae; g__Mycobacterium; s__Mycobacterium koreense	d__Bacteria; p__Actinomycetota; c__Actinomycetia; o__Mycobacteriales; f__Mycobacteriaceae; g__Mycobacterium; s__Mycobacterium koreense	TRUE	TRUE
GCF_002105755.1	Mycobacterium colombiense CECT 3035	d__Bacteria; p__Actinobacteria; c__Actinomycetia; o__Corynebacteriales; f__Mycobacteriaceae; g__Mycobacterium; s__Mycobacterium colombiense	d__Bacteria; p__Actinomycetota; c__Actinomycetia; o__Mycobacteriales; f__Mycobacteriaceae; g__Mycobacterium; s__Mycobacterium colombiense	TRUE	TRUE
GCF_002116635.1	Mycobacterium szulgai	d__Bacteria; p__Actinobacteria; c__Actinomycetia; o__Corynebacteriales; f__Mycobacteriaceae; g__Mycobacterium; s__Mycobacterium szulgai	d__Bacteria; p__Actinomycetota; c__Actinomycetia; o__Mycobacteriales; f__Mycobacteriaceae; g__Mycobacterium; s__Mycobacterium szulgai	TRUE	TRUE
GCF_002157835.1	Mycobacterium dioxanotrophicus	d__Bacteria; p__Actinobacteria; c__Actinomycetia; o__Corynebacteriales; f__Mycobacteriaceae; g__Mycobacterium; s__Mycobacterium dioxanotrophicus	d__Bacteria; p__Actinomycetota; c__Actinomycetia; o__Mycobacteriales; f__Mycobacteriaceae; g__Mycobacterium; s__Mycobacterium dioxanotrophicus	TRUE	TRUE
GCF_002219285.1	Mycobacterium intracellulare subsp. chimaera	d__Bacteria; p__Actinobacteria; c__Actinomycetia; o__Corynebacteriales; f__Mycobacteriaceae; g__Mycobacterium; s__Mycobacterium intracellulare	d__Bacteria; p__Actinomycetota; c__Actinomycetia; o__Mycobacteriales; f__Mycobacteriaceae; g__Mycobacterium; s__Mycobacterium intracellulare	FALSE	TRUE
GCF_002245535.1	Mycobacterium lehmannii	d__Bacteria; p__Actinobacteria; c__Actinomycetia; o__Corynebacteriales; f__Mycobacteriaceae; g__Mycobacterium; s__Mycobacterium lehmannii	d__Bacteria; p__Actinomycetota; c__Actinomycetia; o__Mycobacteriales; f__Mycobacteriaceae; g__Mycobacterium; s__Mycobacterium lehmannii	TRUE	TRUE
GCF_002245615.1	Mycobacterium neumannii	d__Bacteria; p__Actinobacteria; c__Actinomycetia; o__Corynebacteriales; f__Mycobacteriaceae; g__Mycobacterium; s__Mycobacterium neumannii	d__Bacteria; p__Actinomycetota; c__Actinomycetia; o__Mycobacteriales; f__Mycobacteriaceae; g__Mycobacterium; s__Mycobacterium flavescens	FALSE	TRUE
GCF_002250655.1	Mycolicibacterium sphagni	d__Bacteria; p__Actinobacteria; c__Actinomycetia; o__Corynebacteriales; f__Mycobacteriaceae; g__Mycolicibacterium; s__Mycolicibacterium sphagni	d__Bacteria; p__Actinomycetota; c__Actinomycetia; o__Mycobacteriales; f__Mycobacteriaceae; g__Mycobacterium; s__Mycobacterium sphagni	TRUE	TRUE
GCF_002356315.1	Mycobacterium shigaense	d__Bacteria; p__Actinobacteria; c__Actinomycetia; o__Corynebacteriales; f__Mycobacteriaceae; g__Mycobacterium; s__Mycobacterium shigaense	d__Bacteria; p__Actinomycetota; c__Actinomycetia; o__Mycobacteriales; f__Mycobacteriaceae; g__Mycobacterium; s__Mycobacterium shigaense	TRUE	TRUE
GCF_002356335.1	[Mycobacterium] stephanolepidis	d__Bacteria; p__Actinobacteria; c__Actinomycetia; o__Corynebacteriales; f__Mycobacteriaceae; g__Mycobacteroides; s__[Mycobacterium] stephanolepidis	d__Bacteria; p__Actinomycetota; c__Actinomycetia; o__Mycobacteriales; f__Mycobacteriaceae; g__Mycobacterium; s__Mycobacterium stephanolepidis	TRUE	TRUE
GCF_002553505.1	Mycolicibacterium agri	d__Bacteria; p__Actinobacteria; c__Actinomycetia; o__Corynebacteriales; f__Mycobacteriaceae; g__Mycolicibacterium; s__Mycolicibacterium agri	d__Bacteria; p__Actinomycetota; c__Actinomycetia; o__Mycobacteriales; f__Mycobacteriaceae; g__Mycobacterium; s__Mycobacterium agri	TRUE	TRUE
GCF_002591975.1	Mycobacterium neglectum	d__Bacteria; p__Actinobacteria; c__Actinomycetia; o__Corynebacteriales; f__Mycobacteriaceae; g__Mycobacterium; s__Mycobacterium neglectum	d__Bacteria; p__Actinomycetota; c__Actinomycetia; o__Mycobacteriales; f__Mycobacteriaceae; g__Mycobacterium; s__Mycobacterium neglectum	TRUE	TRUE
GCF_002592005.1	Mycobacterium palauense	d__Bacteria; p__Actinobacteria; c__Actinomycetia; o__Corynebacteriales; f__Mycobacteriaceae; g__Mycobacterium; s__Mycobacterium palauense	d__Bacteria; p__Actinomycetota; c__Actinomycetia; o__Mycobacteriales; f__Mycobacteriaceae; g__Mycobacterium; s__Mycobacterium palauense	TRUE	TRUE
GCF_002705925.1	Mycobacterium ostraviense	d__Bacteria; p__Actinobacteria; c__Actinomycetia; o__Corynebacteriales; f__Mycobacteriaceae; g__Mycobacterium; s__Mycobacterium ostraviense	d__Bacteria; p__Actinomycetota; c__Actinomycetia; o__Mycobacteriales; f__Mycobacteriaceae; g__Mycobacterium; s__Mycobacterium ostraviense	TRUE	TRUE
GCF_002982215.1	Mycobacterium tuberculosis variant microti	d__Bacteria; p__Actinobacteria; c__Actinomycetia; o__Corynebacteriales; f__Mycobacteriaceae; g__Mycobacterium; s__Mycobacterium tuberculosis	d__Bacteria; p__Actinomycetota; c__Actinomycetia; o__Mycobacteriales; f__Mycobacteriaceae; g__Mycobacterium; s__Mycobacterium tuberculosis	FALSE	TRUE
GCF_002982225.1	Mycobacterium tuberculosis variant caprae	d__Bacteria; p__Actinobacteria; c__Actinomycetia; o__Corynebacteriales; f__Mycobacteriaceae; g__Mycobacterium; s__Mycobacterium tuberculosis	d__Bacteria; p__Actinomycetota; c__Actinomycetia; o__Mycobacteriales; f__Mycobacteriaceae; g__Mycobacterium; s__Mycobacterium tuberculosis	FALSE	TRUE
GCF_002982275.1	Mycobacterium tuberculosis variant pinnipedii	d__Bacteria; p__Actinobacteria; c__Actinomycetia; o__Corynebacteriales; f__Mycobacteriaceae; g__Mycobacterium; s__Mycobacterium tuberculosis	d__Bacteria; p__Actinomycetota; c__Actinomycetia; o__Mycobacteriales; f__Mycobacteriaceae; g__Mycobacterium; s__Mycobacterium tuberculosis	FALSE	TRUE
GCF_002982285.1	Mycobacterium tuberculosis variant bovis	d__Bacteria; p__Actinobacteria; c__Actinomycetia; o__Corynebacteriales; f__Mycobacteriaceae; g__Mycobacterium; s__Mycobacterium tuberculosis	d__Bacteria; p__Actinomycetota; c__Actinomycetia; o__Mycobacteriales; f__Mycobacteriaceae; g__Mycobacterium; s__Mycobacterium tuberculosis	FALSE	TRUE
GCF_002982335.1	Mycobacterium tuberculosis variant africanum	d__Bacteria; p__Actinobacteria; c__Actinomycetia; o__Corynebacteriales; f__Mycobacteriaceae; g__Mycobacterium; s__Mycobacterium tuberculosis	d__Bacteria; p__Actinomycetota; c__Actinomycetia; o__Mycobacteriales; f__Mycobacteriaceae; g__Mycobacterium; s__Mycobacterium tuberculosis	FALSE	TRUE
GCF_002983495.1	Mycobacterium shigaense	d__Bacteria; p__Actinobacteria; c__Actinomycetia; o__Corynebacteriales; f__Mycobacteriaceae; g__Mycobacterium; s__Mycobacterium shigaense	d__Bacteria; p__Actinomycetota; c__Actinomycetia; o__Mycobacteriales; f__Mycobacteriaceae; g__Mycobacterium; s__Mycobacterium shigaense	FALSE	TRUE
GCF_003254575.1	Mycobacterium kyogaense	d__Bacteria; p__Actinobacteria; c__Actinomycetia; o__Corynebacteriales; f__Mycobacteriaceae; g__Mycobacterium; s__Mycobacterium kyogaense	d__Bacteria; p__Actinomycetota; c__Actinomycetia; o__Mycobacteriales; f__Mycobacteriaceae; g__Mycobacterium; s__Mycobacterium kyogaense	TRUE	TRUE
GCF_003266045.1	Mycobacterium tuberculosis H37Rv	d__Bacteria; p__Actinobacteria; c__Actinomycetia; o__Corynebacteriales; f__Mycobacteriaceae; g__Mycobacterium; s__Mycobacterium tuberculosis	d__Bacteria; p__Actinomycetota; c__Actinomycetia; o__Mycobacteriales; f__Mycobacteriaceae; g__Mycobacterium; s__Mycobacterium tuberculosis	FALSE	TRUE
GCF_003347205.1	Mycolicibacterium moriokaense	d__Bacteria; p__Actinobacteria; c__Actinomycetia; o__Corynebacteriales; f__Mycobacteriaceae; g__Mycolicibacterium; s__Mycolicibacterium moriokaense	d__Bacteria; p__Actinomycetota; c__Actinomycetia; o__Mycobacteriales; f__Mycobacteriaceae; g__Mycobacterium; s__Mycobacterium moriokaense_B	TRUE	TRUE
GCF_003390495.1	[Mycobacterium] chelonae subsp. gwanakae	d__Bacteria; p__Actinobacteria; c__Actinomycetia; o__Corynebacteriales; f__Mycobacteriaceae; g__Mycobacteroides; s__Mycobacteroides chelonae	d__Bacteria; p__Actinomycetota; c__Actinomycetia; o__Mycobacteriales; f__Mycobacteriaceae; g__Mycobacterium; s__Mycobacterium chelonae	FALSE	TRUE
GCF_003391395.1	Mycobacterium marinum	d__Bacteria; p__Actinobacteria; c__Actinomycetia; o__Corynebacteriales; f__Mycobacteriaceae; g__Mycobacterium; s__Mycobacterium marinum	d__Bacteria; p__Actinomycetota; c__Actinomycetia; o__Mycobacteriales; f__Mycobacteriaceae; g__Mycobacterium; s__Mycobacterium marinum	TRUE	TRUE
GCF_003431645.1	Mycobacterium marinum	d__Bacteria; p__Actinobacteria; c__Actinomycetia; o__Corynebacteriales; f__Mycobacteriaceae; g__Mycobacterium; s__Mycobacterium marinum	d__Bacteria; p__Actinomycetota; c__Actinomycetia; o__Mycobacteriales; f__Mycobacteriaceae; g__Mycobacterium; s__Mycobacterium marinum	FALSE	TRUE
GCF_003431655.1	Mycobacterium marinum	d__Bacteria; p__Actinobacteria; c__Actinomycetia; o__Corynebacteriales; f__Mycobacteriaceae; g__Mycobacterium; s__Mycobacterium marinum	d__Bacteria; p__Actinomycetota; c__Actinomycetia; o__Mycobacteriales; f__Mycobacteriaceae; g__Mycobacterium; s__Mycobacterium marinum	FALSE	TRUE
GCF_003584745.1	Mycobacterium pseudoshottsii JCM 15466	d__Bacteria; p__Actinobacteria; c__Actinomycetia; o__Corynebacteriales; f__Mycobacteriaceae; g__Mycobacterium; s__Mycobacterium pseudoshottsii	d__Bacteria; p__Actinomycetota; c__Actinomycetia; o__Mycobacteriales; f__Mycobacteriaceae; g__Mycobacterium; s__Mycobacterium marinum	FALSE	TRUE
GCF_003609715.1	Mycobacteroides abscessus subsp. bolletii BD	d__Bacteria; p__Actinobacteria; c__Actinomycetia; o__Corynebacteriales; f__Mycobacteriaceae; g__Mycobacteroides; s__Mycobacteroides abscessus	d__Bacteria; p__Actinomycetota; c__Actinomycetia; o__Mycobacteriales; f__Mycobacteriaceae; g__Mycobacterium; s__Mycobacterium abscessus	FALSE	TRUE
GCF_003614435.1	Mycobacterium paragordonae	d__Bacteria; p__Actinobacteria; c__Actinomycetia; o__Corynebacteriales; f__Mycobacteriaceae; g__Mycobacterium; s__Mycobacterium paragordonae	d__Bacteria; p__Actinomycetota; c__Actinomycetia; o__Mycobacteriales; f__Mycobacteriaceae; g__Mycobacterium; s__Mycobacterium paragordonae	TRUE	TRUE
GCF_003719305.1	Mycolicibacterium stellerae	d__Bacteria; p__Actinobacteria; c__Actinomycetia; o__Corynebacteriales; f__Mycobacteriaceae; g__Mycolicibacterium; s__Mycolicibacterium stellerae	d__Bacteria; p__Actinomycetota; c__Actinomycetia; o__Mycobacteriales; f__Mycobacteriaceae; g__Mycobacterium; s__Mycobacterium stellerae	TRUE	TRUE
GCF_003855255.1	Mycolicibacterium nivoides	d__Bacteria; p__Actinobacteria; c__Actinomycetia; o__Corynebacteriales; f__Mycobacteriaceae; g__Mycolicibacterium; s__Mycolicibacterium nivoides	d__Bacteria; p__Actinomycetota; c__Actinomycetia; o__Mycobacteriales; f__Mycobacteriaceae; g__Mycobacterium; s__Mycobacterium septicum	FALSE	TRUE
GCF_004014795.1	Mycolicibacterium brumae DSM 44177	d__Bacteria; p__Actinobacteria; c__Actinomycetia; o__Corynebacteriales; f__Mycobacteriaceae; g__Mycolicibacterium; s__Mycolicibacterium brumae	d__Bacteria; p__Actinomycetota; c__Actinomycetia; o__Mycobacteriales; f__Mycobacteriaceae; g__Mycobacterium; s__Mycobacterium brumae	TRUE	TRUE
GCF_004014805.1	Mycolicibacterium elephantis DSM 44368	d__Bacteria; p__Actinobacteria; c__Actinomycetia; o__Corynebacteriales; f__Mycobacteriaceae; g__Mycolicibacterium; s__Mycolicibacterium elephantis	d__Bacteria; p__Actinomycetota; c__Actinomycetia; o__Mycobacteriales; f__Mycobacteriaceae; g__Mycobacterium; s__Mycobacterium elephantis	TRUE	TRUE
GCF_004355025.1	Mycobacteroides franklinii	d__Bacteria; p__Actinobacteria; c__Actinomycetia; o__Corynebacteriales; f__Mycobacteriaceae; g__Mycobacteroides; s__Mycobacteroides franklinii	d__Bacteria; p__Actinomycetota; c__Actinomycetia; o__Mycobacteriales; f__Mycobacteriaceae; g__Mycobacterium; s__Mycobacterium franklinii	FALSE	TRUE
GCF_004355245.1	[Mycobacterium] chelonae subsp. chelonae	d__Bacteria; p__Actinobacteria; c__Actinomycetia; o__Corynebacteriales; f__Mycobacteriaceae; g__Mycobacteroides; s__Mycobacteroides chelonae	d__Bacteria; p__Actinomycetota; c__Actinomycetia; o__Mycobacteriales; f__Mycobacteriaceae; g__Mycobacterium; s__Mycobacterium chelonae	FALSE	TRUE
GCF_004366555.1	Mycolicibacterium litorale	d__Bacteria; p__Actinobacteria; c__Actinomycetia; o__Corynebacteriales; f__Mycobacteriaceae; g__Mycolicibacterium; s__Mycolicibacterium litorale	d__Bacteria; p__Actinomycetota; c__Actinomycetia; o__Mycobacteriales; f__Mycobacteriaceae; g__Mycobacterium; s__Mycobacterium litorale	FALSE	TRUE
GCF_004924335.1	Mycobacteroides salmoniphilum	d__Bacteria; p__Actinobacteria; c__Actinomycetia; o__Corynebacteriales; f__Mycobacteriaceae; g__Mycobacteroides; s__Mycobacteroides salmoniphilum	d__Bacteria; p__Actinomycetota; c__Actinomycetia; o__Mycobacteriales; f__Mycobacteriaceae; g__Mycobacterium; s__Mycobacterium salmoniphilum	TRUE	TRUE
GCF_005670605.1	Mycolicibacterium neoaurum	d__Bacteria; p__Actinobacteria; c__Actinomycetia; o__Corynebacteriales; f__Mycobacteriaceae; g__Mycolicibacterium; s__Mycolicibacterium neoaurum	d__Bacteria; p__Actinomycetota; c__Actinomycetia; o__Mycobacteriales; f__Mycobacteriaceae; g__Mycobacterium; s__Mycobacterium neoaurum	FALSE	TRUE
GCF_005670655.1	Mycolicibacterium phocaicum	d__Bacteria; p__Actinobacteria; c__Actinomycetia; o__Corynebacteriales; f__Mycobacteriaceae; g__Mycolicibacterium; s__Mycolicibacterium phocaicum	d__Bacteria; p__Actinomycetota; c__Actinomycetia; o__Mycobacteriales; f__Mycobacteriaceae; g__Mycobacterium; s__Mycobacterium phocaicum	FALSE	TRUE
GCF_005670675.1	Mycolicibacterium cosmeticum	d__Bacteria; p__Actinobacteria; c__Actinomycetia; o__Corynebacteriales; f__Mycobacteriaceae; g__Mycolicibacterium; s__Mycolicibacterium cosmeticum	d__Bacteria; p__Actinomycetota; c__Actinomycetia; o__Mycobacteriales; f__Mycobacteriaceae; g__Mycobacterium; s__Mycobacterium cosmeticum	FALSE	TRUE
GCF_005670695.1	Mycolicibacterium aubagnense	d__Bacteria; p__Actinobacteria; c__Actinomycetia; o__Corynebacteriales; f__Mycobacteriaceae; g__Mycolicibacterium; s__Mycolicibacterium aubagnense	d__Bacteria; p__Actinomycetota; c__Actinomycetia; o__Mycobacteriales; f__Mycobacteriaceae; g__Mycobacterium; s__Mycobacterium aubagnense	FALSE	TRUE
GCF_006409125.1	Mycobacteroides abscessus subsp. bolletii	d__Bacteria; p__Actinobacteria; c__Actinomycetia; o__Corynebacteriales; f__Mycobacteriaceae; g__Mycobacteroides; s__Mycobacteroides abscessus	d__Bacteria; p__Actinomycetota; c__Actinomycetia; o__Mycobacteriales; f__Mycobacteriaceae; g__Mycobacterium; s__Mycobacterium abscessus	FALSE	TRUE
GCF_007714205.1	Mycobacterium helveticum	d__Bacteria; p__Actinobacteria; c__Actinomycetia; o__Corynebacteriales; f__Mycobacteriaceae; g__Mycobacterium; s__Mycobacterium helveticum	d__Bacteria; p__Actinomycetota; c__Actinomycetia; o__Mycobacteriales; f__Mycobacteriaceae; g__Mycobacterium; s__Mycobacterium helveticum	TRUE	TRUE
GCF_008329645.1	Mycobacterium grossiae	d__Bacteria; p__Actinobacteria; c__Actinomycetia; o__Corynebacteriales; f__Mycobacteriaceae; g__Mycobacterium; s__Mycobacterium grossiae	d__Bacteria; p__Actinomycetota; c__Actinomycetia; o__Mycobacteriales; f__Mycobacteriaceae; g__Mycobacterium; s__Mycobacterium grossiae	TRUE	TRUE
GCF_009192875.1	Mycolicibacterium phlei DSM 43239 = CCUG 21000	d__Bacteria; p__Actinobacteria; c__Actinomycetia; o__Corynebacteriales; f__Mycobacteriaceae; g__Mycolicibacterium; s__Mycolicibacterium phlei	d__Bacteria; p__Actinomycetota; c__Actinomycetia; o__Mycobacteriales; f__Mycobacteriaceae; g__Mycobacterium; s__Mycobacterium phlei	FALSE	TRUE
GCF_009741445.1	Mycobacterium avium subsp. avium	d__Bacteria; p__Actinobacteria; c__Actinomycetia; o__Corynebacteriales; f__Mycobacteriaceae; g__Mycobacterium; s__Mycobacterium avium	d__Bacteria; p__Actinomycetota; c__Actinomycetia; o__Mycobacteriales; f__Mycobacteriaceae; g__Mycobacterium; s__Mycobacterium avium	TRUE	TRUE
GCF_009931355.1	Mycolicibacterium monacense DSM 44395	d__Bacteria; p__Actinobacteria; c__Actinomycetia; o__Corynebacteriales; f__Mycobacteriaceae; g__Mycolicibacterium; s__Mycolicibacterium monacense	d__Bacteria; p__Actinomycetota; c__Actinomycetia; o__Mycobacteriales; f__Mycobacteriaceae; g__Mycobacterium; s__Mycobacterium monacense	FALSE	TRUE
GCF_009936235.1	Mycobacterium xenopi	d__Bacteria; p__Actinobacteria; c__Actinomycetia; o__Corynebacteriales; f__Mycobacteriaceae; g__Mycobacterium; s__Mycobacterium xenopi	d__Bacteria; p__Actinomycetota; c__Actinomycetia; o__Mycobacteriales; f__Mycobacteriaceae; g__Mycobacterium; s__Mycobacterium xenopi	TRUE	TRUE
GCF_010093495.1	Mycolicibacter kumamotonensis	d__Bacteria; p__Actinobacteria; c__Actinomycetia; o__Corynebacteriales; f__Mycobacteriaceae; g__Mycolicibacter; s__Mycolicibacter kumamotonensis	d__Bacteria; p__Actinomycetota; c__Actinomycetia; o__Mycobacteriales; f__Mycobacteriaceae; g__Mycobacterium; s__Mycobacterium kumamotonense	FALSE	TRUE
GCF_010722915.1	Mycolicibacterium agri	d__Bacteria; p__Actinobacteria; c__Actinomycetia; o__Corynebacteriales; f__Mycobacteriaceae; g__Mycolicibacterium; s__Mycolicibacterium agri	d__Bacteria; p__Actinomycetota; c__Actinomycetia; o__Mycobacteriales; f__Mycobacteriaceae; g__Mycobacterium; s__Mycobacterium agri	FALSE	TRUE
GCF_010722995.1	Mycolicibacterium murale	d__Bacteria; p__Actinobacteria; c__Actinomycetia; o__Corynebacteriales; f__Mycobacteriaceae; g__Mycolicibacterium; s__Mycolicibacterium murale	d__Bacteria; p__Actinomycetota; c__Actinomycetia; o__Mycobacteriales; f__Mycobacteriaceae; g__Mycobacterium; s__Mycobacterium tokaiense	FALSE	TRUE
GCF_010723135.1	Mycobacterium kubicae	d__Bacteria; p__Actinobacteria; c__Actinomycetia; o__Corynebacteriales; f__Mycobacteriaceae; g__Mycobacterium; s__Mycobacterium kubicae	d__Bacteria; p__Actinomycetota; c__Actinomycetia; o__Mycobacteriales; f__Mycobacteriaceae; g__Mycobacterium; s__Mycobacterium kubicae	FALSE	TRUE
GCF_010723225.1	Mycolicibacter senuensis	d__Bacteria; p__Actinobacteria; c__Actinomycetia; o__Corynebacteriales; f__Mycobacteriaceae; g__Mycolicibacter; s__Mycolicibacter senuensis	d__Bacteria; p__Actinomycetota; c__Actinomycetia; o__Mycobacteriales; f__Mycobacteriaceae; g__Mycobacterium; s__Mycobacterium senuense	FALSE	TRUE
GCF_010723305.1	Mycobacterium botniense	d__Bacteria; p__Actinobacteria; c__Actinomycetia; o__Corynebacteriales; f__Mycobacteriaceae; g__Mycobacterium; s__Mycobacterium botniense	d__Bacteria; p__Actinomycetota; c__Actinomycetia; o__Mycobacteriales; f__Mycobacteriaceae; g__Mycobacterium; s__Mycobacterium botniense	TRUE	TRUE
GCF_010723415.1	Mycobacterium paragordonae	d__Bacteria; p__Actinobacteria; c__Actinomycetia; o__Corynebacteriales; f__Mycobacteriaceae; g__Mycobacterium; s__Mycobacterium paragordonae	d__Bacteria; p__Actinomycetota; c__Actinomycetia; o__Mycobacteriales; f__Mycobacteriaceae; g__Mycobacterium; s__Mycobacterium paragordonae	FALSE	TRUE
GCF_010725485.1	Mycolicibacterium parafortuitum	d__Bacteria; p__Actinobacteria; c__Actinomycetia; o__Corynebacteriales; f__Mycobacteriaceae; g__Mycolicibacterium; s__Mycolicibacterium parafortuitum	d__Bacteria; p__Actinomycetota; c__Actinomycetia; o__Mycobacteriales; f__Mycobacteriaceae; g__Mycobacterium; s__Mycobacterium sp002946335	TRUE	TRUE
GCF_010725725.1	Mycolicibacterium pulveris	d__Bacteria; p__Actinobacteria; c__Actinomycetia; o__Corynebacteriales; f__Mycobacteriaceae; g__Mycolicibacterium; s__Mycolicibacterium pulveris	d__Bacteria; p__Actinomycetota; c__Actinomycetia; o__Mycobacteriales; f__Mycobacteriaceae; g__Mycobacterium; s__Mycobacterium pulveris	TRUE	TRUE
GCF_010725885.1	Mycolicibacterium tokaiense	d__Bacteria; p__Actinobacteria; c__Actinomycetia; o__Corynebacteriales; f__Mycobacteriaceae; g__Mycolicibacterium; s__Mycolicibacterium tokaiense	d__Bacteria; p__Actinomycetota; c__Actinomycetia; o__Mycobacteriales; f__Mycobacteriaceae; g__Mycobacterium; s__Mycobacterium tokaiense	TRUE	TRUE
GCF_010726085.1	Mycolicibacterium moriokaense	d__Bacteria; p__Actinobacteria; c__Actinomycetia; o__Corynebacteriales; f__Mycobacteriaceae; g__Mycolicibacterium; s__Mycolicibacterium moriokaense	d__Bacteria; p__Actinomycetota; c__Actinomycetia; o__Mycobacteriales; f__Mycobacteriaceae; g__Mycobacterium; s__Mycobacterium moriokaense	TRUE	TRUE
GCF_010726245.1	Mycolicibacterium aichiense	d__Bacteria; p__Actinobacteria; c__Actinomycetia; o__Corynebacteriales; f__Mycobacteriaceae; g__Mycolicibacterium; s__Mycolicibacterium aichiense	d__Bacteria; p__Actinomycetota; c__Actinomycetia; o__Mycobacteriales; f__Mycobacteriaceae; g__Mycobacterium; s__Mycobacterium aichiense	TRUE	TRUE
GCF_010726505.1	Mycobacterium novum	d__Bacteria; p__Actinobacteria; c__Actinomycetia; o__Corynebacteriales; f__Mycobacteriaceae; g__Mycobacterium; s__Mycobacterium novum	d__Bacteria; p__Actinomycetota; c__Actinomycetia; o__Mycobacteriales; f__Mycobacteriaceae; g__Mycobacterium; s__Mycobacterium algericum	FALSE	TRUE
GCF_010726645.1	Mycolicibacterium duvalii	d__Bacteria; p__Actinobacteria; c__Actinomycetia; o__Corynebacteriales; f__Mycobacteriaceae; g__Mycolicibacterium; s__Mycolicibacterium duvalii	d__Bacteria; p__Actinomycetota; c__Actinomycetia; o__Mycobacteriales; f__Mycobacteriaceae; g__Mycobacterium; s__Mycobacterium duvalii	TRUE	TRUE
GCF_010726955.1	Mycolicibacterium fallax	d__Bacteria; p__Actinobacteria; c__Actinomycetia; o__Corynebacteriales; f__Mycobacteriaceae; g__Mycolicibacterium; s__Mycolicibacterium fallax	d__Bacteria; p__Actinomycetota; c__Actinomycetia; o__Mycobacteriales; f__Mycobacteriaceae; g__Mycobacterium; s__Mycobacterium fallax	TRUE	TRUE
GCF_010727125.1	Mycolicibacter terrae	d__Bacteria; p__Actinobacteria; c__Actinomycetia; o__Corynebacteriales; f__Mycobacteriaceae; g__Mycolicibacter; s__Mycolicibacter terrae	d__Bacteria; p__Actinomycetota; c__Actinomycetia; o__Mycobacteriales; f__Mycobacteriaceae; g__Mycobacterium; s__Mycobacterium terrae	TRUE	TRUE
GCF_010727325.1	Mycolicibacterium alvei	d__Bacteria; p__Actinobacteria; c__Actinomycetia; o__Corynebacteriales; f__Mycobacteriaceae; g__Mycolicibacterium; s__Mycolicibacterium alvei	d__Bacteria; p__Actinomycetota; c__Actinomycetia; o__Mycobacteriales; f__Mycobacteriaceae; g__Mycobacterium; s__Mycobacterium alvei	TRUE	TRUE
GCF_010727475.1	Mycolicibacterium mageritense	d__Bacteria; p__Actinobacteria; c__Actinomycetia; o__Corynebacteriales; f__Mycobacteriaceae; g__Mycolicibacterium; s__Mycolicibacterium mageritense	d__Bacteria; p__Actinomycetota; c__Actinomycetia; o__Mycobacteriales; f__Mycobacteriaceae; g__Mycobacterium; s__Mycobacterium mageritense	TRUE	TRUE
GCF_010727605.1	Mycobacterium simiae	d__Bacteria; p__Actinobacteria; c__Actinomycetia; o__Corynebacteriales; f__Mycobacteriaceae; g__Mycobacterium; s__Mycobacterium simiae	d__Bacteria; p__Actinomycetota; c__Actinomycetia; o__Mycobacteriales; f__Mycobacteriaceae; g__Mycobacterium; s__Mycobacterium simiae	TRUE	TRUE
GCF_010727725.1	Mycolicibacterium chitae	d__Bacteria; p__Actinobacteria; c__Actinomycetia; o__Corynebacteriales; f__Mycobacteriaceae; g__Mycolicibacterium; s__Mycolicibacterium chitae	d__Bacteria; p__Actinomycetota; c__Actinomycetia; o__Mycobacteriales; f__Mycobacteriaceae; g__Mycobacterium; s__Mycobacterium chitae	FALSE	TRUE
GCF_010727945.1	Mycobacterium cookii	d__Bacteria; p__Actinobacteria; c__Actinomycetia; o__Corynebacteriales; f__Mycobacteriaceae; g__Mycobacterium; s__Mycobacterium cookii	d__Bacteria; p__Actinomycetota; c__Actinomycetia; o__Mycobacteriales; f__Mycobacteriaceae; g__Mycobacterium; s__Mycobacterium cookii	TRUE	TRUE
GCF_010728155.1	Mycobacterium doricum	d__Bacteria; p__Actinobacteria; c__Actinomycetia; o__Corynebacteriales; f__Mycobacteriaceae; g__Mycolicibacterium; s__Mycobacterium doricum	d__Bacteria; p__Actinomycetota; c__Actinomycetia; o__Mycobacteriales; f__Mycobacteriaceae; g__Mycobacterium; s__Mycobacterium doricum	TRUE	TRUE
GCF_010728325.1	Mycolicibacterium poriferae	d__Bacteria; p__Actinobacteria; c__Actinomycetia; o__Corynebacteriales; f__Mycobacteriaceae; g__Mycolicibacterium; s__Mycolicibacterium poriferae	d__Bacteria; p__Actinomycetota; c__Actinomycetia; o__Mycobacteriales; f__Mycobacteriaceae; g__Mycobacterium; s__Mycobacterium poriferae	TRUE	TRUE
GCF_010728525.1	Mycobacterium shottsii	d__Bacteria; p__Actinobacteria; c__Actinomycetia; o__Corynebacteriales; f__Mycobacteriaceae; g__Mycobacterium; s__Mycobacterium shottsii	d__Bacteria; p__Actinomycetota; c__Actinomycetia; o__Mycobacteriales; f__Mycobacteriaceae; g__Mycobacterium; s__Mycobacterium marinum	FALSE	TRUE
GCF_010728725.1	Mycobacterium branderi	d__Bacteria; p__Actinobacteria; c__Actinomycetia; o__Corynebacteriales; f__Mycobacteriaceae; g__Mycobacterium; s__Mycobacterium branderi	d__Bacteria; p__Actinomycetota; c__Actinomycetia; o__Mycobacteriales; f__Mycobacteriaceae; g__Mycobacterium; s__Mycobacterium branderi	TRUE	TRUE
GCF_010728925.1	Mycolicibacterium gadium	d__Bacteria; p__Actinobacteria; c__Actinomycetia; o__Corynebacteriales; f__Mycobacteriaceae; g__Mycolicibacterium; s__Mycolicibacterium gadium	d__Bacteria; p__Actinomycetota; c__Actinomycetia; o__Mycobacteriales; f__Mycobacteriaceae; g__Mycobacterium; s__Mycobacterium gadium	TRUE	TRUE
GCF_010729105.1	Mycobacterium saskatchewanense	d__Bacteria; p__Actinobacteria; c__Actinomycetia; o__Corynebacteriales; f__Mycobacteriaceae; g__Mycobacterium; s__Mycobacterium saskatchewanense	d__Bacteria; p__Actinomycetota; c__Actinomycetia; o__Mycobacteriales; f__Mycobacteriaceae; g__Mycobacterium; s__Mycobacterium saskatchewanense	TRUE	TRUE
GCF_010729305.1	Mycolicibacterium psychrotolerans	d__Bacteria; p__Actinobacteria; c__Actinomycetia; o__Corynebacteriales; f__Mycobacteriaceae; g__Mycolicibacterium; s__Mycolicibacterium psychrotolerans	d__Bacteria; p__Actinomycetota; c__Actinomycetia; o__Mycobacteriales; f__Mycobacteriaceae; g__Mycobacterium; s__Mycobacterium psychrotolerans	TRUE	TRUE
GCF_010729485.1	Mycolicibacter hiberniae	d__Bacteria; p__Actinobacteria; c__Actinomycetia; o__Corynebacteriales; f__Mycobacteriaceae; g__Mycolicibacter; s__Mycolicibacter hiberniae	d__Bacteria; p__Actinomycetota; c__Actinomycetia; o__Mycobacteriales; f__Mycobacteriaceae; g__Mycobacterium; s__Mycobacterium hiberniae	TRUE	TRUE
GCF_010729665.1	Mycolicibacterium madagascariense	d__Bacteria; p__Actinobacteria; c__Actinomycetia; o__Corynebacteriales; f__Mycobacteriaceae; g__Mycolicibacterium; s__Mycolicibacterium madagascariense	d__Bacteria; p__Actinomycetota; c__Actinomycetia; o__Mycobacteriales; f__Mycobacteriaceae; g__Mycobacterium; s__Mycobacterium madagascariense	TRUE	TRUE
GCF_010729895.1	Mycolicibacterium confluentis	d__Bacteria; p__Actinobacteria; c__Actinomycetia; o__Corynebacteriales; f__Mycobacteriaceae; g__Mycolicibacterium; s__Mycolicibacterium confluentis	d__Bacteria; p__Actinomycetota; c__Actinomycetia; o__Mycobacteriales; f__Mycobacteriaceae; g__Mycobacterium; s__Mycobacterium confluentis	TRUE	TRUE
GCF_010730055.1	Mycobacterium shinjukuense	d__Bacteria; p__Actinobacteria; c__Actinomycetia; o__Corynebacteriales; f__Mycobacteriaceae; g__Mycobacterium; s__Mycobacterium shinjukuense	d__Bacteria; p__Actinomycetota; c__Actinomycetia; o__Mycobacteriales; f__Mycobacteriaceae; g__Mycobacterium; s__Mycobacterium shinjukuense	TRUE	TRUE
GCF_010730195.1	Mycobacterium conspicuum	d__Bacteria; p__Actinobacteria; c__Actinomycetia; o__Corynebacteriales; f__Mycobacteriaceae; g__Mycobacterium; s__Mycobacterium conspicuum	d__Bacteria; p__Actinomycetota; c__Actinomycetia; o__Mycobacteriales; f__Mycobacteriaceae; g__Mycobacterium; s__Mycobacterium conspicuum	TRUE	TRUE
GCF_010730355.1	Mycobacterium florentinum	d__Bacteria; p__Actinobacteria; c__Actinomycetia; o__Corynebacteriales; f__Mycobacteriaceae; g__Mycobacterium; s__Mycobacterium florentinum	d__Bacteria; p__Actinomycetota; c__Actinomycetia; o__Mycobacteriales; f__Mycobacteriaceae; g__Mycobacterium; s__Mycobacterium florentinum	TRUE	TRUE
GCF_010730575.1	Mycobacterium parmense	d__Bacteria; p__Actinobacteria; c__Actinomycetia; o__Corynebacteriales; f__Mycobacteriaceae; g__Mycobacterium; s__Mycobacterium parmense	d__Bacteria; p__Actinomycetota; c__Actinomycetia; o__Mycobacteriales; f__Mycobacteriaceae; g__Mycobacterium; s__Mycobacterium parmense	TRUE	TRUE
GCF_010730745.1	Mycobacterium heidelbergense	d__Bacteria; p__Actinobacteria; c__Actinomycetia; o__Corynebacteriales; f__Mycobacteriaceae; g__Mycobacterium; s__Mycobacterium heidelbergense	d__Bacteria; p__Actinomycetota; c__Actinomycetia; o__Mycobacteriales; f__Mycobacteriaceae; g__Mycobacterium; s__Mycobacterium heidelbergense	TRUE	TRUE
GCF_010731115.1	Mycolicibacterium phocaicum	d__Bacteria; p__Actinobacteria; c__Actinomycetia; o__Corynebacteriales; f__Mycobacteriaceae; g__Mycolicibacterium; s__Mycolicibacterium phocaicum	d__Bacteria; p__Actinomycetota; c__Actinomycetia; o__Mycobacteriales; f__Mycobacteriaceae; g__Mycobacterium; s__Mycobacterium phocaicum	TRUE	TRUE
GCF_010731295.1	Mycolicibacterium boenickei	d__Bacteria; p__Actinobacteria; c__Actinomycetia; o__Corynebacteriales; f__Mycobacteriaceae; g__Mycolicibacterium; s__Mycolicibacterium boenickei	d__Bacteria; p__Actinomycetota; c__Actinomycetia; o__Mycobacteriales; f__Mycobacteriaceae; g__Mycobacterium; s__Mycobacterium boenickei	TRUE	TRUE
GCF_010731535.1	Mycobacterium lacus	d__Bacteria; p__Actinobacteria; c__Actinomycetia; o__Corynebacteriales; f__Mycobacteriaceae; g__Mycobacterium; s__Mycobacterium lacus	d__Bacteria; p__Actinomycetota; c__Actinomycetia; o__Mycobacteriales; f__Mycobacteriaceae; g__Mycobacterium; s__Mycobacterium lacus	TRUE	TRUE
GCF_010731575.1	Mycolicibacterium monacense	d__Bacteria; p__Actinobacteria; c__Actinomycetia; o__Corynebacteriales; f__Mycobacteriaceae; g__Mycolicibacterium; s__Mycolicibacterium monacense	d__Bacteria; p__Actinomycetota; c__Actinomycetia; o__Mycobacteriales; f__Mycobacteriaceae; g__Mycobacterium; s__Mycobacterium monacense	TRUE	TRUE
GCF_010731595.1	Mycobacterium seoulense	d__Bacteria; p__Actinobacteria; c__Actinomycetia; o__Corynebacteriales; f__Mycobacteriaceae; g__Mycobacterium; s__Mycobacterium seoulense	d__Bacteria; p__Actinomycetota; c__Actinomycetia; o__Mycobacteriales; f__Mycobacteriaceae; g__Mycobacterium; s__Mycobacterium seoulense	TRUE	TRUE
GCF_010731615.1	Mycolicibacterium insubricum	d__Bacteria; p__Actinobacteria; c__Actinomycetia; o__Corynebacteriales; f__Mycobacteriaceae; g__Mycolicibacterium; s__Mycolicibacterium insubricum	d__Bacteria; p__Actinomycetota; c__Actinomycetia; o__Mycobacteriales; f__Mycobacteriaceae; g__Mycobacterium; s__Mycobacterium insubricum	TRUE	TRUE
GCF_010731635.1	Mycobacterium noviomagense	d__Bacteria; p__Actinobacteria; c__Actinomycetia; o__Corynebacteriales; f__Mycobacteriaceae; g__Mycobacterium; s__Mycobacterium noviomagense	d__Bacteria; p__Actinomycetota; c__Actinomycetia; o__Mycobacteriales; f__Mycobacteriaceae; g__Mycobacterium; s__Mycobacterium noviomagense	TRUE	TRUE
GCF_010731655.1	Mycobacterium paraseoulense	d__Bacteria; p__Actinobacteria; c__Actinomycetia; o__Corynebacteriales; f__Mycobacteriaceae; g__Mycobacterium; s__Mycobacterium paraseoulense	d__Bacteria; p__Actinomycetota; c__Actinomycetia; o__Mycobacteriales; f__Mycobacteriaceae; g__Mycobacterium; s__Mycobacterium paraseoulense	TRUE	TRUE
GCF_010731675.1	Mycobacterium marseillense	d__Bacteria; p__Actinobacteria; c__Actinomycetia; o__Corynebacteriales; f__Mycobacteriaceae; g__Mycobacterium; s__Mycobacterium marseillense	d__Bacteria; p__Actinomycetota; c__Actinomycetia; o__Mycobacteriales; f__Mycobacteriaceae; g__Mycobacterium; s__Mycobacterium marseillense	TRUE	TRUE
GCF_010731695.1	Mycolicibacterium litorale	d__Bacteria; p__Actinobacteria; c__Actinomycetia; o__Corynebacteriales; f__Mycobacteriaceae; g__Mycolicibacterium; s__Mycolicibacterium litorale	d__Bacteria; p__Actinomycetota; c__Actinomycetia; o__Mycobacteriales; f__Mycobacteriaceae; g__Mycobacterium; s__Mycobacterium litorale	TRUE	TRUE
GCF_010731715.1	Mycobacterium stomatepiae	d__Bacteria; p__Actinobacteria; c__Actinomycetia; o__Corynebacteriales; f__Mycobacteriaceae; g__Mycobacterium; s__Mycobacterium stomatepiae	d__Bacteria; p__Actinomycetota; c__Actinomycetia; o__Mycobacteriales; f__Mycobacteriaceae; g__Mycobacterium; s__Mycobacterium stomatepiae	TRUE	TRUE
GCF_010731755.1	Mycolicibacter minnesotensis	d__Bacteria; p__Actinobacteria; c__Actinomycetia; o__Corynebacteriales; f__Mycobacteriaceae; g__Mycolicibacter; s__Mycolicibacter minnesotensis	d__Bacteria; p__Actinomycetota; c__Actinomycetia; o__Mycobacteriales; f__Mycobacteriaceae; g__Mycobacterium; s__Mycobacterium minnesotense	TRUE	TRUE
GCF_010731775.1	Mycobacterium mantenii	d__Bacteria; p__Actinobacteria; c__Actinomycetia; o__Corynebacteriales; f__Mycobacteriaceae; g__Mycobacterium; s__Mycobacterium mantenii	d__Bacteria; p__Actinomycetota; c__Actinomycetia; o__Mycobacteriales; f__Mycobacteriaceae; g__Mycobacterium; s__Mycobacterium mantenii	TRUE	TRUE
GCF_010731795.1	Mycolicibacterium celeriflavum	d__Bacteria; p__Actinobacteria; c__Actinomycetia; o__Corynebacteriales; f__Mycobacteriaceae; g__Mycolicibacterium; s__Mycolicibacterium celeriflavum	d__Bacteria; p__Actinomycetota; c__Actinomycetia; o__Mycobacteriales; f__Mycobacteriaceae; g__Mycobacterium; s__Mycobacterium celeriflavum	TRUE	TRUE
GCF_010731815.2	Mycolicibacterium arabiense	d__Bacteria; p__Actinobacteria; c__Actinomycetia; o__Corynebacteriales; f__Mycobacteriaceae; g__Mycolicibacterium; s__Mycolicibacterium arabiense	d__Bacteria; p__Actinomycetota; c__Actinomycetia; o__Mycobacteriales; f__Mycobacteriaceae; g__Mycobacterium; s__Mycobacterium arabiense	TRUE	TRUE
GCF_010731855.1	Mycolicibacterium anyangense	d__Bacteria; p__Actinobacteria; c__Actinomycetia; o__Corynebacteriales; f__Mycobacteriaceae; g__Mycolicibacterium; s__Mycolicibacterium anyangense	d__Bacteria; p__Actinomycetota; c__Actinomycetia; o__Mycobacteriales; f__Mycobacteriaceae; g__Mycobacterium; s__Mycobacterium anyangense	TRUE	TRUE
GCF_010731875.1	Mycolicibacterium sarraceniae	d__Bacteria; p__Actinobacteria; c__Actinomycetia; o__Corynebacteriales; f__Mycobacteriaceae; g__Mycolicibacterium; s__Mycolicibacterium sarraceniae	d__Bacteria; p__Actinomycetota; c__Actinomycetia; o__Mycobacteriales; f__Mycobacteriaceae; g__Mycobacterium; s__Mycobacterium sarraceniae	TRUE	TRUE
GCF_010731895.1	Mycolicibacterium helvum	d__Bacteria; p__Actinobacteria; c__Actinomycetia; o__Corynebacteriales; f__Mycobacteriaceae; g__Mycolicibacterium; s__Mycolicibacterium helvum	d__Bacteria; p__Actinomycetota; c__Actinomycetia; o__Mycobacteriales; f__Mycobacteriaceae; g__Mycobacterium; s__Mycobacterium helvum	TRUE	TRUE
GCF_010731935.1	Mycobacterium paraintracellulare	d__Bacteria; p__Actinobacteria; c__Actinomycetia; o__Corynebacteriales; f__Mycobacteriaceae; g__Mycobacterium; s__Mycobacterium paraintracellulare	d__Bacteria; p__Actinomycetota; c__Actinomycetia; o__Mycobacteriales; f__Mycobacteriaceae; g__Mycobacterium; s__Mycobacterium intracellulare	FALSE	TRUE
GCF_011758805.1	Mycolicibacterium fluoranthenivorans	d__Bacteria; p__Actinobacteria; c__Actinomycetia; o__Corynebacteriales; f__Mycobacteriaceae; g__Mycolicibacterium; s__Mycolicibacterium fluoranthenivorans	d__Bacteria; p__Actinomycetota; c__Actinomycetia; o__Mycobacteriales; f__Mycobacteriaceae; g__Mycobacterium; s__Mycobacterium fluoranthenivorans	TRUE	TRUE
GCF_012396425.1	Mycolicibacterium septicum DSM 44393	d__Bacteria; p__Actinobacteria; c__Actinomycetia; o__Corynebacteriales; f__Mycobacteriaceae; g__Mycolicibacterium; s__Mycolicibacterium septicum	d__Bacteria; p__Actinomycetota; c__Actinomycetia; o__Mycobacteriales; f__Mycobacteriaceae; g__Mycobacterium; s__Mycobacterium septicum	FALSE	TRUE
GCF_013404075.1	Mycolicibacterium vinylchloridicum	d__Bacteria; p__Actinobacteria; c__Actinomycetia; o__Corynebacteriales; f__Mycobacteriaceae; g__Mycolicibacterium; s__Mycolicibacterium vinylchloridicum	d__Bacteria; p__Actinomycetota; c__Actinomycetia; o__Mycobacteriales; f__Mycobacteriaceae; g__Mycobacterium; s__Mycobacterium vinylchloridicum	TRUE	TRUE
GCF_013466425.1	Mycobacterium vicinigordonae	d__Bacteria; p__Actinobacteria; c__Actinomycetia; o__Corynebacteriales; f__Mycobacteriaceae; g__Mycobacterium; s__Mycobacterium vicinigordonae	d__Bacteria; p__Actinomycetota; c__Actinomycetia; o__Mycobacteriales; f__Mycobacteriaceae; g__Mycobacterium; s__Mycobacterium vicinigordonae	TRUE	TRUE
GCF_014893035.1	Mycolicibacterium baixiangningiae	d__Bacteria; p__Actinobacteria; c__Actinomycetia; o__Corynebacteriales; f__Mycobacteriaceae; g__Mycolicibacterium; s__Mycolicibacterium baixiangningiae	d__Bacteria; p__Actinomycetota; c__Actinomycetia; o__Mycobacteriales; f__Mycobacteriaceae; g__Mycobacterium; s__Mycobacterium baixiangningiae	FALSE	TRUE
GCF_015689175.1	Mycobacterium kubicae	d__Bacteria; p__Actinobacteria; c__Actinomycetia; o__Corynebacteriales; f__Mycobacteriaceae; g__Mycobacterium; s__Mycobacterium kubicae	d__Bacteria; p__Actinomycetota; c__Actinomycetia; o__Mycobacteriales; f__Mycobacteriaceae; g__Mycobacterium; s__Mycobacterium kubicae	TRUE	TRUE
GCF_015710575.1	Mycolicibacterium mengxianglii	d__Bacteria; p__Actinobacteria; c__Actinomycetia; o__Corynebacteriales; f__Mycobacteriaceae; g__Mycolicibacterium; s__Mycolicibacterium mengxianglii	d__Bacteria; p__Actinomycetota; c__Actinomycetia; o__Mycobacteriales; f__Mycobacteriaceae; g__Mycobacterium; s__Mycobacterium mengxianglii	TRUE	TRUE
GCF_016313185.1	Mycolicibacterium baixiangningiae	d__Bacteria; p__Actinobacteria; c__Actinomycetia; o__Corynebacteriales; f__Mycobacteriaceae; g__Mycolicibacterium; s__Mycolicibacterium baixiangningiae	d__Bacteria; p__Actinomycetota; c__Actinomycetia; o__Mycobacteriales; f__Mycobacteriaceae; g__Mycobacterium; s__Mycobacterium baixiangningiae	TRUE	TRUE
GCF_016592155.1	Mycobacterium heckeshornense	d__Bacteria; p__Actinobacteria; c__Actinomycetia; o__Corynebacteriales; f__Mycobacteriaceae; g__Mycobacterium; s__Mycobacterium heckeshornense	d__Bacteria; p__Actinomycetota; c__Actinomycetia; o__Mycobacteriales; f__Mycobacteriaceae; g__Mycobacterium; s__Mycobacterium heckeshornense	TRUE	TRUE
GCF_017876775.1	Mycolicibacterium lutetiense	d__Bacteria; p__Actinobacteria; c__Actinomycetia; o__Corynebacteriales; f__Mycobacteriaceae; g__Mycolicibacterium; s__Mycolicibacterium lutetiense	d__Bacteria; p__Actinomycetota; c__Actinomycetia; o__Mycobacteriales; f__Mycobacteriaceae; g__Mycobacterium; s__Mycobacterium lutetiense	TRUE	TRUE
GCF_018278905.1	Mycobacterium spongiae	d__Bacteria; p__Actinobacteria; c__Actinomycetia; o__Corynebacteriales; f__Mycobacteriaceae; g__Mycobacterium; s__Mycobacterium spongiae	d__Bacteria; p__Actinomycetota; c__Actinomycetia; o__Mycobacteriales; f__Mycobacteriaceae; g__Mycobacterium; s__Mycobacterium spongiae	TRUE	TRUE
GCF_018455725.1	Mycolicibacter acidiphilus	d__Bacteria; p__Actinobacteria; c__Actinomycetia; o__Corynebacteriales; f__Mycobacteriaceae; g__Mycolicibacterium; s__Mycolicibacter acidiphilus	d__Bacteria; p__Actinomycetota; c__Actinomycetia; o__Mycobacteriales; f__Mycobacteriaceae; g__Mycobacterium; s__Mycobacterium acidiphilus	TRUE	TRUE
GCF_019050325.1	[Mycobacterium] fortunisiensis	d__Bacteria; p__Actinobacteria; c__Actinomycetia; o__Corynebacteriales; f__Mycobacteriaceae; g__Mycolicibacterium; s__[Mycobacterium] fortunisiensis	d__Bacteria; p__Actinomycetota; c__Actinomycetia; o__Mycobacteriales; f__Mycobacteriaceae; g__Mycobacterium; s__Mycobacterium fortunisiensis	TRUE	TRUE
GCF_019456655.1	Mycobacterium diernhoferi	d__Bacteria; p__Actinobacteria; c__Actinomycetia; o__Corynebacteriales; f__Mycobacteriaceae; g__Mycobacterium; s__Mycobacterium diernhoferi	d__Bacteria; p__Actinomycetota; c__Actinomycetia; o__Mycobacteriales; f__Mycobacteriaceae; g__Mycobacterium; s__Mycobacterium diernhoferi	TRUE	TRUE
GCF_019456675.1	Mycobacterium pallens	d__Bacteria; p__Actinobacteria; c__Actinomycetia; o__Corynebacteriales; f__Mycobacteriaceae; g__Mycobacterium; s__Mycobacterium pallens	d__Bacteria; p__Actinomycetota; c__Actinomycetia; o__Mycobacteriales; f__Mycobacteriaceae; g__Mycobacterium; s__Mycobacterium crocinum	FALSE	TRUE
GCF_019456695.2	Mycobacterium shottsii	d__Bacteria; p__Actinobacteria; c__Actinomycetia; o__Corynebacteriales; f__Mycobacteriaceae; g__Mycobacterium; s__Mycobacterium shottsii	d__Bacteria; p__Actinomycetota; c__Actinomycetia; o__Mycobacteriales; f__Mycobacteriaceae; g__Mycobacterium; s__Mycobacterium marinum	FALSE	TRUE
GCF_019645835.1	Mycobacterium holsaticum	d__Bacteria; p__Actinobacteria; c__Actinomycetia; o__Corynebacteriales; f__Mycobacteriaceae; g__Mycobacterium; s__Mycobacterium holsaticum	d__Bacteria; p__Actinomycetota; c__Actinomycetia; o__Mycobacteriales; f__Mycobacteriaceae; g__Mycobacterium; s__Mycobacterium holsaticum	TRUE	TRUE
GCF_019645855.1	Mycobacterium malmoense	d__Bacteria; p__Actinobacteria; c__Actinomycetia; o__Corynebacteriales; f__Mycobacteriaceae; g__Mycobacterium; s__Mycobacterium malmoense	d__Bacteria; p__Actinomycetota; c__Actinomycetia; o__Mycobacteriales; f__Mycobacteriaceae; g__Mycobacterium; s__Mycobacterium malmoense	TRUE	TRUE
GCF_019645875.1	Mycobacterium senegalense	d__Bacteria; p__Actinobacteria; c__Actinomycetia; o__Corynebacteriales; f__Mycobacteriaceae; g__Mycobacterium; s__Mycobacterium senegalense	d__Bacteria; p__Actinomycetota; c__Actinomycetia; o__Mycobacteriales; f__Mycobacteriaceae; g__Mycobacterium; s__Mycobacterium senegalense	TRUE	TRUE
GCF_019668465.1	Mycobacterium senriense	d__Bacteria; p__Actinobacteria; c__Actinomycetia; o__Corynebacteriales; f__Mycobacteriaceae; g__Mycobacterium; s__Mycobacterium senriense	d__Bacteria; p__Actinomycetota; c__Actinomycetia; o__Mycobacteriales; f__Mycobacteriaceae; g__Mycobacterium; s__Mycobacterium senriense	TRUE	TRUE
GCF_021916785.1	Mycolicibacterium lacusdiani	d__Bacteria; p__Actinobacteria; c__Actinomycetia; o__Corynebacteriales; f__Mycobacteriaceae; g__Mycolicibacterium; s__Mycolicibacterium lacusdiani	d__Bacteria; p__Actinomycetota; c__Actinomycetia; o__Mycobacteriales; f__Mycobacteriaceae; g__Mycobacterium; s__Mycobacterium lacusdiani	TRUE	TRUE
GCF_022179545.1	Mycolicibacterium fortuitum subsp. fortuitum	d__Bacteria; p__Actinobacteria; c__Actinomycetia; o__Corynebacteriales; f__Mycobacteriaceae; g__Mycolicibacterium; s__Mycolicibacterium fortuitum	d__Bacteria; p__Actinomycetota; c__Actinomycetia; o__Mycobacteriales; f__Mycobacteriaceae; g__Mycobacterium; s__Mycobacterium fortuitum	TRUE	TRUE
GCF_022370635.1	Mycobacterium crocinum	d__Bacteria; p__Actinobacteria; c__Actinomycetia; o__Corynebacteriales; f__Mycobacteriaceae; g__Mycobacterium; s__Mycobacterium crocinum	d__Bacteria; p__Actinomycetota; c__Actinomycetia; o__Mycobacteriales; f__Mycobacteriaceae; g__Mycobacterium; s__Mycobacterium crocinum	TRUE	TRUE
GCF_022370755.2	Mycobacterium goodii	d__Bacteria; p__Actinobacteria; c__Actinomycetia; o__Corynebacteriales; f__Mycobacteriaceae; g__Mycobacterium; s__Mycobacterium goodii	d__Bacteria; p__Actinomycetota; c__Actinomycetia; o__Mycobacteriales; f__Mycobacteriaceae; g__Mycobacterium; s__Mycobacterium goodii	TRUE	TRUE
GCF_022370835.1	Mycolicibacillus parakoreensis	d__Bacteria; p__Actinobacteria; c__Actinomycetia; o__Corynebacteriales; f__Mycobacteriaceae; g__Mycolicibacillus; s__Mycolicibacillus parakoreensis	d__Bacteria; p__Actinomycetota; c__Actinomycetia; o__Mycobacteriales; f__Mycobacteriaceae; g__Mycobacterium; s__Mycobacterium parakoreense	TRUE	TRUE
GCF_022374875.1	Mycobacterium rufum	d__Bacteria; p__Actinobacteria; c__Actinomycetia; o__Corynebacteriales; f__Mycobacteriaceae; g__Mycobacterium; s__Mycobacterium rufum	d__Bacteria; p__Actinomycetota; c__Actinomycetia; o__Mycobacteriales; f__Mycobacteriaceae; g__Mycobacterium; s__Mycobacterium rufum	TRUE	TRUE
GCF_022374895.2	Mycobacterium lentiflavum	d__Bacteria; p__Actinobacteria; c__Actinomycetia; o__Corynebacteriales; f__Mycobacteriaceae; g__Mycobacterium; s__Mycobacterium lentiflavum	d__Bacteria; p__Actinomycetota; c__Actinomycetia; o__Mycobacteriales; f__Mycobacteriaceae; g__Mycobacterium; s__Mycobacterium lentiflavum	TRUE	TRUE
GCF_022374915.1	Mycobacterium ulcerans	d__Bacteria; p__Actinobacteria; c__Actinomycetia; o__Corynebacteriales; f__Mycobacteriaceae; g__Mycobacterium; s__Mycobacterium ulcerans	d__Bacteria; p__Actinomycetota; c__Actinomycetia; o__Mycobacteriales; f__Mycobacteriaceae; g__Mycobacterium; s__Mycobacterium marinum	FALSE	TRUE
GCF_022374935.2	Mycobacterium virginiense	d__Bacteria; p__Actinobacteria; c__Actinomycetia; o__Corynebacteriales; f__Mycobacteriaceae; g__Mycobacterium; s__Mycobacterium virginiense	d__Bacteria; p__Actinomycetota; c__Actinomycetia; o__Mycobacteriales; f__Mycobacteriaceae; g__Mycobacterium; s__Mycobacterium virginiense	TRUE	TRUE
GCF_022430545.1	Mycobacterium paraterrae	d__Bacteria; p__Actinobacteria; c__Actinomycetia; o__Corynebacteriales; f__Mycobacteriaceae; g__Mycobacterium; s__Mycobacterium paraterrae	d__Bacteria; p__Actinomycetota; c__Actinomycetia; o__Mycobacteriales; f__Mycobacteriaceae; g__Mycobacterium; s__Mycobacterium paraterrae	TRUE	TRUE
GCF_022760805.1	Candidatus Mycolicibacterium alkanivorans	d__Bacteria; p__Actinobacteria; c__Actinomycetia; o__Corynebacteriales; f__Mycobacteriaceae; g__Mycolicibacterium; s__Candidatus Mycolicibacterium alkanivorans	d__Bacteria; p__Actinomycetota; c__Actinomycetia; o__Mycobacteriales; f__Mycobacteriaceae; g__Mycobacterium; s__Mycobacterium alkanivorans	TRUE	TRUE
GCF_023278525.1	Mycobacterium intracellulare ATCC 13950	d__Bacteria; p__Actinobacteria; c__Actinomycetia; o__Corynebacteriales; f__Mycobacteriaceae; g__Mycobacterium; s__Mycobacterium intracellulare	d__Bacteria; p__Actinomycetota; c__Actinomycetia; o__Mycobacteriales; f__Mycobacteriaceae; g__Mycobacterium; s__Mycobacterium intracellulare	FALSE	TRUE
GCF_900078665.2	Mycolicibacterium houstonense	d__Bacteria; p__Actinobacteria; c__Actinomycetia; o__Corynebacteriales; f__Mycobacteriaceae; g__Mycolicibacterium; s__Mycolicibacterium houstonense	d__Bacteria; p__Actinomycetota; c__Actinomycetia; o__Mycobacteriales; f__Mycobacteriaceae; g__Mycobacterium; s__Mycobacterium houstonense	TRUE	TRUE
GCF_900078675.2	Mycobacterium interjectum	d__Bacteria; p__Actinobacteria; c__Actinomycetia; o__Corynebacteriales; f__Mycobacteriaceae; g__Mycobacterium; s__Mycobacterium interjectum	d__Bacteria; p__Actinomycetota; c__Actinomycetia; o__Mycobacteriales; f__Mycobacteriaceae; g__Mycobacterium; s__Mycobacterium interjectum	TRUE	TRUE
GCF_900078685.2	Mycolicibacter icosiumassiliensis	d__Bacteria; p__Actinobacteria; c__Actinomycetia; o__Corynebacteriales; f__Mycobacteriaceae; g__Mycolicibacter; s__Mycolicibacter icosiumassiliensis	d__Bacteria; p__Actinomycetota; c__Actinomycetia; o__Mycobacteriales; f__Mycobacteriaceae; g__Mycobacterium; s__Mycobacterium icosiumassiliensis	TRUE	TRUE
GCF_900108565.1	Mycolicibacterium rutilum	d__Bacteria; p__Actinobacteria; c__Actinomycetia; o__Corynebacteriales; f__Mycobacteriaceae; g__Mycolicibacterium; s__Mycolicibacterium rutilum	d__Bacteria; p__Actinomycetota; c__Actinomycetia; o__Mycobacteriales; f__Mycobacteriaceae; g__Mycobacterium; s__Mycobacterium rutilum	TRUE	TRUE
GCF_900157365.1	Mycobacterium numidiamassiliense	d__Bacteria; p__Actinobacteria; c__Actinomycetia; o__Corynebacteriales; f__Mycobacteriaceae; g__Mycobacterium; s__Mycobacterium numidiamassiliense	d__Bacteria; p__Actinomycetota; c__Actinomycetia; o__Mycobacteriales; f__Mycobacteriaceae; g__Mycobacterium; s__Mycobacterium numidiamassiliense	TRUE	TRUE
GCF_900157375.1	Mycobacterium rhizamassiliense	d__Bacteria; p__Actinobacteria; c__Actinomycetia; o__Corynebacteriales; f__Mycobacteriaceae; g__Mycobacterium; s__Mycobacterium rhizamassiliense	d__Bacteria; p__Actinomycetota; c__Actinomycetia; o__Mycobacteriales; f__Mycobacteriaceae; g__Mycobacterium; s__Mycobacterium rhizamassiliense	TRUE	TRUE
GCF_900157385.1	Mycobacterium terramassiliense	d__Bacteria; p__Actinobacteria; c__Actinomycetia; o__Corynebacteriales; f__Mycobacteriaceae; g__Mycobacterium; s__Mycobacterium terramassiliense	d__Bacteria; p__Actinomycetota; c__Actinomycetia; o__Mycobacteriales; f__Mycobacteriaceae; g__Mycobacterium; s__Mycobacterium terramassiliense	TRUE	TRUE
GCF_900176255.2	Mycobacterium ahvazicum	d__Bacteria; p__Actinobacteria; c__Actinomycetia; o__Corynebacteriales; f__Mycobacteriaceae; g__Mycobacterium; s__Mycobacterium ahvazicum	d__Bacteria; p__Actinomycetota; c__Actinomycetia; o__Mycobacteriales; f__Mycobacteriaceae; g__Mycobacterium; s__Mycobacterium ahvazicum	TRUE	TRUE
GCF_900187065.1	Mycolicibacterium thermoresistibile	d__Bacteria; p__Actinobacteria; c__Actinomycetia; o__Corynebacteriales; f__Mycobacteriaceae; g__Mycolicibacterium; s__Mycolicibacterium thermoresistibile	d__Bacteria; p__Actinomycetota; c__Actinomycetia; o__Mycobacteriales; f__Mycobacteriaceae; g__Mycobacterium; s__Mycobacterium thermoresistibile	TRUE	TRUE
GCF_900232995.1	Mycobacterium simulans	d__Bacteria; p__Actinobacteria; c__Actinomycetia; o__Corynebacteriales; f__Mycobacteriaceae; g__Mycobacterium; s__Mycobacterium simulans	d__Bacteria; p__Actinomycetota; c__Actinomycetia; o__Mycobacteriales; f__Mycobacteriaceae; g__Mycobacterium; s__Mycobacterium simulans	TRUE	TRUE
GCF_900292015.1	Mycobacterium basiliense	d__Bacteria; p__Actinobacteria; c__Actinomycetia; o__Corynebacteriales; f__Mycobacteriaceae; g__Mycobacterium; s__Mycobacterium basiliense	d__Bacteria; p__Actinomycetota; c__Actinomycetia; o__Mycobacteriales; f__Mycobacteriaceae; g__Mycobacterium; s__Mycobacterium basiliense	TRUE	TRUE
GCF_900453085.1	Mycolicibacterium aichiense	d__Bacteria; p__Actinobacteria; c__Actinomycetia; o__Corynebacteriales; f__Mycobacteriaceae; g__Mycolicibacterium; s__Mycolicibacterium aichiense	d__Bacteria; p__Actinomycetota; c__Actinomycetia; o__Mycobacteriales; f__Mycobacteriaceae; g__Mycobacterium; s__Mycobacterium aichiense	FALSE	TRUE
GCF_900453225.1	Mycobacteroides abscessus	d__Bacteria; p__Actinobacteria; c__Actinomycetia; o__Corynebacteriales; f__Mycobacteriaceae; g__Mycobacteroides; s__Mycobacteroides abscessus	d__Bacteria; p__Actinomycetota; c__Actinomycetia; o__Mycobacteriales; f__Mycobacteriaceae; g__Mycobacterium; s__Mycobacterium abscessus	FALSE	TRUE
GCF_900453365.1	Mycolicibacterium tokaiense	d__Bacteria; p__Actinobacteria; c__Actinomycetia; o__Corynebacteriales; f__Mycobacteriaceae; g__Mycolicibacterium; s__Mycolicibacterium tokaiense	d__Bacteria; p__Actinomycetota; c__Actinomycetia; o__Mycobacteriales; f__Mycobacteriaceae; g__Mycobacterium; s__Mycobacterium tokaiense	FALSE	TRUE
GCF_900453395.1	Mycobacterium xenopi	d__Bacteria; p__Actinobacteria; c__Actinomycetia; o__Corynebacteriales; f__Mycobacteriaceae; g__Mycobacterium; s__Mycobacterium xenopi	d__Bacteria; p__Actinomycetota; c__Actinomycetia; o__Mycobacteriales; f__Mycobacteriaceae; g__Mycobacterium; s__Mycobacterium xenopi	FALSE	TRUE
GCF_900453455.1	Mycolicibacterium chubuense	d__Bacteria; p__Actinobacteria; c__Actinomycetia; o__Corynebacteriales; f__Mycobacteriaceae; g__Mycolicibacterium; s__Mycolicibacterium chubuense	d__Bacteria; p__Actinomycetota; c__Actinomycetia; o__Mycobacteriales; f__Mycobacteriaceae; g__Mycobacterium; s__Mycobacterium chubuense	FALSE	TRUE
GCF_900454025.1	Mycolicibacterium gilvum	d__Bacteria; p__Actinobacteria; c__Actinomycetia; o__Corynebacteriales; f__Mycobacteriaceae; g__Mycolicibacterium; s__Mycolicibacterium gilvum	d__Bacteria; p__Actinomycetota; c__Actinomycetia; o__Mycobacteriales; f__Mycobacteriaceae; g__Mycobacterium; s__Mycobacterium gilvum	TRUE	TRUE
GCF_900566055.1	Mycobacterium innocens	d__Bacteria; p__Actinobacteria; c__Actinomycetia; o__Corynebacteriales; f__Mycobacteriaceae; g__Mycobacterium; s__Mycobacterium innocens	d__Bacteria; p__Actinomycetota; c__Actinomycetia; o__Mycobacteriales; f__Mycobacteriaceae; g__Mycobacterium; s__Mycobacterium innocens	TRUE	TRUE
GCF_900566075.1	Mycobacterium pseudokansasii	d__Bacteria; p__Actinobacteria; c__Actinomycetia; o__Corynebacteriales; f__Mycobacteriaceae; g__Mycobacterium; s__Mycobacterium pseudokansasii	d__Bacteria; p__Actinomycetota; c__Actinomycetia; o__Mycobacteriales; f__Mycobacteriaceae; g__Mycobacterium; s__Mycobacterium pseudokansasii	TRUE	TRUE
GCF_900566085.1	Mycobacterium attenuatum	d__Bacteria; p__Actinobacteria; c__Actinomycetia; o__Corynebacteriales; f__Mycobacteriaceae; g__Mycobacterium; s__Mycobacterium attenuatum	d__Bacteria; p__Actinomycetota; c__Actinomycetia; o__Mycobacteriales; f__Mycobacteriaceae; g__Mycobacterium; s__Mycobacterium attenuatum	TRUE	TRUE
GCF_900637195.1	Mycolicibacterium aurum	d__Bacteria; p__Actinobacteria; c__Actinomycetia; o__Corynebacteriales; f__Mycobacteriaceae; g__Mycolicibacterium; s__Mycolicibacterium aurum	d__Bacteria; p__Actinomycetota; c__Actinomycetia; o__Mycobacteriales; f__Mycobacteriaceae; g__Mycobacterium; s__Mycobacterium aurum	TRUE	TRUE
GCF_900637205.1	Mycolicibacterium chitae	d__Bacteria; p__Actinobacteria; c__Actinomycetia; o__Corynebacteriales; f__Mycobacteriaceae; g__Mycolicibacterium; s__Mycolicibacterium chitae	d__Bacteria; p__Actinomycetota; c__Actinomycetia; o__Mycobacteriales; f__Mycobacteriaceae; g__Mycobacterium; s__Mycobacterium chitae	TRUE	TRUE

## Sheet: Online Resource 2
Online Resource 2. Presence/absence patterns of metabolic pathways in M. meyganense and M. stellerae, its closest relative species. GapSeq was used to determine the presence of metabolic pathways. Pathways present in at least one of the species are shown here with the presence/absence patterns where TRUE means present and FALSE means absent.
Name	M. meyganense	M. stellerae
2-methylcitrate cycle II	TRUE	FALSE
dimethyl sulfide biosynthesis from methionine	TRUE	FALSE
glyphosate degradation II	TRUE	FALSE
L-cysteine biosynthesis IX (Trichomonas vaginalis)	TRUE	FALSE
methylamine degradation II	TRUE	FALSE
NAD salvage pathway II (PNC IV cycle)	TRUE	FALSE
pyridoxal 5'-phosphate biosynthesis II	TRUE	FALSE
thiazole component of thiamine diphosphate biosynthesis II	TRUE	FALSE
UDP-N-acetylmuramoyl-pentapeptide biosynthesis II (lysine-containing)	TRUE	FALSE
(R,R)-butanediol biosynthesis	FALSE	TRUE
(R,R)-butanediol degradation	FALSE	TRUE
&gamma;-resorcylate degradation I	FALSE	TRUE
&gamma;-resorcylate degradation II	FALSE	TRUE
1-chloro-2-nitrobenzene degradation	FALSE	TRUE
1,2-propanediol biosynthesis from lactate (engineered)	FALSE	TRUE
1,2,4,5-tetrachlorobenzene degradation	FALSE	TRUE
10,13-epoxy-11-methyl-octadecadienoate biosynthesis	FALSE	TRUE
2-methylcitrate cycle I	FALSE	TRUE
3-oxoadipate degradation	FALSE	TRUE
3-phenylpropanoate and 3-(3-hydroxyphenyl)propanoate degradation to 2-hydroxypentadienoate	FALSE	TRUE
4-amino-2-methyl-5-diphosphomethylpyrimidine biosynthesis I	FALSE	TRUE
4-hydroxymandelate degradation	FALSE	TRUE
5-hydroxybenzimidazole biosynthesis (anaerobic)	FALSE	TRUE
acetate and ATP formation from acetyl-CoA II	FALSE	TRUE
adenosine nucleotides degradation II	FALSE	TRUE
Agmatine Transport	FALSE	TRUE
allantoin degradation to ureidoglycolate I (urea producing)	FALSE	TRUE
anthranilate degradation II (aerobic)	FALSE	TRUE
ascorbate recycling (cytosolic)	FALSE	TRUE
Calvin-Benson-Bassham cycle	FALSE	TRUE
cinnamate and 3-hydroxycinnamate degradation to 2-hydroxypentadienoate	FALSE	TRUE
cyanide degradation	FALSE	TRUE
D-galactarate degradation II	FALSE	TRUE
D-galactose degradation I (Leloir pathway)	FALSE	TRUE
D-galactose detoxification	FALSE	TRUE
D-glucarate degradation II	FALSE	TRUE
D-threitol degradation	FALSE	TRUE
D-xylose degradation I	FALSE	TRUE
dimycocerosyl phthiocerol biosynthesis	FALSE	TRUE
diphenylamine degradation	FALSE	TRUE
dTDP-4-O-demethyl-&beta;-L-noviose biosynthesis	FALSE	TRUE
erythritol degradation II	FALSE	TRUE
formate oxidation to CO2	FALSE	TRUE
gluconeogenesis I	FALSE	TRUE
glycolate and glyoxylate degradation I	FALSE	TRUE
guanosine nucleotides degradation I	FALSE	TRUE
guanosine nucleotides degradation II	FALSE	TRUE
guanosine nucleotides degradation III	FALSE	TRUE
hydrogen oxidation I (aerobic)	FALSE	TRUE
hydrogen production I	FALSE	TRUE
indigo biosynthesis	FALSE	TRUE
inosine 5'-phosphate degradation	FALSE	TRUE
isopropylamine degradation	FALSE	TRUE
L-arabinose degradation II	FALSE	TRUE
L-arginine degradation XII	FALSE	TRUE
L-citrulline degradation	FALSE	TRUE
L-histidine degradation II	FALSE	TRUE
L-histidine degradation VI	FALSE	TRUE
L-methionine salvage from L-homocysteine	FALSE	TRUE
linuron degradation	FALSE	TRUE
mandelate degradation I	FALSE	TRUE
melibiose degradation	FALSE	TRUE
methane oxidation to methanol I	FALSE	TRUE
neurosporene biosynthesis	FALSE	TRUE
nitrate reduction II (assimilatory)	FALSE	TRUE
nitrobenzene degradation II	FALSE	TRUE
oleate biosynthesis II (animals and fungi)	FALSE	TRUE
oxalate degradation II	FALSE	TRUE
oxalate degradation III	FALSE	TRUE
phthalate degradation (aerobic)	FALSE	TRUE
polymyxin A biosynthesis	FALSE	TRUE
propane degradation II	FALSE	TRUE
purine nucleobases degradation II (anaerobic)	FALSE	TRUE
resorcinol degradation	FALSE	TRUE
Rubisco shunt	FALSE	TRUE
S-methyl-5'-thioadenosine degradation IV	FALSE	TRUE
shikimate degradation II	FALSE	TRUE
sophorosyloxydocosanoate deacetylation	FALSE	TRUE
sulfide oxidation I (to sulfur globules)	FALSE	TRUE
sulfoacetaldehyde degradation II	FALSE	TRUE
sulfur reduction I	FALSE	TRUE
sulfur reduction II (via polysulfide)	FALSE	TRUE
tetracycline resistance	FALSE	TRUE
vanchrobactin biosynthesis	FALSE	TRUE
yersiniabactin biosynthesis	FALSE	TRUE
(S)-lactate fermentation to propanoate	TRUE	TRUE
&beta;-alanine biosynthesis I	TRUE	TRUE
&beta;-alanine biosynthesis II	TRUE	TRUE
&beta;-alanine biosynthesis III	TRUE	TRUE
&beta;-alanine biosynthesis IV	TRUE	TRUE
&beta;-alanine degradation I	TRUE	TRUE
&beta;-alanine degradation II	TRUE	TRUE
2-carboxy-1,4-naphthoquinol biosynthesis	TRUE	TRUE
2-hydroxypenta-2,4-dienoate degradation	TRUE	TRUE
2-methyl-branched fatty acid &beta;-oxidation	TRUE	TRUE
2-oxoglutarate decarboxylation to succinyl-CoA	TRUE	TRUE
2-oxoisovalerate decarboxylation to isobutanoyl-CoA	TRUE	TRUE
3-(4-hydroxyphenyl)pyruvate biosynthesis	TRUE	TRUE
3-dehydroquinate biosynthesis I	TRUE	TRUE
3-hydroxybutyryl-CoA dehydrogenase	TRUE	TRUE
3-methylbutanol biosynthesis (engineered)	TRUE	TRUE
4-aminobenzoate biosynthesis	TRUE	TRUE
4-aminobutanoate degradation I	TRUE	TRUE
4-aminobutanoate degradation II	TRUE	TRUE
4-aminobutanoate degradation III	TRUE	TRUE
5-aminoimidazole ribonucleotide biosynthesis I	TRUE	TRUE
5-aminoimidazole ribonucleotide biosynthesis II	TRUE	TRUE
8-amino-7-oxononanoate biosynthesis II	TRUE	TRUE
8-oxo-(d)GTP detoxification II	TRUE	TRUE
9-cis, 11-trans-octadecadienoyl-CoA degradation (isomerase-dependent, yeast)	TRUE	TRUE
acetaldehyde biosynthesis I	TRUE	TRUE
acetate and ATP formation from acetyl-CoA I	TRUE	TRUE
acetate conversion to acetyl-CoA	TRUE	TRUE
acetate formation from acetyl-CoA (succinate)	TRUE	TRUE
acetoin degradation	TRUE	TRUE
acetyl-CoA fermentation to butanoate clostridia	TRUE	TRUE
acrylate degradation I	TRUE	TRUE
acrylate degradation II	TRUE	TRUE
acyl carrier protein activation	TRUE	TRUE
acyl carrier protein metabolism	TRUE	TRUE
adenine and adenosine salvage I	TRUE	TRUE
adenine and adenosine salvage III	TRUE	TRUE
adenine and adenosine salvage VI	TRUE	TRUE
adenosine deoxyribonucleotides de novo biosynthesis	TRUE	TRUE
adenosine ribonucleotides de novo biosynthesis	TRUE	TRUE
adenosylcobinamide-GDP biosynthesis from cobyrinate a,c-diamide	TRUE	TRUE
aerobic respiration (NDH-1 to cytochrome c oxidase via plastocyanin)	TRUE	TRUE
aerobic respiration I (cytochrome c)	TRUE	TRUE
aerobic respiration II (cytochrome c) (yeast)	TRUE	TRUE
aerobic respiration in cyanobacteria (NDH-2 to cytochrome c oxidase via plastocyanin)	TRUE	TRUE
alanine racemization	TRUE	TRUE
albaflavenone biosynthesis	TRUE	TRUE
alkylnitronates degradation	TRUE	TRUE
ammonia assimilation cycle II	TRUE	TRUE
anaerobic energy metabolism (invertebrates, cytosol)	TRUE	TRUE
androstenedione degradation I (aerobic)	TRUE	TRUE
anteiso-branched-chain fatty acid biosynthesis	TRUE	TRUE
anthranilate degradation I (aerobic)	TRUE	TRUE
arginine deiminase test	TRUE	TRUE
arginine dependent acid resistance	TRUE	TRUE
assimilatory sulfate reduction II	TRUE	TRUE
assimilatory sulfate reduction III	TRUE	TRUE
benzoate degradation II (aerobic and anaerobic)	TRUE	TRUE
betanidin degradation	TRUE	TRUE
betaxanthin biosynthesis	TRUE	TRUE
betaxanthin biosynthesis (via dopamine)	TRUE	TRUE
biotin biosynthesis from 8-amino-7-oxononanoate I	TRUE	TRUE
biotin biosynthesis from 8-amino-7-oxononanoate II	TRUE	TRUE
bis(guanylyl molybdenum cofactor) biosynthesis	TRUE	TRUE
bis(guanylyl tungstenpterin) cofactor biosynthesis	TRUE	TRUE
C4 photosynthetic carbon assimilation cycle, NAD-ME type	TRUE	TRUE
cardiolipin biosynthesis I	TRUE	TRUE
cardiolipin biosynthesis III	TRUE	TRUE
chitin deacetylation	TRUE	TRUE
cholesterol degradation to androstenedione I (cholesterol oxidase)	TRUE	TRUE
cholesterol degradation to androstenedione II (cholesterol dehydrogenase)	TRUE	TRUE
choline degradation I	TRUE	TRUE
choline degradation II	TRUE	TRUE
chorismate biosynthesis from 3-dehydroquinate	TRUE	TRUE
citronellol degradation	TRUE	TRUE
CMP phosphorylation	TRUE	TRUE
cob(II)yrinate a,c-diamide biosynthesis II (late cobalt incorporation)	TRUE	TRUE
coenzyme A biosynthesis I (prokaryotic)	TRUE	TRUE
coenzyme A biosynthesis II (eukaryotic)	TRUE	TRUE
curcumin degradation	TRUE	TRUE
cyclohexane-1-carboxylate degradation (anaerobic)	TRUE	TRUE
cyclopropane fatty acid (CFA) biosynthesis	TRUE	TRUE
cytochrome c biogenesis (system III type)	TRUE	TRUE
cytosolic NADPH production (yeast)	TRUE	TRUE
D-arabitol degradation	TRUE	TRUE
D-malate degradation	TRUE	TRUE
D-xylose degradation II	TRUE	TRUE
demethylmenaquinol-4 biosynthesis	TRUE	TRUE
demethylmenaquinol-6 biosynthesis I	TRUE	TRUE
demethylmenaquinol-8 biosynthesis I	TRUE	TRUE
demethylmenaquinol-9 biosynthesis	TRUE	TRUE
di-trans,poly-cis-undecaprenyl phosphate biosynthesis	TRUE	TRUE
dipyrromethane cofactor biosynthesis	TRUE	TRUE
dolichol and dolichyl phosphate biosynthesis	TRUE	TRUE
dopamine degradation	TRUE	TRUE
dTDP-&beta;-L-rhamnose biosynthesis	TRUE	TRUE
dTMP de novo biosynthesis (mitochondrial)	TRUE	TRUE
ergothioneine biosynthesis I (bacteria)	TRUE	TRUE
ergothioneine biosynthesis II (fungi)	TRUE	TRUE
ethanol degradation I	TRUE	TRUE
ethanol degradation II	TRUE	TRUE
ethanol degradation IV	TRUE	TRUE
ethene biosynthesis III (microbes)	TRUE	TRUE
ethionamide activation	TRUE	TRUE
even iso-branched-chain fatty acid biosynthesis	TRUE	TRUE
F420 Biosynthesis until 3 glutamine residues	TRUE	TRUE
factor 420 biosynthesis I (archaea)	TRUE	TRUE
factor 420 biosynthesis II (mycobacteria)	TRUE	TRUE
factor 420 polyglutamylation	TRUE	TRUE
fatty acid &beta;-oxidation I (generic)	TRUE	TRUE
fatty acid &beta;-oxidation II (plant peroxisome)	TRUE	TRUE
fatty acid &beta;-oxidation III (unsaturated, odd number)	TRUE	TRUE
fatty acid &beta;-oxidation IV (unsaturated, even number)	TRUE	TRUE
fatty acid &beta;-oxidation V (unsaturated, odd number, di-isomerase-dependent)	TRUE	TRUE
fatty acid &beta;-oxidation VI (mammalian peroxisome)	TRUE	TRUE
fatty acid &beta;-oxidation VII (yeast peroxisome)	TRUE	TRUE
fatty acid biosynthesis initiation (mitochondria)	TRUE	TRUE
fatty acid biosynthesis initiation (type I)	TRUE	TRUE
fatty acid elongation -- saturated	TRUE	TRUE
felinine and 3-methyl-3-sulfanylbutan-1-ol biosynthesis	TRUE	TRUE
Ferredoxin:NAD+ oxidoreductase	TRUE	TRUE
ferroxidase	TRUE	TRUE
flavin biosynthesis I (bacteria and plants)	TRUE	TRUE
flavin salvage	TRUE	TRUE
Folate biosynthesis from GTP and 4-aminobenzoate via dihydropterin-3-triphosphate	TRUE	TRUE
folate polyglutamylation	TRUE	TRUE
folate transformations II (plants)	TRUE	TRUE
folate transformations III (E. coli)	TRUE	TRUE
formaldehyde assimilation III (dihydroxyacetone cycle)	TRUE	TRUE
formaldehyde oxidation IV (thiol-independent)	TRUE	TRUE
formaldehyde oxidation VII (THF pathway)	TRUE	TRUE
GDP-mannose biosynthesis	TRUE	TRUE
geranyl diphosphate biosynthesis	TRUE	TRUE
geranylgeranyl diphosphate biosynthesis	TRUE	TRUE
gluconeogenesis III	TRUE	TRUE
glucosylglycerate biosynthesis I	TRUE	TRUE
glucosylglycerol biosynthesis	TRUE	TRUE
glutaminyl-tRNAgln biosynthesis via transamidation	TRUE	TRUE
glutaryl-CoA degradation	TRUE	TRUE
glutathione degradation (DUG pathway - yeast)	TRUE	TRUE
glycerol-3-phosphate shuttle	TRUE	TRUE
glycerol-3-phosphate to cytochrome bo oxidase electron transfer	TRUE	TRUE
glycerophosphodiester degradation	TRUE	TRUE
glycine betaine biosynthesis I (Gram-negative bacteria)	TRUE	TRUE
glycine betaine biosynthesis II (Gram-positive bacteria)	TRUE	TRUE
glycine betaine biosynthesis III (plants)	TRUE	TRUE
glycine betaine degradation I	TRUE	TRUE
glycine betaine degradation II (mammalian)	TRUE	TRUE
glycine biosynthesis I	TRUE	TRUE
glycine biosynthesis II	TRUE	TRUE
glycine biosynthesis III	TRUE	TRUE
glycine biosynthesis IV	TRUE	TRUE
glycine cleavage	TRUE	TRUE
glycogen biosynthesis III (from &alpha;-maltose 1-phosphate)	TRUE	TRUE
glycogen degradation I	TRUE	TRUE
glycogen degradation II	TRUE	TRUE
glycolysis I (from glucose 6-phosphate)	TRUE	TRUE
glycolysis II (from fructose 6-phosphate)	TRUE	TRUE
glycolysis III (from glucose)	TRUE	TRUE
glyoxylate cycle	TRUE	TRUE
guaiacol biosynthesis	TRUE	TRUE
guanine and guanosine salvage	TRUE	TRUE
guanine and guanosine salvage II	TRUE	TRUE
guanosine deoxyribonucleotides de novo biosynthesis I	TRUE	TRUE
guanosine ribonucleotides de novo biosynthesis	TRUE	TRUE
guanylyl molybdenum cofactor biosynthesis	TRUE	TRUE
heme b biosynthesis V (aerobic)	TRUE	TRUE
heterolactic fermentation	TRUE	TRUE
homocysteine and cysteine interconversion	TRUE	TRUE
homotaurine degradation	TRUE	TRUE
hydrogen sulfide biosynthesis II (mammalian)	TRUE	TRUE
hydroxymethylpyrimidine salvage	TRUE	TRUE
hypotaurine degradation	TRUE	TRUE
incomplete reductive TCA cycle	TRUE	TRUE
inosine-5'-phosphate biosynthesis I	TRUE	TRUE
isethionate degradation	TRUE	TRUE
isoniazid activation	TRUE	TRUE
L-alanine biosynthesis I	TRUE	TRUE
L-alanine biosynthesis II	TRUE	TRUE
L-alanine biosynthesis III	TRUE	TRUE
L-alanine degradation III	TRUE	TRUE
L-alanine degradation IV	TRUE	TRUE
L-arginine biosynthesis II (acetyl cycle)	TRUE	TRUE
L-arginine biosynthesis IV (archaea)	TRUE	TRUE
L-arginine degradation III (arginine decarboxylase/agmatinase pathway)	TRUE	TRUE
L-arginine degradation V (arginine deiminase pathway)	TRUE	TRUE
L-arginine degradation X (arginine monooxygenase pathway)	TRUE	TRUE
L-arginine degradation XIII (reductive Stickland reaction)	TRUE	TRUE
L-asparagine biosynthesis I	TRUE	TRUE
L-asparagine biosynthesis III (tRNA-dependent)	TRUE	TRUE
L-asparagine degradation I	TRUE	TRUE
L-aspartate biosynthesis	TRUE	TRUE
L-aspartate degradation I	TRUE	TRUE
L-cysteine biosynthesis III (from L-homocysteine)	TRUE	TRUE
L-cysteine biosynthesis V (mycobacteria)	TRUE	TRUE
L-cysteine degradation II	TRUE	TRUE
L-galactose degradation	TRUE	TRUE
L-glutamate biosynthesis I	TRUE	TRUE
L-glutamate biosynthesis III	TRUE	TRUE
L-glutamate biosynthesis IV	TRUE	TRUE
L-glutamate biosynthesis V	TRUE	TRUE
L-glutamate degradation I	TRUE	TRUE
L-glutamate degradation II	TRUE	TRUE
L-glutamate degradation IX (via 4-aminobutanoate)	TRUE	TRUE
L-glutamine biosynthesis I	TRUE	TRUE
L-glutamine biosynthesis III	TRUE	TRUE
L-glutamine degradation I	TRUE	TRUE
L-glutamine degradation II	TRUE	TRUE
L-gulonate degradation	TRUE	TRUE
L-histidine biosynthesis	TRUE	TRUE
L-homocysteine biosynthesis	TRUE	TRUE
L-homoserine biosynthesis	TRUE	TRUE
L-isoleucine biosynthesis I (from threonine)	TRUE	TRUE
L-isoleucine degradation I	TRUE	TRUE
L-lactaldehyde degradation (aerobic)	TRUE	TRUE
L-leucine biosynthesis	TRUE	TRUE
L-leucine degradation I	TRUE	TRUE
L-lysine biosynthesis I	TRUE	TRUE
L-lysine degradation IV	TRUE	TRUE
L-lysine degradation VI	TRUE	TRUE
L-lysine degradation X	TRUE	TRUE
L-lysine degradation XI (mammalian)	TRUE	TRUE
L-malate degradation I	TRUE	TRUE
L-malate degradation II	TRUE	TRUE
L-methionine biosynthesis I	TRUE	TRUE
L-methionine biosynthesis II	TRUE	TRUE
L-methionine degradation II	TRUE	TRUE
L-ornithine biosynthesis I	TRUE	TRUE
L-phenylalanine biosynthesis I	TRUE	TRUE
L-phenylalanine degradation II (anaerobic)	TRUE	TRUE
L-phenylalanine degradation III	TRUE	TRUE
L-proline biosynthesis I (from L-glutamate)	TRUE	TRUE
L-proline biosynthesis III (from L-ornithine)	TRUE	TRUE
L-serine biosynthesis I	TRUE	TRUE
L-serine degradation	TRUE	TRUE
L-threonine biosynthesis	TRUE	TRUE
L-threonine degradation IV	TRUE	TRUE
L-threonine degradation V	TRUE	TRUE
L-tryptophan biosynthesis	TRUE	TRUE
L-tryptophan biosynthesis (complex)	TRUE	TRUE
L-tyrosine biosynthesis I	TRUE	TRUE
L-valine biosynthesis	TRUE	TRUE
L-valine degradation I	TRUE	TRUE
leucyl aminopeptidase test	TRUE	TRUE
lipoate biosynthesis and incorporation I	TRUE	TRUE
long-chain fatty acid activation	TRUE	TRUE
malate/L-aspartate shuttle pathway	TRUE	TRUE
menaquinol-10 biosynthesis	TRUE	TRUE
menaquinol-11 biosynthesis	TRUE	TRUE
menaquinol-12 biosynthesis	TRUE	TRUE
menaquinol-13 biosynthesis	TRUE	TRUE
menaquinol-4 biosynthesis I	TRUE	TRUE
menaquinol-6 biosynthesis	TRUE	TRUE
menaquinol-7 biosynthesis	TRUE	TRUE
menaquinol-8 biosynthesis	TRUE	TRUE
menaquinol-9 biosynthesis	TRUE	TRUE
methylerythritol phosphate pathway I	TRUE	TRUE
methylerythritol phosphate pathway II	TRUE	TRUE
methylglyoxal degradation V	TRUE	TRUE
methylsalicylate degradation	TRUE	TRUE
methylthiopropanoate degradation I (cleavage)	TRUE	TRUE
mitochondrial NADPH production (yeast)	TRUE	TRUE
mixed acid fermentation	TRUE	TRUE
molybdopterin biosynthesis	TRUE	TRUE
mono-trans, poly-cis decaprenyl phosphate biosynthesis	TRUE	TRUE
monoacylglycerol metabolism (yeast)	TRUE	TRUE
mycofactocin biosynthesis	TRUE	TRUE
mycolate biosynthesis	TRUE	TRUE
mycolyl-arabinogalactan-peptidoglycan complex biosynthesis	TRUE	TRUE
mycothiol biosynthesis	TRUE	TRUE
mycothiol-mediated detoxification	TRUE	TRUE
myo-inositol biosynthesis	TRUE	TRUE
N-acetylglutaminylglutamine amide biosynthesis	TRUE	TRUE
N6-L-threonylcarbamoyladenosine37-modified tRNA biosynthesis	TRUE	TRUE
NAD biosynthesis from 2-amino-3-carboxymuconate semialdehyde	TRUE	TRUE
NAD de novo biosynthesis I (from aspartate)	TRUE	TRUE
NAD phosphorylation and dephosphorylation	TRUE	TRUE
NAD phosphorylation and transhydrogenation	TRUE	TRUE
NAD salvage (plants)	TRUE	TRUE
NAD salvage pathway III (to nicotinamide riboside)	TRUE	TRUE
NAD salvage pathway V (PNC V cycle)	TRUE	TRUE
NAD(P)/NADPH interconversion	TRUE	TRUE
NADH repair (prokaryotes)	TRUE	TRUE
NADH to cytochrome bd oxidase electron transfer I	TRUE	TRUE
NADH to cytochrome bd oxidase electron transfer II	TRUE	TRUE
NADH to cytochrome bo oxidase electron transfer I	TRUE	TRUE
NADH to cytochrome bo oxidase electron transfer II	TRUE	TRUE
NADH:menaquinone6 oxidoreductase	TRUE	TRUE
NADP biosynthesis	TRUE	TRUE
NADPH repair (prokaryotes)	TRUE	TRUE
nitrate reduction V (assimilatory)	TRUE	TRUE
nitrate reduction VI (assimilatory)	TRUE	TRUE
nitric oxide biosynthesis I (plants)	TRUE	TRUE
nitric oxide biosynthesis II (mammals)	TRUE	TRUE
nitroethane degradation	TRUE	TRUE
nonaprenyl diphosphate biosynthesis II	TRUE	TRUE
noradrenaline and adrenaline degradation	TRUE	TRUE
nylon-6 oligomer degradation	TRUE	TRUE
octane oxidation	TRUE	TRUE
odd iso-branched-chain fatty acid biosynthesis	TRUE	TRUE
oleate &beta;-oxidation	TRUE	TRUE
oxalate degradation IV	TRUE	TRUE
palmitate biosynthesis (type I fatty acid synthase)	TRUE	TRUE
palmitate biosynthesis (type II fatty acid synthase)	TRUE	TRUE
partial TCA cycle (obligate autotrophs)	TRUE	TRUE
pentose phosphate pathway (non-oxidative branch) I	TRUE	TRUE
pentose phosphate pathway (non-oxidative branch) II	TRUE	TRUE
pentose phosphate pathway (oxidative branch) I	TRUE	TRUE
pentose phosphate pathway (partial)	TRUE	TRUE
peptidoglycan biosynthesis I (meso-diaminopimelate containing)	TRUE	TRUE
phenylethylamine degradation I	TRUE	TRUE
Phosphate ABC transporter	TRUE	TRUE
phosphate acquisition	TRUE	TRUE
phosphatidylinositol biosynthesis II (eukaryotes)	TRUE	TRUE
phosphatidylinositol mannoside biosynthesis	TRUE	TRUE
phosphatidylserine and phosphatidylethanolamine biosynthesis I	TRUE	TRUE
phosphopantothenate biosynthesis I	TRUE	TRUE
phytol degradation	TRUE	TRUE
polyhydroxybutanoate biosynthesis	TRUE	TRUE
polyphosphate metabolism	TRUE	TRUE
ppGpp metabolism	TRUE	TRUE
progesterone biosynthesis	TRUE	TRUE
propanoate fermentation to 2-methylbutanoate	TRUE	TRUE
propanoyl-CoA degradation II	TRUE	TRUE
protein O-mannosylation II (mammals, core M1 and core M2)	TRUE	TRUE
protein Pupylation and dePupylation	TRUE	TRUE
PRPP biosynthesis	TRUE	TRUE
purine deoxyribonucleosides degradation I	TRUE	TRUE
purine deoxyribonucleosides degradation II	TRUE	TRUE
purine ribonucleosides degradation	TRUE	TRUE
putrescine biosynthesis I	TRUE	TRUE
putrescine degradation I	TRUE	TRUE
putrescine degradation IV	TRUE	TRUE
putrescine degradation V	TRUE	TRUE
pyrimidine deoxyribonucleotide phosphorylation	TRUE	TRUE
pyrimidine deoxyribonucleotides biosynthesis from CTP	TRUE	TRUE
pyrimidine deoxyribonucleotides de novo biosynthesis I	TRUE	TRUE
pyrimidine deoxyribonucleotides de novo biosynthesis III	TRUE	TRUE
pyrimidine deoxyribonucleotides de novo biosynthesis IV	TRUE	TRUE
pyrimidine nucleobases salvage I	TRUE	TRUE
pyruvate decarboxylation to acetyl CoA I	TRUE	TRUE
pyruvate fermentation to (R)-acetoin I	TRUE	TRUE
pyruvate fermentation to acetate II	TRUE	TRUE
pyruvate fermentation to isobutanol (engineered)	TRUE	TRUE
pyruvate fermentation to propanoate I	TRUE	TRUE
pyruvate to cytochrome bd oxidase electron transfer	TRUE	TRUE
pyruvate to cytochrome bo oxidase electron transfer	TRUE	TRUE
queuosine biosynthesis II (queuine salvage)	TRUE	TRUE
rosamicin biosynthesis	TRUE	TRUE
S-adenosyl-L-methionine biosynthesis	TRUE	TRUE
S-adenosyl-L-methionine salvage II	TRUE	TRUE
S-methyl-5'-thioadenosine degradation II	TRUE	TRUE
sedoheptulose bisphosphate bypass	TRUE	TRUE
serotonin degradation	TRUE	TRUE
spermine and spermidine degradation II	TRUE	TRUE
starch degradation V	TRUE	TRUE
stearate biosynthesis II (bacteria and plants)	TRUE	TRUE
stearate biosynthesis III (fungi)	TRUE	TRUE
succinate to cytochrome bd oxidase electron transfer	TRUE	TRUE
succinate to cytochrome bo oxidase electron transfer	TRUE	TRUE
succinoglycan biosynthesis	TRUE	TRUE
sulfate activation for sulfonation	TRUE	TRUE
sulfite oxidation IV (sulfite oxidase)	TRUE	TRUE
sulfoacetaldehyde degradation I	TRUE	TRUE
superoxide radicals degradation	TRUE	TRUE
taurine degradation I	TRUE	TRUE
taurine degradation III	TRUE	TRUE
TCA cycle I (prokaryotic)	TRUE	TRUE
TCA cycle II (plants and fungi)	TRUE	TRUE
TCA cycle IV (2-oxoglutarate decarboxylase)	TRUE	TRUE
TCA cycle V (2-oxoglutarate synthase)	TRUE	TRUE
TCA cycle VII (acetate-producers)	TRUE	TRUE
tetrahydrofolate biosynthesis	TRUE	TRUE
tetrahydrofolate salvage from 5,10-methenyltetrahydrofolate	TRUE	TRUE
tetrapyrrole biosynthesis I (from glutamate)	TRUE	TRUE
thiamine diphosphate biosynthesis I (E. coli)	TRUE	TRUE
thiamine diphosphate biosynthesis II (Bacillus)	TRUE	TRUE
thiosulfate disproportionation IV (rhodanese)	TRUE	TRUE
Threonine biosynthis from aspartate via homoserine (gapseq)	TRUE	TRUE
trans, trans-farnesyl diphosphate biosynthesis	TRUE	TRUE
trehalose biosynthesis I	TRUE	TRUE
trehalose biosynthesis II	TRUE	TRUE
trehalose biosynthesis IV	TRUE	TRUE
trehalose biosynthesis V	TRUE	TRUE
trehalose biosynthesis VII	TRUE	TRUE
trehalose degradation I (low osmolarity)	TRUE	TRUE
trehalose degradation II (cytosolic)	TRUE	TRUE
trehalose degradation IV	TRUE	TRUE
trehalose degradation V	TRUE	TRUE
trehalose degradation VI (periplasmic)	TRUE	TRUE
tRNA charging	TRUE	TRUE
UDP-&alpha;-D-galactose biosynthesis	TRUE	TRUE
UDP-&alpha;-D-glucuronate biosynthesis (from UDP-glucose)	TRUE	TRUE
UDP-N-acetyl-D-galactosamine biosynthesis I	TRUE	TRUE
UDP-N-acetyl-D-galactosamine biosynthesis II	TRUE	TRUE
UDP-N-acetyl-D-glucosamine biosynthesis I	TRUE	TRUE
UDP-N-acetyl-D-glucosamine biosynthesis II	TRUE	TRUE
UDP-N-acetylmuramoyl-pentapeptide biosynthesis I (meso-diaminopimelate containing)	TRUE	TRUE
UMP biosynthesis I	TRUE	TRUE
urea degradation II	TRUE	TRUE
UTP and CTP de novo biosynthesis	TRUE	TRUE
valproate &beta;-oxidation	TRUE	TRUE
xylitol degradation	TRUE	TRUE

## Sheet: Online Resource 3
Online Resource 3. Presence/absence patterns of metabolic pathways in M. omidense and M. vaccae, its closest relative species. GapSeq was used to determine the presence of metabolic pathways. Pathways present in at least one of the species are shown here with the presence/absence patterns where TRUE means present and FALSE means absent.
Name	M. omidense	M. vaccae
acetate and ATP formation from acetyl-CoA II	TRUE	FALSE
arginine dependent acid resistance	TRUE	FALSE
betaxanthin biosynthesis	TRUE	FALSE
betaxanthin biosynthesis (via dopamine)	TRUE	FALSE
ectoine biosynthesis	TRUE	FALSE
glycerol degradation II	TRUE	FALSE
L-arginine degradation III (arginine decarboxylase/agmatinase pathway)	TRUE	FALSE
L-arginine degradation X (arginine monooxygenase pathway)	TRUE	FALSE
L-threitol degradation	TRUE	FALSE
linezolid resistance	TRUE	FALSE
nitroethane degradation	TRUE	FALSE
phosphonoacetate degradation	TRUE	FALSE
phthalate degradation (aerobic)	TRUE	FALSE
propane degradation II	TRUE	FALSE
putrescine biosynthesis I	TRUE	FALSE
S-methyl-5'-thioadenosine degradation IV	TRUE	FALSE
1,3-propanediol biosynthesis (engineered)	FALSE	TRUE
2-methylcitrate cycle II	FALSE	TRUE
3-methylbutanol biosynthesis (engineered)	FALSE	TRUE
anthranilate degradation II (aerobic)	FALSE	TRUE
assimilatory sulfate reduction IV	FALSE	TRUE
cadaverine biosynthesis	FALSE	TRUE
cob(II)yrinate a,c-diamide biosynthesis II (late cobalt incorporation)	FALSE	TRUE
cyanide degradation	FALSE	TRUE
cyclohexanol degradation	FALSE	TRUE
dTDP-4-O-demethyl-&beta;-L-noviose biosynthesis	FALSE	TRUE
ethylene glycol degradation	FALSE	TRUE
GDP-6-deoxy-D-talose biosynthesis	FALSE	TRUE
GDP-D-rhamnose biosynthesis	FALSE	TRUE
GDP-L-fucose biosynthesis I (from GDP-D-mannose)	FALSE	TRUE
glyphosate degradation II	FALSE	TRUE
heme b biosynthesis V (aerobic)	FALSE	TRUE
homocysteine and cysteine interconversion	FALSE	TRUE
hydrogen sulfide biosynthesis II (mammalian)	FALSE	TRUE
indole-3-acetate biosynthesis V (bacteria and fungi)	FALSE	TRUE
L-alanine degradation IV	FALSE	TRUE
L-cysteine biosynthesis III (from L-homocysteine)	FALSE	TRUE
L-glutamine biosynthesis III	FALSE	TRUE
L-homocysteine biosynthesis	FALSE	TRUE
L-lactaldehyde degradation (anaerobic)	FALSE	TRUE
L-methionine biosynthesis I	FALSE	TRUE
L-ornithine biosynthesis II	FALSE	TRUE
L-proline biosynthesis I (from L-glutamate)	FALSE	TRUE
L-threonine degradation II	FALSE	TRUE
L-threonine degradation III (to methylglyoxal)	FALSE	TRUE
L-tryptophan biosynthesis	FALSE	TRUE
mandelate degradation I	FALSE	TRUE
methylglyoxal degradation VI	FALSE	TRUE
methymycin, neomethymycin and novamethymycin biosynthesis	FALSE	TRUE
mixed acid fermentation	FALSE	TRUE
narbomycin, pikromycin and novapikromycin biosynthesis	FALSE	TRUE
pinobanksin biosynthesis	FALSE	TRUE
rosamicin biosynthesis	FALSE	TRUE
siroheme biosynthesis	FALSE	TRUE
sulfate reduction I (assimilatory)	FALSE	TRUE
sulfide oxidation I (to sulfur globules)	FALSE	TRUE
sulfoacetaldehyde degradation I	FALSE	TRUE
tetracycline resistance	FALSE	TRUE
thiazole component of thiamine diphosphate biosynthesis II	FALSE	TRUE
UDP-&alpha;-D-galacturonate biosynthesis I (from UDP-D-glucuronate)	FALSE	TRUE
(S,S)-butanediol biosynthesis	TRUE	TRUE
(S,S)-butanediol degradation	TRUE	TRUE
(S)-lactate fermentation to propanoate	TRUE	TRUE
&beta;-alanine biosynthesis I	TRUE	TRUE
&beta;-alanine biosynthesis II	TRUE	TRUE
&beta;-alanine biosynthesis IV	TRUE	TRUE
&beta;-alanine degradation I	TRUE	TRUE
&beta;-alanine degradation II	TRUE	TRUE
2-carboxy-1,4-naphthoquinol biosynthesis	TRUE	TRUE
2-chlorobenzoate degradation	TRUE	TRUE
2-methyl-branched fatty acid &beta;-oxidation	TRUE	TRUE
2-methyladeninyl adenosylcobamide biosynthesis from adenosylcobinamide-GDP	TRUE	TRUE
2-oxoglutarate decarboxylation to succinyl-CoA	TRUE	TRUE
2-oxoisovalerate decarboxylation to isobutanoyl-CoA	TRUE	TRUE
3-(4-hydroxyphenyl)pyruvate biosynthesis	TRUE	TRUE
3-dehydroquinate biosynthesis I	TRUE	TRUE
3-hydroxybutyryl-CoA dehydrogenase	TRUE	TRUE
4-aminobenzoate biosynthesis	TRUE	TRUE
4-aminobutanoate degradation I	TRUE	TRUE
4-aminobutanoate degradation II	TRUE	TRUE
4-aminobutanoate degradation III	TRUE	TRUE
5-aminoimidazole ribonucleotide biosynthesis I	TRUE	TRUE
5-aminoimidazole ribonucleotide biosynthesis II	TRUE	TRUE
5-hydroxybenzimidazolyl adenosylcobamide biosynthesis from adenosylcobinamide-GDP	TRUE	TRUE
5-methoxy-6-methylbenzimidazolyl adenosylcobamide biosynthesis from adenosylcobinamide-GDP	TRUE	TRUE
5-methoxybenzimidazolyl adenosylcobamide biosynthesis from adenosylcobinamide-GDP	TRUE	TRUE
5-methylbenzimidazolyl adenosylcobamide biosynthesis from adenosylcobinamide-GDP	TRUE	TRUE
8-amino-7-oxononanoate biosynthesis II	TRUE	TRUE
8-oxo-(d)GTP detoxification II	TRUE	TRUE
9-cis, 11-trans-octadecadienoyl-CoA degradation (isomerase-dependent, yeast)	TRUE	TRUE
acetaldehyde biosynthesis I	TRUE	TRUE
acetate and ATP formation from acetyl-CoA I	TRUE	TRUE
acetate conversion to acetyl-CoA	TRUE	TRUE
acetoin degradation	TRUE	TRUE
acetylene degradation (anaerobic)	TRUE	TRUE
acrylate degradation I	TRUE	TRUE
acrylate degradation II	TRUE	TRUE
acyl carrier protein activation	TRUE	TRUE
acyl carrier protein metabolism	TRUE	TRUE
adenine and adenosine salvage I	TRUE	TRUE
adenine and adenosine salvage III	TRUE	TRUE
adenine and adenosine salvage VI	TRUE	TRUE
adeninyl adenosylcobamide biosynthesis from adenosylcobinamide-GDP	TRUE	TRUE
adenosine deoxyribonucleotides de novo biosynthesis	TRUE	TRUE
adenosine nucleotides degradation III	TRUE	TRUE
adenosine ribonucleotides de novo biosynthesis	TRUE	TRUE
adenosylcobalamin biosynthesis from adenosylcobinamide-GDP I	TRUE	TRUE
adenosylcobinamide-GDP biosynthesis from cobyrinate a,c-diamide	TRUE	TRUE
aerobic respiration (NDH-1 to cytochrome c oxidase via plastocyanin)	TRUE	TRUE
aerobic respiration I (cytochrome c)	TRUE	TRUE
aerobic respiration II (cytochrome c) (yeast)	TRUE	TRUE
aerobic respiration in cyanobacteria (NDH-2 to cytochrome c oxidase via plastocyanin)	TRUE	TRUE
alanine racemization	TRUE	TRUE
albaflavenone biosynthesis	TRUE	TRUE
alkylnitronates degradation	TRUE	TRUE
ammonia assimilation cycle II	TRUE	TRUE
anaerobic energy metabolism (invertebrates, cytosol)	TRUE	TRUE
androstenedione degradation I (aerobic)	TRUE	TRUE
anteiso-branched-chain fatty acid biosynthesis	TRUE	TRUE
anthranilate degradation I (aerobic)	TRUE	TRUE
arginine deiminase test	TRUE	TRUE
assimilatory sulfate reduction II	TRUE	TRUE
assimilatory sulfate reduction III	TRUE	TRUE
benzimidazolyl adenosylcobamide biosynthesis from adenosylcobinamide-GDP	TRUE	TRUE
benzoate degradation I (aerobic)	TRUE	TRUE
betanidin degradation	TRUE	TRUE
biotin biosynthesis from 8-amino-7-oxononanoate I	TRUE	TRUE
biotin biosynthesis from 8-amino-7-oxononanoate II	TRUE	TRUE
bis(guanylyl molybdenum cofactor) biosynthesis	TRUE	TRUE
bis(guanylyl tungstenpterin) cofactor biosynthesis	TRUE	TRUE
C4 photosynthetic carbon assimilation cycle, NAD-ME type	TRUE	TRUE
cardiolipin biosynthesis I	TRUE	TRUE
cardiolipin biosynthesis III	TRUE	TRUE
cephalosporin C biosynthesis	TRUE	TRUE
chitin deacetylation	TRUE	TRUE
cholesterol degradation to androstenedione I (cholesterol oxidase)	TRUE	TRUE
cholesterol degradation to androstenedione II (cholesterol dehydrogenase)	TRUE	TRUE
choline degradation I	TRUE	TRUE
choline degradation II	TRUE	TRUE
chorismate biosynthesis from 3-dehydroquinate	TRUE	TRUE
citronellol degradation	TRUE	TRUE
CMP phosphorylation	TRUE	TRUE
coenzyme A biosynthesis I (prokaryotic)	TRUE	TRUE
coenzyme A biosynthesis II (eukaryotic)	TRUE	TRUE
curcumin degradation	TRUE	TRUE
cyclohexane-1-carboxylate degradation (anaerobic)	TRUE	TRUE
cyclopropane fatty acid (CFA) biosynthesis	TRUE	TRUE
cytochrome c biogenesis (system III type)	TRUE	TRUE
cytosolic NADPH production (yeast)	TRUE	TRUE
D-malate degradation	TRUE	TRUE
D-threitol degradation	TRUE	TRUE
D-xylose degradation I	TRUE	TRUE
D-xylose degradation II	TRUE	TRUE
demethylmenaquinol-4 biosynthesis	TRUE	TRUE
demethylmenaquinol-6 biosynthesis I	TRUE	TRUE
demethylmenaquinol-8 biosynthesis I	TRUE	TRUE
demethylmenaquinol-9 biosynthesis	TRUE	TRUE
di-trans,poly-cis-undecaprenyl phosphate biosynthesis	TRUE	TRUE
dimethyl sulfoxide degradation	TRUE	TRUE
dipyrromethane cofactor biosynthesis	TRUE	TRUE
dolichol and dolichyl phosphate biosynthesis	TRUE	TRUE
dopamine degradation	TRUE	TRUE
dTDP-&beta;-L-rhamnose biosynthesis	TRUE	TRUE
dTMP de novo biosynthesis (mitochondrial)	TRUE	TRUE
ergothioneine biosynthesis I (bacteria)	TRUE	TRUE
ergothioneine biosynthesis II (fungi)	TRUE	TRUE
erythritol degradation II	TRUE	TRUE
ethanol degradation I	TRUE	TRUE
ethanol degradation II	TRUE	TRUE
ethanol degradation IV	TRUE	TRUE
ethene biosynthesis III (microbes)	TRUE	TRUE
ethionamide activation	TRUE	TRUE
even iso-branched-chain fatty acid biosynthesis	TRUE	TRUE
F420 Biosynthesis until 3 glutamine residues	TRUE	TRUE
factor 420 biosynthesis I (archaea)	TRUE	TRUE
factor 420 biosynthesis II (mycobacteria)	TRUE	TRUE
factor 420 polyglutamylation	TRUE	TRUE
fatty acid &beta;-oxidation I (generic)	TRUE	TRUE
fatty acid &beta;-oxidation II (plant peroxisome)	TRUE	TRUE
fatty acid &beta;-oxidation III (unsaturated, odd number)	TRUE	TRUE
fatty acid &beta;-oxidation IV (unsaturated, even number)	TRUE	TRUE
fatty acid &beta;-oxidation V (unsaturated, odd number, di-isomerase-dependent)	TRUE	TRUE
fatty acid &beta;-oxidation VI (mammalian peroxisome)	TRUE	TRUE
fatty acid &beta;-oxidation VII (yeast peroxisome)	TRUE	TRUE
fatty acid biosynthesis initiation (mitochondria)	TRUE	TRUE
fatty acid biosynthesis initiation (type I)	TRUE	TRUE
fatty acid elongation -- saturated	TRUE	TRUE
felinine and 3-methyl-3-sulfanylbutan-1-ol biosynthesis	TRUE	TRUE
Ferredoxin:NAD+ oxidoreductase	TRUE	TRUE
ferroxidase	TRUE	TRUE
flavin biosynthesis I (bacteria and plants)	TRUE	TRUE
flavin salvage	TRUE	TRUE
Folate biosynthesis from GTP and 4-aminobenzoate via dihydropterin-3-triphosphate	TRUE	TRUE
folate polyglutamylation	TRUE	TRUE
folate transformations II (plants)	TRUE	TRUE
folate transformations III (E. coli)	TRUE	TRUE
formaldehyde assimilation III (dihydroxyacetone cycle)	TRUE	TRUE
formaldehyde oxidation IV (thiol-independent)	TRUE	TRUE
formaldehyde oxidation VII (THF pathway)	TRUE	TRUE
formate oxidation to CO2	TRUE	TRUE
formate to dimethyl sulfoxide electron transfer	TRUE	TRUE
formate to trimethylamine N-oxide electron transfer	TRUE	TRUE
GDP-mannose biosynthesis	TRUE	TRUE
geranyl diphosphate biosynthesis	TRUE	TRUE
geranylgeranyl diphosphate biosynthesis	TRUE	TRUE
gluconeogenesis I	TRUE	TRUE
gluconeogenesis III	TRUE	TRUE
glucosylglycerate biosynthesis I	TRUE	TRUE
glucosylglycerol biosynthesis	TRUE	TRUE
glutaminyl-tRNAgln biosynthesis via transamidation	TRUE	TRUE
glutaryl-CoA degradation	TRUE	TRUE
glutathione degradation (DUG pathway - yeast)	TRUE	TRUE
glycerol-3-phosphate shuttle	TRUE	TRUE
glycerol-3-phosphate to cytochrome bo oxidase electron transfer	TRUE	TRUE
glycerophosphodiester degradation	TRUE	TRUE
glycine betaine biosynthesis I (Gram-negative bacteria)	TRUE	TRUE
glycine betaine biosynthesis II (Gram-positive bacteria)	TRUE	TRUE
glycine betaine biosynthesis III (plants)	TRUE	TRUE
glycine betaine degradation I	TRUE	TRUE
glycine betaine degradation II (mammalian)	TRUE	TRUE
glycine biosynthesis I	TRUE	TRUE
glycine biosynthesis II	TRUE	TRUE
glycine biosynthesis III	TRUE	TRUE
glycine biosynthesis IV	TRUE	TRUE
glycine cleavage	TRUE	TRUE
glycogen biosynthesis III (from &alpha;-maltose 1-phosphate)	TRUE	TRUE
glycogen degradation I	TRUE	TRUE
glycogen degradation II	TRUE	TRUE
glycolysis I (from glucose 6-phosphate)	TRUE	TRUE
glycolysis II (from fructose 6-phosphate)	TRUE	TRUE
glycolysis III (from glucose)	TRUE	TRUE
glyoxylate cycle	TRUE	TRUE
guaiacol biosynthesis	TRUE	TRUE
guanine and guanosine salvage	TRUE	TRUE
guanine and guanosine salvage II	TRUE	TRUE
guanosine deoxyribonucleotides de novo biosynthesis I	TRUE	TRUE
guanosine ribonucleotides de novo biosynthesis	TRUE	TRUE
guanylyl molybdenum cofactor biosynthesis	TRUE	TRUE
heterolactic fermentation	TRUE	TRUE
homotaurine degradation	TRUE	TRUE
hydroxymethylpyrimidine salvage	TRUE	TRUE
hypotaurine degradation	TRUE	TRUE
incomplete reductive TCA cycle	TRUE	TRUE
indigo biosynthesis	TRUE	TRUE
indole-3-acetate biosynthesis I	TRUE	TRUE
inosine-5'-phosphate biosynthesis I	TRUE	TRUE
isethionate degradation	TRUE	TRUE
isoniazid activation	TRUE	TRUE
L-alanine biosynthesis I	TRUE	TRUE
L-alanine biosynthesis II	TRUE	TRUE
L-alanine biosynthesis III	TRUE	TRUE
L-alanine degradation III	TRUE	TRUE
L-arabinose degradation II	TRUE	TRUE
L-arginine biosynthesis II (acetyl cycle)	TRUE	TRUE
L-arginine biosynthesis IV (archaea)	TRUE	TRUE
L-arginine degradation V (arginine deiminase pathway)	TRUE	TRUE
L-arginine degradation XII	TRUE	TRUE
L-arginine degradation XIII (reductive Stickland reaction)	TRUE	TRUE
L-asparagine biosynthesis I	TRUE	TRUE
L-asparagine biosynthesis III (tRNA-dependent)	TRUE	TRUE
L-asparagine degradation I	TRUE	TRUE
L-aspartate biosynthesis	TRUE	TRUE
L-aspartate degradation I	TRUE	TRUE
L-cysteine biosynthesis V (mycobacteria)	TRUE	TRUE
L-cysteine degradation II	TRUE	TRUE
L-galactose degradation	TRUE	TRUE
L-glutamate biosynthesis I	TRUE	TRUE
L-glutamate biosynthesis II	TRUE	TRUE
L-glutamate biosynthesis III	TRUE	TRUE
L-glutamate biosynthesis IV	TRUE	TRUE
L-glutamate biosynthesis V	TRUE	TRUE
L-glutamate degradation I	TRUE	TRUE
L-glutamate degradation II	TRUE	TRUE
L-glutamate degradation IX (via 4-aminobutanoate)	TRUE	TRUE
L-glutamate degradation X	TRUE	TRUE
L-glutamine biosynthesis I	TRUE	TRUE
L-glutamine degradation I	TRUE	TRUE
L-glutamine degradation II	TRUE	TRUE
L-gulonate degradation	TRUE	TRUE
L-histidine biosynthesis	TRUE	TRUE
L-homoserine biosynthesis	TRUE	TRUE
L-isoleucine biosynthesis I (from threonine)	TRUE	TRUE
L-isoleucine degradation I	TRUE	TRUE
L-lactaldehyde degradation (aerobic)	TRUE	TRUE
L-leucine biosynthesis	TRUE	TRUE
L-leucine degradation I	TRUE	TRUE
L-lysine biosynthesis I	TRUE	TRUE
L-lysine degradation VI	TRUE	TRUE
L-lysine degradation X	TRUE	TRUE
L-lysine degradation XI (mammalian)	TRUE	TRUE
L-malate degradation I	TRUE	TRUE
L-malate degradation II	TRUE	TRUE
L-methionine biosynthesis II	TRUE	TRUE
L-methionine degradation II	TRUE	TRUE
L-ornithine biosynthesis I	TRUE	TRUE
L-phenylalanine biosynthesis I	TRUE	TRUE
L-phenylalanine degradation II (anaerobic)	TRUE	TRUE
L-phenylalanine degradation III	TRUE	TRUE
L-proline biosynthesis III (from L-ornithine)	TRUE	TRUE
L-selenocysteine biosynthesis I (bacteria)	TRUE	TRUE
L-serine biosynthesis I	TRUE	TRUE
L-serine degradation	TRUE	TRUE
L-threonine biosynthesis	TRUE	TRUE
L-threonine degradation IV	TRUE	TRUE
L-threonine degradation V	TRUE	TRUE
L-tryptophan biosynthesis (complex)	TRUE	TRUE
L-tyrosine biosynthesis I	TRUE	TRUE
L-valine biosynthesis	TRUE	TRUE
L-valine degradation I	TRUE	TRUE
leucyl aminopeptidase test	TRUE	TRUE
linuron degradation	TRUE	TRUE
lipoate biosynthesis and incorporation I	TRUE	TRUE
long-chain fatty acid activation	TRUE	TRUE
malate/L-aspartate shuttle pathway	TRUE	TRUE
menaquinol-10 biosynthesis	TRUE	TRUE
menaquinol-11 biosynthesis	TRUE	TRUE
menaquinol-12 biosynthesis	TRUE	TRUE
menaquinol-13 biosynthesis	TRUE	TRUE
menaquinol-4 biosynthesis I	TRUE	TRUE
menaquinol-6 biosynthesis	TRUE	TRUE
menaquinol-7 biosynthesis	TRUE	TRUE
menaquinol-8 biosynthesis	TRUE	TRUE
menaquinol-9 biosynthesis	TRUE	TRUE
meso-butanediol biosynthesis I	TRUE	TRUE
methylerythritol phosphate pathway I	TRUE	TRUE
methylerythritol phosphate pathway II	TRUE	TRUE
methylglyoxal degradation V	TRUE	TRUE
methylsalicylate degradation	TRUE	TRUE
methylthiopropanoate degradation I (cleavage)	TRUE	TRUE
mitochondrial NADPH production (yeast)	TRUE	TRUE
mono-trans, poly-cis decaprenyl phosphate biosynthesis	TRUE	TRUE
monoacylglycerol metabolism (yeast)	TRUE	TRUE
mycofactocin biosynthesis	TRUE	TRUE
mycolate biosynthesis	TRUE	TRUE
mycolyl-arabinogalactan-peptidoglycan complex biosynthesis	TRUE	TRUE
mycothiol biosynthesis	TRUE	TRUE
mycothiol-mediated detoxification	TRUE	TRUE
myo-inositol biosynthesis	TRUE	TRUE
N-acetylglutaminylglutamine amide biosynthesis	TRUE	TRUE
N6-L-threonylcarbamoyladenosine37-modified tRNA biosynthesis	TRUE	TRUE
NAD biosynthesis from 2-amino-3-carboxymuconate semialdehyde	TRUE	TRUE
NAD de novo biosynthesis I (from aspartate)	TRUE	TRUE
NAD phosphorylation and dephosphorylation	TRUE	TRUE
NAD phosphorylation and transhydrogenation	TRUE	TRUE
NAD salvage (plants)	TRUE	TRUE
NAD salvage pathway III (to nicotinamide riboside)	TRUE	TRUE
NAD salvage pathway V (PNC V cycle)	TRUE	TRUE
NAD(P)/NADPH interconversion	TRUE	TRUE
NADH repair (prokaryotes)	TRUE	TRUE
NADH to cytochrome bd oxidase electron transfer I	TRUE	TRUE
NADH to cytochrome bd oxidase electron transfer II	TRUE	TRUE
NADH to cytochrome bo oxidase electron transfer I	TRUE	TRUE
NADH to cytochrome bo oxidase electron transfer II	TRUE	TRUE
NADH:menaquinone6 oxidoreductase	TRUE	TRUE
NADP biosynthesis	TRUE	TRUE
NADPH repair (prokaryotes)	TRUE	TRUE
nitrate reduction II (assimilatory)	TRUE	TRUE
nitrate reduction III (dissimilatory)	TRUE	TRUE
nitrate reduction V (assimilatory)	TRUE	TRUE
nitrate reduction VI (assimilatory)	TRUE	TRUE
nitrate reduction VIIIb (dissimilatory)	TRUE	TRUE
nitric oxide biosynthesis I (plants)	TRUE	TRUE
nitric oxide biosynthesis II (mammals)	TRUE	TRUE
nitrite oxidation	TRUE	TRUE
nonaprenyl diphosphate biosynthesis II	TRUE	TRUE
noradrenaline and adrenaline degradation	TRUE	TRUE
nylon-6 oligomer degradation	TRUE	TRUE
octane oxidation	TRUE	TRUE
odd iso-branched-chain fatty acid biosynthesis	TRUE	TRUE
oleate &beta;-oxidation	TRUE	TRUE
oleate biosynthesis II (animals and fungi)	TRUE	TRUE
oxalate degradation IV	TRUE	TRUE
palmitate biosynthesis (type I fatty acid synthase)	TRUE	TRUE
palmitate biosynthesis (type II fatty acid synthase)	TRUE	TRUE
partial TCA cycle (obligate autotrophs)	TRUE	TRUE
pentose phosphate pathway (non-oxidative branch) I	TRUE	TRUE
pentose phosphate pathway (non-oxidative branch) II	TRUE	TRUE
pentose phosphate pathway (oxidative branch) I	TRUE	TRUE
pentose phosphate pathway (partial)	TRUE	TRUE
peptidoglycan biosynthesis I (meso-diaminopimelate containing)	TRUE	TRUE
phenolphthiocerol biosynthesis	TRUE	TRUE
phenylethylamine degradation I	TRUE	TRUE
Phosphate ABC transporter	TRUE	TRUE
phosphate acquisition	TRUE	TRUE
phosphatidylinositol biosynthesis II (eukaryotes)	TRUE	TRUE
phosphatidylinositol mannoside biosynthesis	TRUE	TRUE
phosphatidylserine and phosphatidylethanolamine biosynthesis I	TRUE	TRUE
phosphopantothenate biosynthesis I	TRUE	TRUE
phthiocerol biosynthesis	TRUE	TRUE
phytol degradation	TRUE	TRUE
polyphosphate metabolism	TRUE	TRUE
ppGpp metabolism	TRUE	TRUE
progesterone biosynthesis	TRUE	TRUE
propanoate fermentation to 2-methylbutanoate	TRUE	TRUE
propanoyl-CoA degradation II	TRUE	TRUE
protein O-mannosylation II (mammals, core M1 and core M2)	TRUE	TRUE
protein Pupylation and dePupylation	TRUE	TRUE
PRPP biosynthesis	TRUE	TRUE
purine deoxyribonucleosides degradation I	TRUE	TRUE
purine deoxyribonucleosides degradation II	TRUE	TRUE
purine nucleobases degradation II (anaerobic)	TRUE	TRUE
purine ribonucleosides degradation	TRUE	TRUE
putrescine degradation I	TRUE	TRUE
putrescine degradation IV	TRUE	TRUE
putrescine degradation V	TRUE	TRUE
pyridoxal 5'-phosphate biosynthesis II	TRUE	TRUE
pyrimidine deoxyribonucleotide phosphorylation	TRUE	TRUE
pyrimidine deoxyribonucleotides de novo biosynthesis I	TRUE	TRUE
pyrimidine deoxyribonucleotides de novo biosynthesis III	TRUE	TRUE
pyrimidine deoxyribonucleotides de novo biosynthesis IV	TRUE	TRUE
pyrimidine nucleobases salvage I	TRUE	TRUE
pyruvate decarboxylation to acetyl CoA I	TRUE	TRUE
pyruvate fermentation to (R)-acetoin I	TRUE	TRUE
pyruvate fermentation to (S)-acetoin	TRUE	TRUE
pyruvate fermentation to (S)-lactate	TRUE	TRUE
pyruvate fermentation to acetate II	TRUE	TRUE
pyruvate fermentation to isobutanol (engineered)	TRUE	TRUE
pyruvate fermentation to propanoate I	TRUE	TRUE
pyruvate to cytochrome bd oxidase electron transfer	TRUE	TRUE
pyruvate to cytochrome bo oxidase electron transfer	TRUE	TRUE
queuosine biosynthesis II (queuine salvage)	TRUE	TRUE
S-adenosyl-L-methionine biosynthesis	TRUE	TRUE
S-adenosyl-L-methionine salvage II	TRUE	TRUE
S-methyl-5'-thioadenosine degradation II	TRUE	TRUE
sedoheptulose bisphosphate bypass	TRUE	TRUE
serotonin degradation	TRUE	TRUE
shikimate degradation II	TRUE	TRUE
sophorosyloxydocosanoate deacetylation	TRUE	TRUE
spermine and spermidine degradation II	TRUE	TRUE
stearate biosynthesis II (bacteria and plants)	TRUE	TRUE
stearate biosynthesis III (fungi)	TRUE	TRUE
succinate to cytochrome bd oxidase electron transfer	TRUE	TRUE
succinate to cytochrome bo oxidase electron transfer	TRUE	TRUE
succinoglycan biosynthesis	TRUE	TRUE
sulfate activation for sulfonation	TRUE	TRUE
sulfite oxidation IV (sulfite oxidase)	TRUE	TRUE
sulfoacetaldehyde degradation II	TRUE	TRUE
superoxide radicals degradation	TRUE	TRUE
taurine degradation I	TRUE	TRUE
taurine degradation III	TRUE	TRUE
TCA cycle I (prokaryotic)	TRUE	TRUE
TCA cycle II (plants and fungi)	TRUE	TRUE
TCA cycle IV (2-oxoglutarate decarboxylase)	TRUE	TRUE
TCA cycle V (2-oxoglutarate synthase)	TRUE	TRUE
tetrahydrofolate biosynthesis	TRUE	TRUE
tetrahydrofolate salvage from 5,10-methenyltetrahydrofolate	TRUE	TRUE
tetrapyrrole biosynthesis I (from glutamate)	TRUE	TRUE
thiamine diphosphate biosynthesis I (E. coli)	TRUE	TRUE
thiamine diphosphate biosynthesis II (Bacillus)	TRUE	TRUE
thiosulfate disproportionation IV (rhodanese)	TRUE	TRUE
Threonine biosynthis from aspartate via homoserine (gapseq)	TRUE	TRUE
trans, trans-farnesyl diphosphate biosynthesis	TRUE	TRUE
trehalose biosynthesis I	TRUE	TRUE
trehalose biosynthesis II	TRUE	TRUE
trehalose biosynthesis IV	TRUE	TRUE
trehalose biosynthesis V	TRUE	TRUE
trehalose biosynthesis VII	TRUE	TRUE
trehalose degradation I (low osmolarity)	TRUE	TRUE
trehalose degradation II (cytosolic)	TRUE	TRUE
trehalose degradation IV	TRUE	TRUE
trehalose degradation V	TRUE	TRUE
trehalose degradation VI (periplasmic)	TRUE	TRUE
trimethylamine degradation	TRUE	TRUE
tRNA charging	TRUE	TRUE
UDP-&alpha;-D-galactose biosynthesis	TRUE	TRUE
UDP-&alpha;-D-glucuronate biosynthesis (from UDP-glucose)	TRUE	TRUE
UDP-&beta;-L-arabinose biosynthesis I (from UDP-&alpha;-D-xylose)	TRUE	TRUE
UDP-N-acetyl-D-galactosamine biosynthesis I	TRUE	TRUE
UDP-N-acetyl-D-glucosamine biosynthesis I	TRUE	TRUE
UDP-N-acetyl-D-glucosamine biosynthesis II	TRUE	TRUE
UDP-N-acetylmuramoyl-pentapeptide biosynthesis I (meso-diaminopimelate containing)	TRUE	TRUE
UDP-N-acetylmuramoyl-pentapeptide biosynthesis II (lysine-containing)	TRUE	TRUE
UMP biosynthesis I	TRUE	TRUE
urea degradation I	TRUE	TRUE
urea degradation II	TRUE	TRUE
UTP and CTP de novo biosynthesis	TRUE	TRUE
valproate &beta;-oxidation	TRUE	TRUE
xylitol degradation	TRUE	TRUE
yersiniabactin biosynthesis	TRUE	TRUE

## Sheet: Online Resource 4
Online Resource 4. Presence/absence patterns of metabolic pathways in M. seymarense and M. diernohoferi, its closest relative species. GapSeq was used to determine the presence of metabolic pathways. Pathways present in at least one of the species are shown here with the presence/absence patterns where TRUE means present and FALSE means absent.
Name	M. seymarense	M. diernohoferi
(-)-dehydrodiconiferyl alcohol degradation	FALSE	TRUE
&gamma;-resorcylate degradation I	FALSE	TRUE
&gamma;-resorcylate degradation II	FALSE	TRUE
2-methylcitrate cycle II	FALSE	TRUE
4-hydroxymandelate degradation	FALSE	TRUE
Ac/N-end rule pathway	FALSE	TRUE
acetylene degradation (anaerobic)	FALSE	TRUE
acrylate degradation II	FALSE	TRUE
adenosine nucleotides degradation III	FALSE	TRUE
anthranilate degradation II (aerobic)	FALSE	TRUE
chitin deacetylation	FALSE	TRUE
curcumin degradation	FALSE	TRUE
dTDP-4-O-demethyl-&beta;-L-noviose biosynthesis	FALSE	TRUE
folate transformations II (plants)	FALSE	TRUE
folate transformations III (E. coli)	FALSE	TRUE
glyoxylate cycle	FALSE	TRUE
L-glutamate biosynthesis II	FALSE	TRUE
L-glutamate degradation X	FALSE	TRUE
L-homoserine biosynthesis	FALSE	TRUE
L-ornithine biosynthesis II	FALSE	TRUE
lipoprotein posttranslational modification	FALSE	TRUE
mandelate degradation I	FALSE	TRUE
nitrate reduction VIIIb (dissimilatory)	FALSE	TRUE
nitrite oxidation	FALSE	TRUE
nylon-6 oligomer degradation	FALSE	TRUE
oxalate degradation V	FALSE	TRUE
pinobanksin biosynthesis	FALSE	TRUE
protein O-mannosylation II (mammals, core M1 and core M2)	FALSE	TRUE
pyridoxal 5'-phosphate salvage I	FALSE	TRUE
pyruvate fermentation to (S)-lactate	FALSE	TRUE
serine racemization	FALSE	TRUE
sulfur reduction I	FALSE	TRUE
sulfur reduction II (via polysulfide)	FALSE	TRUE
TCA cycle VI (Helicobacter)	FALSE	TRUE
vancomycin resistance II	FALSE	TRUE
(S,S)-butanediol biosynthesis	TRUE	FALSE
(S,S)-butanediol degradation	TRUE	FALSE
1,3-propanediol biosynthesis (engineered)	TRUE	FALSE
2-chlorobenzoate degradation	TRUE	FALSE
adenosine nucleotides degradation II	TRUE	FALSE
anaerobic energy metabolism (invertebrates, cytosol)	TRUE	FALSE
anthranilate degradation I (aerobic)	TRUE	FALSE
arginine dependent acid resistance	TRUE	FALSE
C4 photosynthetic carbon assimilation cycle, NAD-ME type	TRUE	FALSE
cephalosporin C biosynthesis	TRUE	FALSE
cyanide degradation	TRUE	FALSE
D-galactarate degradation II	TRUE	FALSE
D-glucarate degradation II	TRUE	FALSE
ethylene glycol degradation	TRUE	FALSE
GDP-6-deoxy-D-talose biosynthesis	TRUE	FALSE
GDP-D-rhamnose biosynthesis	TRUE	FALSE
GDP-L-fucose biosynthesis I (from GDP-D-mannose)	TRUE	FALSE
gluconeogenesis I	TRUE	FALSE
glycine betaine degradation I	TRUE	FALSE
glycine betaine degradation II (mammalian)	TRUE	FALSE
glyphosate degradation II	TRUE	FALSE
guanosine nucleotides degradation I	TRUE	FALSE
guanosine nucleotides degradation II	TRUE	FALSE
guanosine nucleotides degradation III	TRUE	FALSE
hydrogen oxidation I (aerobic)	TRUE	FALSE
incomplete reductive TCA cycle	TRUE	FALSE
inosine 5'-phosphate degradation	TRUE	FALSE
L-arginine degradation IV (arginine decarboxylase/agmatine deiminase pathway)	TRUE	FALSE
L-arginine degradation X (arginine monooxygenase pathway)	TRUE	FALSE
L-carnitine degradation III	TRUE	FALSE
L-lactaldehyde degradation (anaerobic)	TRUE	FALSE
L-serine degradation	TRUE	FALSE
L-threonine degradation III (to methylglyoxal)	TRUE	FALSE
malate/L-aspartate shuttle pathway	TRUE	FALSE
meso-butanediol biosynthesis I	TRUE	FALSE
methanol oxidation to formaldehyde III	TRUE	FALSE
methylglyoxal degradation VI	TRUE	FALSE
mixed acid fermentation	TRUE	FALSE
NAD salvage (plants)	TRUE	FALSE
NAD salvage pathway III (to nicotinamide riboside)	TRUE	FALSE
nitrate reduction II (assimilatory)	TRUE	FALSE
purine nucleobases degradation II (anaerobic)	TRUE	FALSE
putrescine biosynthesis II	TRUE	FALSE
putrescine degradation IV	TRUE	FALSE
pyrimidine deoxyribonucleotides biosynthesis from CTP	TRUE	FALSE
pyruvate fermentation to (S)-acetoin	TRUE	FALSE
pyruvate fermentation to propanoate I	TRUE	FALSE
S-methyl-5'-thioadenosine degradation IV	TRUE	FALSE
shikimate degradation II	TRUE	FALSE
thiazole component of thiamine diphosphate biosynthesis II	TRUE	FALSE
(R,R)-butanediol biosynthesis	TRUE	TRUE
(R,R)-butanediol degradation	TRUE	TRUE
(S)-lactate fermentation to propanoate	TRUE	TRUE
&beta;-alanine biosynthesis I	TRUE	TRUE
&beta;-alanine biosynthesis II	TRUE	TRUE
&beta;-alanine biosynthesis III	TRUE	TRUE
&beta;-alanine biosynthesis IV	TRUE	TRUE
&beta;-alanine degradation I	TRUE	TRUE
&beta;-alanine degradation II	TRUE	TRUE
10,13-epoxy-11-methyl-octadecadienoate biosynthesis	TRUE	TRUE
2-carboxy-1,4-naphthoquinol biosynthesis	TRUE	TRUE
2-hydroxypenta-2,4-dienoate degradation	TRUE	TRUE
2-methyl-branched fatty acid &beta;-oxidation	TRUE	TRUE
2-oxoglutarate decarboxylation to succinyl-CoA	TRUE	TRUE
2-oxoisovalerate decarboxylation to isobutanoyl-CoA	TRUE	TRUE
3-(4-hydroxyphenyl)pyruvate biosynthesis	TRUE	TRUE
3-dehydroquinate biosynthesis I	TRUE	TRUE
3-hydroxybutyryl-CoA dehydrogenase	TRUE	TRUE
3-methylbutanol biosynthesis (engineered)	TRUE	TRUE
4-amino-2-methyl-5-diphosphomethylpyrimidine biosynthesis I	TRUE	TRUE
4-aminobenzoate biosynthesis	TRUE	TRUE
4-aminobutanoate degradation I	TRUE	TRUE
4-aminobutanoate degradation II	TRUE	TRUE
4-aminobutanoate degradation III	TRUE	TRUE
5-aminoimidazole ribonucleotide biosynthesis I	TRUE	TRUE
5-aminoimidazole ribonucleotide biosynthesis II	TRUE	TRUE
5-hydroxybenzimidazole biosynthesis (anaerobic)	TRUE	TRUE
8-amino-7-oxononanoate biosynthesis II	TRUE	TRUE
8-oxo-(d)GTP detoxification II	TRUE	TRUE
9-cis, 11-trans-octadecadienoyl-CoA degradation (isomerase-dependent, yeast)	TRUE	TRUE
acetaldehyde biosynthesis I	TRUE	TRUE
acetate and ATP formation from acetyl-CoA I	TRUE	TRUE
acetate conversion to acetyl-CoA	TRUE	TRUE
acetate formation from acetyl-CoA (succinate)	TRUE	TRUE
acetoin degradation	TRUE	TRUE
acetyl-CoA fermentation to butanoate clostridia	TRUE	TRUE
acrylate degradation I	TRUE	TRUE
acyl carrier protein activation	TRUE	TRUE
acyl carrier protein metabolism	TRUE	TRUE
adenine and adenosine salvage I	TRUE	TRUE
adenine and adenosine salvage III	TRUE	TRUE
adenine and adenosine salvage VI	TRUE	TRUE
adenosine deoxyribonucleotides de novo biosynthesis	TRUE	TRUE
adenosine ribonucleotides de novo biosynthesis	TRUE	TRUE
adenosylcobinamide-GDP biosynthesis from cobyrinate a,c-diamide	TRUE	TRUE
aerobic respiration (NDH-1 to cytochrome c oxidase via plastocyanin)	TRUE	TRUE
aerobic respiration in cyanobacteria (NDH-2 to cytochrome c oxidase via plastocyanin)	TRUE	TRUE
Agmatine Transport	TRUE	TRUE
alanine racemization	TRUE	TRUE
albaflavenone biosynthesis	TRUE	TRUE
alkylnitronates degradation	TRUE	TRUE
ammonia assimilation cycle II	TRUE	TRUE
androstenedione degradation I (aerobic)	TRUE	TRUE
anteiso-branched-chain fatty acid biosynthesis	TRUE	TRUE
arginine deiminase test	TRUE	TRUE
ascorbate recycling (cytosolic)	TRUE	TRUE
assimilatory sulfate reduction II	TRUE	TRUE
assimilatory sulfate reduction III	TRUE	TRUE
benzoate degradation II (aerobic and anaerobic)	TRUE	TRUE
betanidin degradation	TRUE	TRUE
biotin biosynthesis from 8-amino-7-oxononanoate I	TRUE	TRUE
biotin biosynthesis from 8-amino-7-oxononanoate II	TRUE	TRUE
bis(guanylyl molybdenum cofactor) biosynthesis	TRUE	TRUE
bis(guanylyl tungstenpterin) cofactor biosynthesis	TRUE	TRUE
cardiolipin biosynthesis I	TRUE	TRUE
cardiolipin biosynthesis III	TRUE	TRUE
cholesterol degradation to androstenedione I (cholesterol oxidase)	TRUE	TRUE
cholesterol degradation to androstenedione II (cholesterol dehydrogenase)	TRUE	TRUE
choline degradation I	TRUE	TRUE
choline degradation II	TRUE	TRUE
chorismate biosynthesis from 3-dehydroquinate	TRUE	TRUE
citronellol degradation	TRUE	TRUE
CMP phosphorylation	TRUE	TRUE
cob(II)yrinate a,c-diamide biosynthesis II (late cobalt incorporation)	TRUE	TRUE
coenzyme A biosynthesis I (prokaryotic)	TRUE	TRUE
coenzyme A biosynthesis II (eukaryotic)	TRUE	TRUE
cyclohexane-1-carboxylate degradation (anaerobic)	TRUE	TRUE
cyclopropane fatty acid (CFA) biosynthesis	TRUE	TRUE
cytochrome c biogenesis (system III type)	TRUE	TRUE
cytosolic NADPH production (yeast)	TRUE	TRUE
D-galactose degradation I (Leloir pathway)	TRUE	TRUE
D-galactose detoxification	TRUE	TRUE
D-malate degradation	TRUE	TRUE
D-xylose degradation I	TRUE	TRUE
D-xylose degradation II	TRUE	TRUE
demethylmenaquinol-4 biosynthesis	TRUE	TRUE
demethylmenaquinol-6 biosynthesis I	TRUE	TRUE
demethylmenaquinol-8 biosynthesis I	TRUE	TRUE
demethylmenaquinol-9 biosynthesis	TRUE	TRUE
dimethyl sulfoxide degradation	TRUE	TRUE
dipyrromethane cofactor biosynthesis	TRUE	TRUE
dolichol and dolichyl phosphate biosynthesis	TRUE	TRUE
dopamine degradation	TRUE	TRUE
dTDP-&beta;-L-rhamnose biosynthesis	TRUE	TRUE
dTMP de novo biosynthesis (mitochondrial)	TRUE	TRUE
ectoine biosynthesis	TRUE	TRUE
ergothioneine biosynthesis I (bacteria)	TRUE	TRUE
ergothioneine biosynthesis II (fungi)	TRUE	TRUE
ethanol degradation I	TRUE	TRUE
ethanol degradation II	TRUE	TRUE
ethanol degradation IV	TRUE	TRUE
ethanolamine utilization	TRUE	TRUE
ethene biosynthesis III (microbes)	TRUE	TRUE
ethionamide activation	TRUE	TRUE
even iso-branched-chain fatty acid biosynthesis	TRUE	TRUE
F420 Biosynthesis until 3 glutamine residues	TRUE	TRUE
factor 420 biosynthesis I (archaea)	TRUE	TRUE
factor 420 biosynthesis II (mycobacteria)	TRUE	TRUE
factor 420 polyglutamylation	TRUE	TRUE
fatty acid &beta;-oxidation I (generic)	TRUE	TRUE
fatty acid &beta;-oxidation II (plant peroxisome)	TRUE	TRUE
fatty acid &beta;-oxidation III (unsaturated, odd number)	TRUE	TRUE
fatty acid &beta;-oxidation IV (unsaturated, even number)	TRUE	TRUE
fatty acid &beta;-oxidation V (unsaturated, odd number, di-isomerase-dependent)	TRUE	TRUE
fatty acid &beta;-oxidation VI (mammalian peroxisome)	TRUE	TRUE
fatty acid &beta;-oxidation VII (yeast peroxisome)	TRUE	TRUE
fatty acid biosynthesis initiation (mitochondria)	TRUE	TRUE
fatty acid biosynthesis initiation (type I)	TRUE	TRUE
fatty acid elongation -- saturated	TRUE	TRUE
felinine and 3-methyl-3-sulfanylbutan-1-ol biosynthesis	TRUE	TRUE
Ferredoxin:NAD+ oxidoreductase	TRUE	TRUE
ferroxidase	TRUE	TRUE
flavin biosynthesis I (bacteria and plants)	TRUE	TRUE
flavin salvage	TRUE	TRUE
Folate biosynthesis from GTP and 4-aminobenzoate via dihydropterin-3-triphosphate	TRUE	TRUE
folate polyglutamylation	TRUE	TRUE
formaldehyde assimilation III (dihydroxyacetone cycle)	TRUE	TRUE
formaldehyde oxidation IV (thiol-independent)	TRUE	TRUE
formaldehyde oxidation VII (THF pathway)	TRUE	TRUE
GDP-mannose biosynthesis	TRUE	TRUE
geranyl diphosphate biosynthesis	TRUE	TRUE
geranylgeranyl diphosphate biosynthesis	TRUE	TRUE
gluconeogenesis III	TRUE	TRUE
glucosylglycerate biosynthesis I	TRUE	TRUE
glucosylglycerol biosynthesis	TRUE	TRUE
glutaminyl-tRNAgln biosynthesis via transamidation	TRUE	TRUE
glutaryl-CoA degradation	TRUE	TRUE
glycerol-3-phosphate shuttle	TRUE	TRUE
glycerol-3-phosphate to cytochrome bo oxidase electron transfer	TRUE	TRUE
glycerophosphodiester degradation	TRUE	TRUE
glycine betaine biosynthesis I (Gram-negative bacteria)	TRUE	TRUE
glycine betaine biosynthesis II (Gram-positive bacteria)	TRUE	TRUE
glycine betaine biosynthesis III (plants)	TRUE	TRUE
glycine biosynthesis I	TRUE	TRUE
glycine biosynthesis II	TRUE	TRUE
glycine biosynthesis III	TRUE	TRUE
glycine biosynthesis IV	TRUE	TRUE
glycine cleavage	TRUE	TRUE
glycogen biosynthesis III (from &alpha;-maltose 1-phosphate)	TRUE	TRUE
glycogen degradation I	TRUE	TRUE
glycogen degradation II	TRUE	TRUE
glycolysis I (from glucose 6-phosphate)	TRUE	TRUE
glycolysis II (from fructose 6-phosphate)	TRUE	TRUE
glycolysis III (from glucose)	TRUE	TRUE
guaiacol biosynthesis	TRUE	TRUE
guanine and guanosine salvage	TRUE	TRUE
guanine and guanosine salvage II	TRUE	TRUE
guanosine deoxyribonucleotides de novo biosynthesis I	TRUE	TRUE
guanosine ribonucleotides de novo biosynthesis	TRUE	TRUE
guanylyl molybdenum cofactor biosynthesis	TRUE	TRUE
heme b biosynthesis V (aerobic)	TRUE	TRUE
heterolactic fermentation	TRUE	TRUE
homocysteine and cysteine interconversion	TRUE	TRUE
homotaurine degradation	TRUE	TRUE
hydrogen sulfide biosynthesis II (mammalian)	TRUE	TRUE
hydroxymethylpyrimidine salvage	TRUE	TRUE
hypotaurine degradation	TRUE	TRUE
indole-3-acetate biosynthesis I	TRUE	TRUE
inosine-5'-phosphate biosynthesis I	TRUE	TRUE
isethionate degradation	TRUE	TRUE
isoniazid activation	TRUE	TRUE
L-alanine biosynthesis I	TRUE	TRUE
L-alanine biosynthesis II	TRUE	TRUE
L-alanine biosynthesis III	TRUE	TRUE
L-alanine degradation III	TRUE	TRUE
L-alanine degradation IV	TRUE	TRUE
L-arginine biosynthesis II (acetyl cycle)	TRUE	TRUE
L-arginine biosynthesis IV (archaea)	TRUE	TRUE
L-arginine degradation V (arginine deiminase pathway)	TRUE	TRUE
L-arginine degradation XII	TRUE	TRUE
L-arginine degradation XIII (reductive Stickland reaction)	TRUE	TRUE
L-asparagine biosynthesis I	TRUE	TRUE
L-asparagine biosynthesis III (tRNA-dependent)	TRUE	TRUE
L-asparagine degradation I	TRUE	TRUE
L-aspartate biosynthesis	TRUE	TRUE
L-aspartate degradation I	TRUE	TRUE
L-cysteine biosynthesis I	TRUE	TRUE
L-cysteine biosynthesis III (from L-homocysteine)	TRUE	TRUE
L-cysteine biosynthesis V (mycobacteria)	TRUE	TRUE
L-cysteine degradation II	TRUE	TRUE
L-galactose degradation	TRUE	TRUE
L-glutamate biosynthesis I	TRUE	TRUE
L-glutamate biosynthesis III	TRUE	TRUE
L-glutamate biosynthesis IV	TRUE	TRUE
L-glutamate biosynthesis V	TRUE	TRUE
L-glutamate degradation I	TRUE	TRUE
L-glutamate degradation II	TRUE	TRUE
L-glutamate degradation IX (via 4-aminobutanoate)	TRUE	TRUE
L-glutamine biosynthesis I	TRUE	TRUE
L-glutamine biosynthesis III	TRUE	TRUE
L-glutamine degradation I	TRUE	TRUE
L-glutamine degradation II	TRUE	TRUE
L-gulonate degradation	TRUE	TRUE
L-histidine biosynthesis	TRUE	TRUE
L-homocysteine biosynthesis	TRUE	TRUE
L-isoleucine biosynthesis I (from threonine)	TRUE	TRUE
L-isoleucine degradation I	TRUE	TRUE
L-lactaldehyde degradation (aerobic)	TRUE	TRUE
L-leucine biosynthesis	TRUE	TRUE
L-leucine degradation I	TRUE	TRUE
L-lysine biosynthesis I	TRUE	TRUE
L-lysine degradation VI	TRUE	TRUE
L-lysine degradation X	TRUE	TRUE
L-lysine degradation XI (mammalian)	TRUE	TRUE
L-malate degradation I	TRUE	TRUE
L-malate degradation II	TRUE	TRUE
L-methionine biosynthesis I	TRUE	TRUE
L-methionine biosynthesis II	TRUE	TRUE
L-methionine degradation II	TRUE	TRUE
L-ornithine biosynthesis I	TRUE	TRUE
L-phenylalanine biosynthesis I	TRUE	TRUE
L-phenylalanine degradation II (anaerobic)	TRUE	TRUE
L-phenylalanine degradation III	TRUE	TRUE
L-proline biosynthesis I (from L-glutamate)	TRUE	TRUE
L-proline biosynthesis III (from L-ornithine)	TRUE	TRUE
L-serine biosynthesis I	TRUE	TRUE
L-threonine biosynthesis	TRUE	TRUE
L-threonine degradation IV	TRUE	TRUE
L-threonine degradation V	TRUE	TRUE
L-tryptophan biosynthesis	TRUE	TRUE
L-tryptophan biosynthesis (complex)	TRUE	TRUE
L-tyrosine biosynthesis I	TRUE	TRUE
L-valine biosynthesis	TRUE	TRUE
L-valine degradation I	TRUE	TRUE
leucyl aminopeptidase test	TRUE	TRUE
linuron degradation	TRUE	TRUE
lipoate biosynthesis and incorporation I	TRUE	TRUE
long-chain fatty acid activation	TRUE	TRUE
menaquinol-10 biosynthesis	TRUE	TRUE
menaquinol-11 biosynthesis	TRUE	TRUE
menaquinol-12 biosynthesis	TRUE	TRUE
menaquinol-13 biosynthesis	TRUE	TRUE
menaquinol-4 biosynthesis I	TRUE	TRUE
menaquinol-6 biosynthesis	TRUE	TRUE
menaquinol-7 biosynthesis	TRUE	TRUE
menaquinol-8 biosynthesis	TRUE	TRUE
menaquinol-9 biosynthesis	TRUE	TRUE
methylerythritol phosphate pathway I	TRUE	TRUE
methylerythritol phosphate pathway II	TRUE	TRUE
methylglyoxal degradation V	TRUE	TRUE
methylsalicylate degradation	TRUE	TRUE
methylthiopropanoate degradation I (cleavage)	TRUE	TRUE
mitochondrial NADPH production (yeast)	TRUE	TRUE
molybdopterin biosynthesis	TRUE	TRUE
mono-trans, poly-cis decaprenyl phosphate biosynthesis	TRUE	TRUE
monoacylglycerol metabolism (yeast)	TRUE	TRUE
mycofactocin biosynthesis	TRUE	TRUE
mycolate biosynthesis	TRUE	TRUE
mycolyl-arabinogalactan-peptidoglycan complex biosynthesis	TRUE	TRUE
mycothiol biosynthesis	TRUE	TRUE
mycothiol-mediated detoxification	TRUE	TRUE
myo-inositol biosynthesis	TRUE	TRUE
N-acetylglutaminylglutamine amide biosynthesis	TRUE	TRUE
N6-L-threonylcarbamoyladenosine37-modified tRNA biosynthesis	TRUE	TRUE
NAD biosynthesis from 2-amino-3-carboxymuconate semialdehyde	TRUE	TRUE
NAD de novo biosynthesis I (from aspartate)	TRUE	TRUE
NAD phosphorylation and dephosphorylation	TRUE	TRUE
NAD phosphorylation and transhydrogenation	TRUE	TRUE
NAD salvage pathway V (PNC V cycle)	TRUE	TRUE
NAD(P)/NADPH interconversion	TRUE	TRUE
NADH repair (prokaryotes)	TRUE	TRUE
NADH to cytochrome bd oxidase electron transfer I	TRUE	TRUE
NADH to cytochrome bd oxidase electron transfer II	TRUE	TRUE
NADH to cytochrome bo oxidase electron transfer I	TRUE	TRUE
NADH to cytochrome bo oxidase electron transfer II	TRUE	TRUE
NADH:menaquinone6 oxidoreductase	TRUE	TRUE
NADP biosynthesis	TRUE	TRUE
NADPH repair (prokaryotes)	TRUE	TRUE
nitrate reduction V (assimilatory)	TRUE	TRUE
nitrate reduction VI (assimilatory)	TRUE	TRUE
nitric oxide biosynthesis I (plants)	TRUE	TRUE
nitric oxide biosynthesis II (mammals)	TRUE	TRUE
nitroethane degradation	TRUE	TRUE
nonaprenyl diphosphate biosynthesis II	TRUE	TRUE
noradrenaline and adrenaline degradation	TRUE	TRUE
octane oxidation	TRUE	TRUE
odd iso-branched-chain fatty acid biosynthesis	TRUE	TRUE
oleate &beta;-oxidation	TRUE	TRUE
oxalate degradation IV	TRUE	TRUE
palmitate biosynthesis (type I fatty acid synthase)	TRUE	TRUE
palmitate biosynthesis (type II fatty acid synthase)	TRUE	TRUE
partial TCA cycle (obligate autotrophs)	TRUE	TRUE
pentose phosphate pathway (non-oxidative branch) I	TRUE	TRUE
pentose phosphate pathway (non-oxidative branch) II	TRUE	TRUE
pentose phosphate pathway (oxidative branch) I	TRUE	TRUE
pentose phosphate pathway (partial)	TRUE	TRUE
peptidoglycan biosynthesis I (meso-diaminopimelate containing)	TRUE	TRUE
phenylethylamine degradation I	TRUE	TRUE
Phosphate ABC transporter	TRUE	TRUE
phosphate acquisition	TRUE	TRUE
phosphatidylinositol biosynthesis II (eukaryotes)	TRUE	TRUE
phosphatidylinositol mannoside biosynthesis	TRUE	TRUE
phosphatidylserine and phosphatidylethanolamine biosynthesis I	TRUE	TRUE
phytol degradation	TRUE	TRUE
polyphosphate metabolism	TRUE	TRUE
ppGpp metabolism	TRUE	TRUE
progesterone biosynthesis	TRUE	TRUE
propanoate fermentation to 2-methylbutanoate	TRUE	TRUE
propanoyl-CoA degradation II	TRUE	TRUE
protein Pupylation and dePupylation	TRUE	TRUE
PRPP biosynthesis	TRUE	TRUE
purine deoxyribonucleosides degradation I	TRUE	TRUE
purine deoxyribonucleosides degradation II	TRUE	TRUE
purine ribonucleosides degradation	TRUE	TRUE
putrescine degradation I	TRUE	TRUE
putrescine degradation V	TRUE	TRUE
pyridoxal 5'-phosphate biosynthesis II	TRUE	TRUE
pyrimidine deoxyribonucleotide phosphorylation	TRUE	TRUE
pyrimidine deoxyribonucleotides de novo biosynthesis I	TRUE	TRUE
pyrimidine deoxyribonucleotides de novo biosynthesis IV	TRUE	TRUE
pyrimidine nucleobases salvage I	TRUE	TRUE
pyruvate decarboxylation to acetyl CoA I	TRUE	TRUE
pyruvate fermentation to (R)-acetoin I	TRUE	TRUE
pyruvate fermentation to acetate II	TRUE	TRUE
pyruvate fermentation to isobutanol (engineered)	TRUE	TRUE
pyruvate to cytochrome bd oxidase electron transfer	TRUE	TRUE
pyruvate to cytochrome bo oxidase electron transfer	TRUE	TRUE
queuosine biosynthesis II (queuine salvage)	TRUE	TRUE
rosamicin biosynthesis	TRUE	TRUE
S-adenosyl-L-methionine biosynthesis	TRUE	TRUE
S-adenosyl-L-methionine salvage II	TRUE	TRUE
S-methyl-5'-thioadenosine degradation II	TRUE	TRUE
sedoheptulose bisphosphate bypass	TRUE	TRUE
seleno-amino acid biosynthesis (plants)	TRUE	TRUE
serotonin degradation	TRUE	TRUE
spermine and spermidine degradation II	TRUE	TRUE
stearate biosynthesis II (bacteria and plants)	TRUE	TRUE
stearate biosynthesis III (fungi)	TRUE	TRUE
succinate to cytochrome bd oxidase electron transfer	TRUE	TRUE
succinate to cytochrome bo oxidase electron transfer	TRUE	TRUE
succinoglycan biosynthesis	TRUE	TRUE
sulfate activation for sulfonation	TRUE	TRUE
sulfide oxidation I (to sulfur globules)	TRUE	TRUE
sulfite oxidation IV (sulfite oxidase)	TRUE	TRUE
sulfoacetaldehyde degradation I	TRUE	TRUE
sulfoacetaldehyde degradation II	TRUE	TRUE
superoxide radicals degradation	TRUE	TRUE
taurine degradation I	TRUE	TRUE
taurine degradation III	TRUE	TRUE
TCA cycle I (prokaryotic)	TRUE	TRUE
TCA cycle II (plants and fungi)	TRUE	TRUE
TCA cycle IV (2-oxoglutarate decarboxylase)	TRUE	TRUE
TCA cycle V (2-oxoglutarate synthase)	TRUE	TRUE
TCA cycle VII (acetate-producers)	TRUE	TRUE
tetracycline resistance	TRUE	TRUE
tetrahydrofolate biosynthesis	TRUE	TRUE
tetrahydrofolate salvage from 5,10-methenyltetrahydrofolate	TRUE	TRUE
tetrapyrrole biosynthesis I (from glutamate)	TRUE	TRUE
thiamine diphosphate biosynthesis I (E. coli)	TRUE	TRUE
thiamine diphosphate biosynthesis II (Bacillus)	TRUE	TRUE
thiosulfate disproportionation IV (rhodanese)	TRUE	TRUE
Threonine biosynthis from aspartate via homoserine (gapseq)	TRUE	TRUE
trans, trans-farnesyl diphosphate biosynthesis	TRUE	TRUE
trehalose biosynthesis I	TRUE	TRUE
trehalose biosynthesis II	TRUE	TRUE
trehalose biosynthesis IV	TRUE	TRUE
trehalose biosynthesis V	TRUE	TRUE
trehalose biosynthesis VII	TRUE	TRUE
trehalose degradation I (low osmolarity)	TRUE	TRUE
trehalose degradation II (cytosolic)	TRUE	TRUE
trehalose degradation IV	TRUE	TRUE
trehalose degradation V	TRUE	TRUE
trehalose degradation VI (periplasmic)	TRUE	TRUE
trimethylamine degradation	TRUE	TRUE
tRNA charging	TRUE	TRUE
UDP-&alpha;-D-galactose biosynthesis	TRUE	TRUE
UDP-&alpha;-D-glucuronate biosynthesis (from UDP-glucose)	TRUE	TRUE
UDP-&beta;-L-arabinose biosynthesis I (from UDP-&alpha;-D-xylose)	TRUE	TRUE
UDP-N-acetyl-D-galactosamine biosynthesis I	TRUE	TRUE
UDP-N-acetyl-D-galactosamine biosynthesis II	TRUE	TRUE
UDP-N-acetyl-D-glucosamine biosynthesis I	TRUE	TRUE
UDP-N-acetyl-D-glucosamine biosynthesis II	TRUE	TRUE
UDP-N-acetylmuramoyl-pentapeptide biosynthesis I (meso-diaminopimelate containing)	TRUE	TRUE
UMP biosynthesis I	TRUE	TRUE
urea degradation I	TRUE	TRUE
urea degradation II	TRUE	TRUE
UTP and CTP de novo biosynthesis	TRUE	TRUE
valproate &beta;-oxidation	TRUE	TRUE
yersiniabactin biosynthesis	TRUE	TRUE

## Sheet: Online Resource 5
Online Resource 5. Presence/absence patterns of metabolic pathways in all studied species. GapSeq was used to determine the presence of metabolic pathways. Pathways present in at least one of the species are shown here with the presence/absence patterns where TRUE means present and FALSE means absent.
Name	M. meyganense	M. stellerae	M. omidense	M. vaccae	M. diernohoferi	M. seymarense
(-)-dehydrodiconiferyl alcohol degradation	FALSE	FALSE	FALSE	FALSE	TRUE	FALSE
(R,R)-butanediol biosynthesis	FALSE	TRUE	FALSE	FALSE	TRUE	TRUE
(R,R)-butanediol degradation	FALSE	TRUE	FALSE	FALSE	TRUE	TRUE
(S,S)-butanediol biosynthesis	FALSE	FALSE	TRUE	TRUE	FALSE	TRUE
(S,S)-butanediol degradation	FALSE	FALSE	TRUE	TRUE	FALSE	TRUE
(S)-lactate fermentation to propanoate	TRUE	TRUE	TRUE	TRUE	TRUE	TRUE
&beta;-alanine biosynthesis I	TRUE	TRUE	TRUE	TRUE	TRUE	TRUE
&beta;-alanine biosynthesis II	TRUE	TRUE	TRUE	TRUE	TRUE	TRUE
&beta;-alanine biosynthesis III	TRUE	TRUE	FALSE	FALSE	TRUE	TRUE
&beta;-alanine biosynthesis IV	TRUE	TRUE	TRUE	TRUE	TRUE	TRUE
&beta;-alanine degradation I	TRUE	TRUE	TRUE	TRUE	TRUE	TRUE
&beta;-alanine degradation II	TRUE	TRUE	TRUE	TRUE	TRUE	TRUE
&gamma;-resorcylate degradation I	FALSE	TRUE	FALSE	FALSE	TRUE	FALSE
&gamma;-resorcylate degradation II	FALSE	TRUE	FALSE	FALSE	TRUE	FALSE
1-chloro-2-nitrobenzene degradation	FALSE	TRUE	FALSE	FALSE	FALSE	FALSE
1,2-propanediol biosynthesis from lactate (engineered)	FALSE	TRUE	FALSE	FALSE	FALSE	FALSE
1,2,4,5-tetrachlorobenzene degradation	FALSE	TRUE	FALSE	FALSE	FALSE	FALSE
1,3-propanediol biosynthesis (engineered)	FALSE	FALSE	FALSE	TRUE	FALSE	TRUE
10,13-epoxy-11-methyl-octadecadienoate biosynthesis	FALSE	TRUE	FALSE	FALSE	TRUE	TRUE
2-carboxy-1,4-naphthoquinol biosynthesis	TRUE	TRUE	TRUE	TRUE	TRUE	TRUE
2-chlorobenzoate degradation	FALSE	FALSE	TRUE	TRUE	FALSE	TRUE
2-hydroxypenta-2,4-dienoate degradation	TRUE	TRUE	FALSE	FALSE	TRUE	TRUE
2-methyl-branched fatty acid &beta;-oxidation	TRUE	TRUE	TRUE	TRUE	TRUE	TRUE
2-methyladeninyl adenosylcobamide biosynthesis from adenosylcobinamide-GDP	FALSE	FALSE	TRUE	TRUE	FALSE	FALSE
2-methylcitrate cycle I	FALSE	TRUE	FALSE	FALSE	FALSE	FALSE
2-methylcitrate cycle II	TRUE	FALSE	FALSE	TRUE	TRUE	FALSE
2-oxoglutarate decarboxylation to succinyl-CoA	TRUE	TRUE	TRUE	TRUE	TRUE	TRUE
2-oxoisovalerate decarboxylation to isobutanoyl-CoA	TRUE	TRUE	TRUE	TRUE	TRUE	TRUE
3-(4-hydroxyphenyl)pyruvate biosynthesis	TRUE	TRUE	TRUE	TRUE	TRUE	TRUE
3-dehydroquinate biosynthesis I	TRUE	TRUE	TRUE	TRUE	TRUE	TRUE
3-hydroxybutyryl-CoA dehydrogenase	TRUE	TRUE	TRUE	TRUE	TRUE	TRUE
3-methylbutanol biosynthesis (engineered)	TRUE	TRUE	FALSE	TRUE	TRUE	TRUE
3-oxoadipate degradation	FALSE	TRUE	FALSE	FALSE	FALSE	FALSE
3-phenylpropanoate and 3-(3-hydroxyphenyl)propanoate degradation to 2-hydroxypentadienoate	FALSE	TRUE	FALSE	FALSE	FALSE	FALSE
4-amino-2-methyl-5-diphosphomethylpyrimidine biosynthesis I	FALSE	TRUE	FALSE	FALSE	TRUE	TRUE
4-aminobenzoate biosynthesis	TRUE	TRUE	TRUE	TRUE	TRUE	TRUE
4-aminobutanoate degradation I	TRUE	TRUE	TRUE	TRUE	TRUE	TRUE
4-aminobutanoate degradation II	TRUE	TRUE	TRUE	TRUE	TRUE	TRUE
4-aminobutanoate degradation III	TRUE	TRUE	TRUE	TRUE	TRUE	TRUE
4-hydroxymandelate degradation	FALSE	TRUE	FALSE	FALSE	TRUE	FALSE
5-aminoimidazole ribonucleotide biosynthesis I	TRUE	TRUE	TRUE	TRUE	TRUE	TRUE
5-aminoimidazole ribonucleotide biosynthesis II	TRUE	TRUE	TRUE	TRUE	TRUE	TRUE
5-hydroxybenzimidazole biosynthesis (anaerobic)	FALSE	TRUE	FALSE	FALSE	TRUE	TRUE
5-hydroxybenzimidazolyl adenosylcobamide biosynthesis from adenosylcobinamide-GDP	FALSE	FALSE	TRUE	TRUE	FALSE	FALSE
5-methoxy-6-methylbenzimidazolyl adenosylcobamide biosynthesis from adenosylcobinamide-GDP	FALSE	FALSE	TRUE	TRUE	FALSE	FALSE
5-methoxybenzimidazolyl adenosylcobamide biosynthesis from adenosylcobinamide-GDP	FALSE	FALSE	TRUE	TRUE	FALSE	FALSE
5-methylbenzimidazolyl adenosylcobamide biosynthesis from adenosylcobinamide-GDP	FALSE	FALSE	TRUE	TRUE	FALSE	FALSE
8-amino-7-oxononanoate biosynthesis II	TRUE	TRUE	TRUE	TRUE	TRUE	TRUE
8-oxo-(d)GTP detoxification II	TRUE	TRUE	TRUE	TRUE	TRUE	TRUE
9-cis, 11-trans-octadecadienoyl-CoA degradation (isomerase-dependent, yeast)	TRUE	TRUE	TRUE	TRUE	TRUE	TRUE
Ac/N-end rule pathway	FALSE	FALSE	FALSE	FALSE	TRUE	FALSE
acetaldehyde biosynthesis I	TRUE	TRUE	TRUE	TRUE	TRUE	TRUE
acetate and ATP formation from acetyl-CoA I	TRUE	TRUE	TRUE	TRUE	TRUE	TRUE
acetate and ATP formation from acetyl-CoA II	FALSE	TRUE	TRUE	FALSE	FALSE	FALSE
acetate conversion to acetyl-CoA	TRUE	TRUE	TRUE	TRUE	TRUE	TRUE
acetate formation from acetyl-CoA (succinate)	TRUE	TRUE	FALSE	FALSE	TRUE	TRUE
acetoin degradation	TRUE	TRUE	TRUE	TRUE	TRUE	TRUE
acetyl-CoA fermentation to butanoate clostridia	TRUE	TRUE	FALSE	FALSE	TRUE	TRUE
acetylene degradation (anaerobic)	FALSE	FALSE	TRUE	TRUE	TRUE	FALSE
acrylate degradation I	TRUE	TRUE	TRUE	TRUE	TRUE	TRUE
acrylate degradation II	TRUE	TRUE	TRUE	TRUE	TRUE	FALSE
acyl carrier protein activation	TRUE	TRUE	TRUE	TRUE	TRUE	TRUE
acyl carrier protein metabolism	TRUE	TRUE	TRUE	TRUE	TRUE	TRUE
adenine and adenosine salvage I	TRUE	TRUE	TRUE	TRUE	TRUE	TRUE
adenine and adenosine salvage III	TRUE	TRUE	TRUE	TRUE	TRUE	TRUE
adenine and adenosine salvage VI	TRUE	TRUE	TRUE	TRUE	TRUE	TRUE
adeninyl adenosylcobamide biosynthesis from adenosylcobinamide-GDP	FALSE	FALSE	TRUE	TRUE	FALSE	FALSE
adenosine deoxyribonucleotides de novo biosynthesis	TRUE	TRUE	TRUE	TRUE	TRUE	TRUE
adenosine nucleotides degradation II	FALSE	TRUE	FALSE	FALSE	FALSE	TRUE
adenosine nucleotides degradation III	FALSE	FALSE	TRUE	TRUE	TRUE	FALSE
adenosine ribonucleotides de novo biosynthesis	TRUE	TRUE	TRUE	TRUE	TRUE	TRUE
adenosylcobalamin biosynthesis from adenosylcobinamide-GDP I	FALSE	FALSE	TRUE	TRUE	FALSE	FALSE
adenosylcobinamide-GDP biosynthesis from cobyrinate a,c-diamide	TRUE	TRUE	TRUE	TRUE	TRUE	TRUE
aerobic respiration (NDH-1 to cytochrome c oxidase via plastocyanin)	TRUE	TRUE	TRUE	TRUE	TRUE	TRUE
aerobic respiration I (cytochrome c)	TRUE	TRUE	TRUE	TRUE	FALSE	FALSE
aerobic respiration II (cytochrome c) (yeast)	TRUE	TRUE	TRUE	TRUE	FALSE	FALSE
aerobic respiration in cyanobacteria (NDH-2 to cytochrome c oxidase via plastocyanin)	TRUE	TRUE	TRUE	TRUE	TRUE	TRUE
Agmatine Transport	FALSE	TRUE	FALSE	FALSE	TRUE	TRUE
alanine racemization	TRUE	TRUE	TRUE	TRUE	TRUE	TRUE
albaflavenone biosynthesis	TRUE	TRUE	TRUE	TRUE	TRUE	TRUE
alkylnitronates degradation	TRUE	TRUE	TRUE	TRUE	TRUE	TRUE
allantoin degradation to ureidoglycolate I (urea producing)	FALSE	TRUE	FALSE	FALSE	FALSE	FALSE
ammonia assimilation cycle II	TRUE	TRUE	TRUE	TRUE	TRUE	TRUE
anaerobic energy metabolism (invertebrates, cytosol)	TRUE	TRUE	TRUE	TRUE	FALSE	TRUE
androstenedione degradation I (aerobic)	TRUE	TRUE	TRUE	TRUE	TRUE	TRUE
anteiso-branched-chain fatty acid biosynthesis	TRUE	TRUE	TRUE	TRUE	TRUE	TRUE
anthranilate degradation I (aerobic)	TRUE	TRUE	TRUE	TRUE	FALSE	TRUE
anthranilate degradation II (aerobic)	FALSE	TRUE	FALSE	TRUE	TRUE	FALSE
arginine deiminase test	TRUE	TRUE	TRUE	TRUE	TRUE	TRUE
arginine dependent acid resistance	TRUE	TRUE	TRUE	FALSE	FALSE	TRUE
ascorbate recycling (cytosolic)	FALSE	TRUE	FALSE	FALSE	TRUE	TRUE
assimilatory sulfate reduction II	TRUE	TRUE	TRUE	TRUE	TRUE	TRUE
assimilatory sulfate reduction III	TRUE	TRUE	TRUE	TRUE	TRUE	TRUE
assimilatory sulfate reduction IV	FALSE	FALSE	FALSE	TRUE	FALSE	FALSE
benzimidazolyl adenosylcobamide biosynthesis from adenosylcobinamide-GDP	FALSE	FALSE	TRUE	TRUE	FALSE	FALSE
benzoate degradation I (aerobic)	FALSE	FALSE	TRUE	TRUE	FALSE	FALSE
benzoate degradation II (aerobic and anaerobic)	TRUE	TRUE	FALSE	FALSE	TRUE	TRUE
betanidin degradation	TRUE	TRUE	TRUE	TRUE	TRUE	TRUE
betaxanthin biosynthesis	TRUE	TRUE	TRUE	FALSE	FALSE	FALSE
betaxanthin biosynthesis (via dopamine)	TRUE	TRUE	TRUE	FALSE	FALSE	FALSE
biotin biosynthesis from 8-amino-7-oxononanoate I	TRUE	TRUE	TRUE	TRUE	TRUE	TRUE
biotin biosynthesis from 8-amino-7-oxononanoate II	TRUE	TRUE	TRUE	TRUE	TRUE	TRUE
bis(guanylyl molybdenum cofactor) biosynthesis	TRUE	TRUE	TRUE	TRUE	TRUE	TRUE
bis(guanylyl tungstenpterin) cofactor biosynthesis	TRUE	TRUE	TRUE	TRUE	TRUE	TRUE
C4 photosynthetic carbon assimilation cycle, NAD-ME type	TRUE	TRUE	TRUE	TRUE	FALSE	TRUE
cadaverine biosynthesis	FALSE	FALSE	FALSE	TRUE	FALSE	FALSE
Calvin-Benson-Bassham cycle	FALSE	TRUE	FALSE	FALSE	FALSE	FALSE
cardiolipin biosynthesis I	TRUE	TRUE	TRUE	TRUE	TRUE	TRUE
cardiolipin biosynthesis III	TRUE	TRUE	TRUE	TRUE	TRUE	TRUE
cephalosporin C biosynthesis	FALSE	FALSE	TRUE	TRUE	FALSE	TRUE
chitin deacetylation	TRUE	TRUE	TRUE	TRUE	TRUE	FALSE
cholesterol degradation to androstenedione I (cholesterol oxidase)	TRUE	TRUE	TRUE	TRUE	TRUE	TRUE
cholesterol degradation to androstenedione II (cholesterol dehydrogenase)	TRUE	TRUE	TRUE	TRUE	TRUE	TRUE
choline degradation I	TRUE	TRUE	TRUE	TRUE	TRUE	TRUE
choline degradation II	TRUE	TRUE	TRUE	TRUE	TRUE	TRUE
chorismate biosynthesis from 3-dehydroquinate	TRUE	TRUE	TRUE	TRUE	TRUE	TRUE
cinnamate and 3-hydroxycinnamate degradation to 2-hydroxypentadienoate	FALSE	TRUE	FALSE	FALSE	FALSE	FALSE
citronellol degradation	TRUE	TRUE	TRUE	TRUE	TRUE	TRUE
CMP phosphorylation	TRUE	TRUE	TRUE	TRUE	TRUE	TRUE
cob(II)yrinate a,c-diamide biosynthesis II (late cobalt incorporation)	TRUE	TRUE	FALSE	TRUE	TRUE	TRUE
coenzyme A biosynthesis I (prokaryotic)	TRUE	TRUE	TRUE	TRUE	TRUE	TRUE
coenzyme A biosynthesis II (eukaryotic)	TRUE	TRUE	TRUE	TRUE	TRUE	TRUE
curcumin degradation	TRUE	TRUE	TRUE	TRUE	TRUE	FALSE
cyanide degradation	FALSE	TRUE	FALSE	TRUE	FALSE	TRUE
cyclohexane-1-carboxylate degradation (anaerobic)	TRUE	TRUE	TRUE	TRUE	TRUE	TRUE
cyclohexanol degradation	FALSE	FALSE	FALSE	TRUE	FALSE	FALSE
cyclopropane fatty acid (CFA) biosynthesis	TRUE	TRUE	TRUE	TRUE	TRUE	TRUE
cytochrome c biogenesis (system III type)	TRUE	TRUE	TRUE	TRUE	TRUE	TRUE
cytosolic NADPH production (yeast)	TRUE	TRUE	TRUE	TRUE	TRUE	TRUE
D-arabitol degradation	TRUE	TRUE	FALSE	FALSE	FALSE	FALSE
D-galactarate degradation II	FALSE	TRUE	FALSE	FALSE	FALSE	TRUE
D-galactose degradation I (Leloir pathway)	FALSE	TRUE	FALSE	FALSE	TRUE	TRUE
D-galactose detoxification	FALSE	TRUE	FALSE	FALSE	TRUE	TRUE
D-glucarate degradation II	FALSE	TRUE	FALSE	FALSE	FALSE	TRUE
D-malate degradation	TRUE	TRUE	TRUE	TRUE	TRUE	TRUE
D-threitol degradation	FALSE	TRUE	TRUE	TRUE	FALSE	FALSE
D-xylose degradation I	FALSE	TRUE	TRUE	TRUE	TRUE	TRUE
D-xylose degradation II	TRUE	TRUE	TRUE	TRUE	TRUE	TRUE
demethylmenaquinol-4 biosynthesis	TRUE	TRUE	TRUE	TRUE	TRUE	TRUE
demethylmenaquinol-6 biosynthesis I	TRUE	TRUE	TRUE	TRUE	TRUE	TRUE
demethylmenaquinol-8 biosynthesis I	TRUE	TRUE	TRUE	TRUE	TRUE	TRUE
demethylmenaquinol-9 biosynthesis	TRUE	TRUE	TRUE	TRUE	TRUE	TRUE
di-trans,poly-cis-undecaprenyl phosphate biosynthesis	TRUE	TRUE	TRUE	TRUE	FALSE	FALSE
dimethyl sulfide biosynthesis from methionine	TRUE	FALSE	FALSE	FALSE	FALSE	FALSE
dimethyl sulfoxide degradation	FALSE	FALSE	TRUE	TRUE	TRUE	TRUE
dimycocerosyl phthiocerol biosynthesis	FALSE	TRUE	FALSE	FALSE	FALSE	FALSE
diphenylamine degradation	FALSE	TRUE	FALSE	FALSE	FALSE	FALSE
dipyrromethane cofactor biosynthesis	TRUE	TRUE	TRUE	TRUE	TRUE	TRUE
dolichol and dolichyl phosphate biosynthesis	TRUE	TRUE	TRUE	TRUE	TRUE	TRUE
dopamine degradation	TRUE	TRUE	TRUE	TRUE	TRUE	TRUE
dTDP-&beta;-L-rhamnose biosynthesis	TRUE	TRUE	TRUE	TRUE	TRUE	TRUE
dTDP-4-O-demethyl-&beta;-L-noviose biosynthesis	FALSE	TRUE	FALSE	TRUE	TRUE	FALSE
dTMP de novo biosynthesis (mitochondrial)	TRUE	TRUE	TRUE	TRUE	TRUE	TRUE
ectoine biosynthesis	FALSE	FALSE	TRUE	FALSE	TRUE	TRUE
ergothioneine biosynthesis I (bacteria)	TRUE	TRUE	TRUE	TRUE	TRUE	TRUE
ergothioneine biosynthesis II (fungi)	TRUE	TRUE	TRUE	TRUE	TRUE	TRUE
erythritol degradation II	FALSE	TRUE	TRUE	TRUE	FALSE	FALSE
ethanol degradation I	TRUE	TRUE	TRUE	TRUE	TRUE	TRUE
ethanol degradation II	TRUE	TRUE	TRUE	TRUE	TRUE	TRUE
ethanol degradation IV	TRUE	TRUE	TRUE	TRUE	TRUE	TRUE
ethanolamine utilization	FALSE	FALSE	FALSE	FALSE	TRUE	TRUE
ethene biosynthesis III (microbes)	TRUE	TRUE	TRUE	TRUE	TRUE	TRUE
ethionamide activation	TRUE	TRUE	TRUE	TRUE	TRUE	TRUE
ethylene glycol degradation	FALSE	FALSE	FALSE	TRUE	FALSE	TRUE
even iso-branched-chain fatty acid biosynthesis	TRUE	TRUE	TRUE	TRUE	TRUE	TRUE
F420 Biosynthesis until 3 glutamine residues	TRUE	TRUE	TRUE	TRUE	TRUE	TRUE
factor 420 biosynthesis I (archaea)	TRUE	TRUE	TRUE	TRUE	TRUE	TRUE
factor 420 biosynthesis II (mycobacteria)	TRUE	TRUE	TRUE	TRUE	TRUE	TRUE
factor 420 polyglutamylation	TRUE	TRUE	TRUE	TRUE	TRUE	TRUE
fatty acid &beta;-oxidation I (generic)	TRUE	TRUE	TRUE	TRUE	TRUE	TRUE
fatty acid &beta;-oxidation II (plant peroxisome)	TRUE	TRUE	TRUE	TRUE	TRUE	TRUE
fatty acid &beta;-oxidation III (unsaturated, odd number)	TRUE	TRUE	TRUE	TRUE	TRUE	TRUE
fatty acid &beta;-oxidation IV (unsaturated, even number)	TRUE	TRUE	TRUE	TRUE	TRUE	TRUE
fatty acid &beta;-oxidation V (unsaturated, odd number, di-isomerase-dependent)	TRUE	TRUE	TRUE	TRUE	TRUE	TRUE
fatty acid &beta;-oxidation VI (mammalian peroxisome)	TRUE	TRUE	TRUE	TRUE	TRUE	TRUE
fatty acid &beta;-oxidation VII (yeast peroxisome)	TRUE	TRUE	TRUE	TRUE	TRUE	TRUE
fatty acid biosynthesis initiation (mitochondria)	TRUE	TRUE	TRUE	TRUE	TRUE	TRUE
fatty acid biosynthesis initiation (type I)	TRUE	TRUE	TRUE	TRUE	TRUE	TRUE
fatty acid elongation -- saturated	TRUE	TRUE	TRUE	TRUE	TRUE	TRUE
felinine and 3-methyl-3-sulfanylbutan-1-ol biosynthesis	TRUE	TRUE	TRUE	TRUE	TRUE	TRUE
Ferredoxin:NAD+ oxidoreductase	TRUE	TRUE	TRUE	TRUE	TRUE	TRUE
ferroxidase	TRUE	TRUE	TRUE	TRUE	TRUE	TRUE
flavin biosynthesis I (bacteria and plants)	TRUE	TRUE	TRUE	TRUE	TRUE	TRUE
flavin salvage	TRUE	TRUE	TRUE	TRUE	TRUE	TRUE
Folate biosynthesis from GTP and 4-aminobenzoate via dihydropterin-3-triphosphate	TRUE	TRUE	TRUE	TRUE	TRUE	TRUE
folate polyglutamylation	TRUE	TRUE	TRUE	TRUE	TRUE	TRUE
folate transformations II (plants)	TRUE	TRUE	TRUE	TRUE	TRUE	FALSE
folate transformations III (E. coli)	TRUE	TRUE	TRUE	TRUE	TRUE	FALSE
formaldehyde assimilation III (dihydroxyacetone cycle)	TRUE	TRUE	TRUE	TRUE	TRUE	TRUE
formaldehyde oxidation IV (thiol-independent)	TRUE	TRUE	TRUE	TRUE	TRUE	TRUE
formaldehyde oxidation VII (THF pathway)	TRUE	TRUE	TRUE	TRUE	TRUE	TRUE
formate oxidation to CO2	FALSE	TRUE	TRUE	TRUE	FALSE	FALSE
formate to dimethyl sulfoxide electron transfer	FALSE	FALSE	TRUE	TRUE	FALSE	FALSE
formate to trimethylamine N-oxide electron transfer	FALSE	FALSE	TRUE	TRUE	FALSE	FALSE
GDP-6-deoxy-D-talose biosynthesis	FALSE	FALSE	FALSE	TRUE	FALSE	TRUE
GDP-D-rhamnose biosynthesis	FALSE	FALSE	FALSE	TRUE	FALSE	TRUE
GDP-L-fucose biosynthesis I (from GDP-D-mannose)	FALSE	FALSE	FALSE	TRUE	FALSE	TRUE
GDP-mannose biosynthesis	TRUE	TRUE	TRUE	TRUE	TRUE	TRUE
geranyl diphosphate biosynthesis	TRUE	TRUE	TRUE	TRUE	TRUE	TRUE
geranylgeranyl diphosphate biosynthesis	TRUE	TRUE	TRUE	TRUE	TRUE	TRUE
gluconeogenesis I	FALSE	TRUE	TRUE	TRUE	FALSE	TRUE
gluconeogenesis III	TRUE	TRUE	TRUE	TRUE	TRUE	TRUE
glucosylglycerate biosynthesis I	TRUE	TRUE	TRUE	TRUE	TRUE	TRUE
glucosylglycerol biosynthesis	TRUE	TRUE	TRUE	TRUE	TRUE	TRUE
glutaminyl-tRNAgln biosynthesis via transamidation	TRUE	TRUE	TRUE	TRUE	TRUE	TRUE
glutaryl-CoA degradation	TRUE	TRUE	TRUE	TRUE	TRUE	TRUE
glutathione degradation (DUG pathway - yeast)	TRUE	TRUE	TRUE	TRUE	FALSE	FALSE
glycerol degradation II	FALSE	FALSE	TRUE	FALSE	FALSE	FALSE
glycerol-3-phosphate shuttle	TRUE	TRUE	TRUE	TRUE	TRUE	TRUE
glycerol-3-phosphate to cytochrome bo oxidase electron transfer	TRUE	TRUE	TRUE	TRUE	TRUE	TRUE
glycerophosphodiester degradation	TRUE	TRUE	TRUE	TRUE	TRUE	TRUE
glycine betaine biosynthesis I (Gram-negative bacteria)	TRUE	TRUE	TRUE	TRUE	TRUE	TRUE
glycine betaine biosynthesis II (Gram-positive bacteria)	TRUE	TRUE	TRUE	TRUE	TRUE	TRUE
glycine betaine biosynthesis III (plants)	TRUE	TRUE	TRUE	TRUE	TRUE	TRUE
glycine betaine degradation I	TRUE	TRUE	TRUE	TRUE	FALSE	TRUE
glycine betaine degradation II (mammalian)	TRUE	TRUE	TRUE	TRUE	FALSE	TRUE
glycine biosynthesis I	TRUE	TRUE	TRUE	TRUE	TRUE	TRUE
glycine biosynthesis II	TRUE	TRUE	TRUE	TRUE	TRUE	TRUE
glycine biosynthesis III	TRUE	TRUE	TRUE	TRUE	TRUE	TRUE
glycine biosynthesis IV	TRUE	TRUE	TRUE	TRUE	TRUE	TRUE
glycine cleavage	TRUE	TRUE	TRUE	TRUE	TRUE	TRUE
glycogen biosynthesis III (from &alpha;-maltose 1-phosphate)	TRUE	TRUE	TRUE	TRUE	TRUE	TRUE
glycogen degradation I	TRUE	TRUE	TRUE	TRUE	TRUE	TRUE
glycogen degradation II	TRUE	TRUE	TRUE	TRUE	TRUE	TRUE
glycolate and glyoxylate degradation I	FALSE	TRUE	FALSE	FALSE	FALSE	FALSE
glycolysis I (from glucose 6-phosphate)	TRUE	TRUE	TRUE	TRUE	TRUE	TRUE
glycolysis II (from fructose 6-phosphate)	TRUE	TRUE	TRUE	TRUE	TRUE	TRUE
glycolysis III (from glucose)	TRUE	TRUE	TRUE	TRUE	TRUE	TRUE
glyoxylate cycle	TRUE	TRUE	TRUE	TRUE	TRUE	FALSE
glyphosate degradation II	TRUE	FALSE	FALSE	TRUE	FALSE	TRUE
guaiacol biosynthesis	TRUE	TRUE	TRUE	TRUE	TRUE	TRUE
guanine and guanosine salvage	TRUE	TRUE	TRUE	TRUE	TRUE	TRUE
guanine and guanosine salvage II	TRUE	TRUE	TRUE	TRUE	TRUE	TRUE
guanosine deoxyribonucleotides de novo biosynthesis I	TRUE	TRUE	TRUE	TRUE	TRUE	TRUE
guanosine nucleotides degradation I	FALSE	TRUE	FALSE	FALSE	FALSE	TRUE
guanosine nucleotides degradation II	FALSE	TRUE	FALSE	FALSE	FALSE	TRUE
guanosine nucleotides degradation III	FALSE	TRUE	FALSE	FALSE	FALSE	TRUE
guanosine ribonucleotides de novo biosynthesis	TRUE	TRUE	TRUE	TRUE	TRUE	TRUE
guanylyl molybdenum cofactor biosynthesis	TRUE	TRUE	TRUE	TRUE	TRUE	TRUE
heme b biosynthesis V (aerobic)	TRUE	TRUE	FALSE	TRUE	TRUE	TRUE
heterolactic fermentation	TRUE	TRUE	TRUE	TRUE	TRUE	TRUE
homocysteine and cysteine interconversion	TRUE	TRUE	FALSE	TRUE	TRUE	TRUE
homotaurine degradation	TRUE	TRUE	TRUE	TRUE	TRUE	TRUE
hydrogen oxidation I (aerobic)	FALSE	TRUE	FALSE	FALSE	FALSE	TRUE
hydrogen production I	FALSE	TRUE	FALSE	FALSE	FALSE	FALSE
hydrogen sulfide biosynthesis II (mammalian)	TRUE	TRUE	FALSE	TRUE	TRUE	TRUE
hydroxymethylpyrimidine salvage	TRUE	TRUE	TRUE	TRUE	TRUE	TRUE
hypotaurine degradation	TRUE	TRUE	TRUE	TRUE	TRUE	TRUE
incomplete reductive TCA cycle	TRUE	TRUE	TRUE	TRUE	FALSE	TRUE
indigo biosynthesis	FALSE	TRUE	TRUE	TRUE	FALSE	FALSE
indole-3-acetate biosynthesis I	FALSE	FALSE	TRUE	TRUE	TRUE	TRUE
indole-3-acetate biosynthesis V (bacteria and fungi)	FALSE	FALSE	FALSE	TRUE	FALSE	FALSE
inosine 5'-phosphate degradation	FALSE	TRUE	FALSE	FALSE	FALSE	TRUE
inosine-5'-phosphate biosynthesis I	TRUE	TRUE	TRUE	TRUE	TRUE	TRUE
isethionate degradation	TRUE	TRUE	TRUE	TRUE	TRUE	TRUE
isoniazid activation	TRUE	TRUE	TRUE	TRUE	TRUE	TRUE
isopropylamine degradation	FALSE	TRUE	FALSE	FALSE	FALSE	FALSE
L-alanine biosynthesis I	TRUE	TRUE	TRUE	TRUE	TRUE	TRUE
L-alanine biosynthesis II	TRUE	TRUE	TRUE	TRUE	TRUE	TRUE
L-alanine biosynthesis III	TRUE	TRUE	TRUE	TRUE	TRUE	TRUE
L-alanine degradation III	TRUE	TRUE	TRUE	TRUE	TRUE	TRUE
L-alanine degradation IV	TRUE	TRUE	FALSE	TRUE	TRUE	TRUE
L-arabinose degradation II	FALSE	TRUE	TRUE	TRUE	FALSE	FALSE
L-arginine biosynthesis II (acetyl cycle)	TRUE	TRUE	TRUE	TRUE	TRUE	TRUE
L-arginine biosynthesis IV (archaea)	TRUE	TRUE	TRUE	TRUE	TRUE	TRUE
L-arginine degradation III (arginine decarboxylase/agmatinase pathway)	TRUE	TRUE	TRUE	FALSE	FALSE	FALSE
L-arginine degradation IV (arginine decarboxylase/agmatine deiminase pathway)	FALSE	FALSE	FALSE	FALSE	FALSE	TRUE
L-arginine degradation V (arginine deiminase pathway)	TRUE	TRUE	TRUE	TRUE	TRUE	TRUE
L-arginine degradation X (arginine monooxygenase pathway)	TRUE	TRUE	TRUE	FALSE	FALSE	TRUE
L-arginine degradation XII	FALSE	TRUE	TRUE	TRUE	TRUE	TRUE
L-arginine degradation XIII (reductive Stickland reaction)	TRUE	TRUE	TRUE	TRUE	TRUE	TRUE
L-asparagine biosynthesis I	TRUE	TRUE	TRUE	TRUE	TRUE	TRUE
L-asparagine biosynthesis III (tRNA-dependent)	TRUE	TRUE	TRUE	TRUE	TRUE	TRUE
L-asparagine degradation I	TRUE	TRUE	TRUE	TRUE	TRUE	TRUE
L-aspartate biosynthesis	TRUE	TRUE	TRUE	TRUE	TRUE	TRUE
L-aspartate degradation I	TRUE	TRUE	TRUE	TRUE	TRUE	TRUE
L-carnitine degradation III	FALSE	FALSE	FALSE	FALSE	FALSE	TRUE
L-citrulline degradation	FALSE	TRUE	FALSE	FALSE	FALSE	FALSE
L-cysteine biosynthesis I	FALSE	FALSE	FALSE	FALSE	TRUE	TRUE
L-cysteine biosynthesis III (from L-homocysteine)	TRUE	TRUE	FALSE	TRUE	TRUE	TRUE
L-cysteine biosynthesis IX (Trichomonas vaginalis)	TRUE	FALSE	FALSE	FALSE	FALSE	FALSE
L-cysteine biosynthesis V (mycobacteria)	TRUE	TRUE	TRUE	TRUE	TRUE	TRUE
L-cysteine degradation II	TRUE	TRUE	TRUE	TRUE	TRUE	TRUE
L-galactose degradation	TRUE	TRUE	TRUE	TRUE	TRUE	TRUE
L-glutamate biosynthesis I	TRUE	TRUE	TRUE	TRUE	TRUE	TRUE
L-glutamate biosynthesis II	FALSE	FALSE	TRUE	TRUE	TRUE	FALSE
L-glutamate biosynthesis III	TRUE	TRUE	TRUE	TRUE	TRUE	TRUE
L-glutamate biosynthesis IV	TRUE	TRUE	TRUE	TRUE	TRUE	TRUE
L-glutamate biosynthesis V	TRUE	TRUE	TRUE	TRUE	TRUE	TRUE
L-glutamate degradation I	TRUE	TRUE	TRUE	TRUE	TRUE	TRUE
L-glutamate degradation II	TRUE	TRUE	TRUE	TRUE	TRUE	TRUE
L-glutamate degradation IX (via 4-aminobutanoate)	TRUE	TRUE	TRUE	TRUE	TRUE	TRUE
L-glutamate degradation X	FALSE	FALSE	TRUE	TRUE	TRUE	FALSE
L-glutamine biosynthesis I	TRUE	TRUE	TRUE	TRUE	TRUE	TRUE
L-glutamine biosynthesis III	TRUE	TRUE	FALSE	TRUE	TRUE	TRUE
L-glutamine degradation I	TRUE	TRUE	TRUE	TRUE	TRUE	TRUE
L-glutamine degradation II	TRUE	TRUE	TRUE	TRUE	TRUE	TRUE
L-gulonate degradation	TRUE	TRUE	TRUE	TRUE	TRUE	TRUE
L-histidine biosynthesis	TRUE	TRUE	TRUE	TRUE	TRUE	TRUE
L-histidine degradation II	FALSE	TRUE	FALSE	FALSE	FALSE	FALSE
L-histidine degradation VI	FALSE	TRUE	FALSE	FALSE	FALSE	FALSE
L-homocysteine biosynthesis	TRUE	TRUE	FALSE	TRUE	TRUE	TRUE
L-homoserine biosynthesis	TRUE	TRUE	TRUE	TRUE	TRUE	FALSE
L-isoleucine biosynthesis I (from threonine)	TRUE	TRUE	TRUE	TRUE	TRUE	TRUE
L-isoleucine degradation I	TRUE	TRUE	TRUE	TRUE	TRUE	TRUE
L-lactaldehyde degradation (aerobic)	TRUE	TRUE	TRUE	TRUE	TRUE	TRUE
L-lactaldehyde degradation (anaerobic)	FALSE	FALSE	FALSE	TRUE	FALSE	TRUE
L-leucine biosynthesis	TRUE	TRUE	TRUE	TRUE	TRUE	TRUE
L-leucine degradation I	TRUE	TRUE	TRUE	TRUE	TRUE	TRUE
L-lysine biosynthesis I	TRUE	TRUE	TRUE	TRUE	TRUE	TRUE
L-lysine degradation IV	TRUE	TRUE	FALSE	FALSE	FALSE	FALSE
L-lysine degradation VI	TRUE	TRUE	TRUE	TRUE	TRUE	TRUE
L-lysine degradation X	TRUE	TRUE	TRUE	TRUE	TRUE	TRUE
L-lysine degradation XI (mammalian)	TRUE	TRUE	TRUE	TRUE	TRUE	TRUE
L-malate degradation I	TRUE	TRUE	TRUE	TRUE	TRUE	TRUE
L-malate degradation II	TRUE	TRUE	TRUE	TRUE	TRUE	TRUE
L-methionine biosynthesis I	TRUE	TRUE	FALSE	TRUE	TRUE	TRUE
L-methionine biosynthesis II	TRUE	TRUE	TRUE	TRUE	TRUE	TRUE
L-methionine degradation II	TRUE	TRUE	TRUE	TRUE	TRUE	TRUE
L-methionine salvage from L-homocysteine	FALSE	TRUE	FALSE	FALSE	FALSE	FALSE
L-ornithine biosynthesis I	TRUE	TRUE	TRUE	TRUE	TRUE	TRUE
L-ornithine biosynthesis II	FALSE	FALSE	FALSE	TRUE	TRUE	FALSE
L-phenylalanine biosynthesis I	TRUE	TRUE	TRUE	TRUE	TRUE	TRUE
L-phenylalanine degradation II (anaerobic)	TRUE	TRUE	TRUE	TRUE	TRUE	TRUE
L-phenylalanine degradation III	TRUE	TRUE	TRUE	TRUE	TRUE	TRUE
L-proline biosynthesis I (from L-glutamate)	TRUE	TRUE	FALSE	TRUE	TRUE	TRUE
L-proline biosynthesis III (from L-ornithine)	TRUE	TRUE	TRUE	TRUE	TRUE	TRUE
L-selenocysteine biosynthesis I (bacteria)	FALSE	FALSE	TRUE	TRUE	FALSE	FALSE
L-serine biosynthesis I	TRUE	TRUE	TRUE	TRUE	TRUE	TRUE
L-serine degradation	TRUE	TRUE	TRUE	TRUE	FALSE	TRUE
L-threitol degradation	FALSE	FALSE	TRUE	FALSE	FALSE	FALSE
L-threonine biosynthesis	TRUE	TRUE	TRUE	TRUE	TRUE	TRUE
L-threonine degradation II	FALSE	FALSE	FALSE	TRUE	FALSE	FALSE
L-threonine degradation III (to methylglyoxal)	FALSE	FALSE	FALSE	TRUE	FALSE	TRUE
L-threonine degradation IV	TRUE	TRUE	TRUE	TRUE	TRUE	TRUE
L-threonine degradation V	TRUE	TRUE	TRUE	TRUE	TRUE	TRUE
L-tryptophan biosynthesis	TRUE	TRUE	FALSE	TRUE	TRUE	TRUE
L-tryptophan biosynthesis (complex)	TRUE	TRUE	TRUE	TRUE	TRUE	TRUE
L-tyrosine biosynthesis I	TRUE	TRUE	TRUE	TRUE	TRUE	TRUE
L-valine biosynthesis	TRUE	TRUE	TRUE	TRUE	TRUE	TRUE
L-valine degradation I	TRUE	TRUE	TRUE	TRUE	TRUE	TRUE
leucyl aminopeptidase test	TRUE	TRUE	TRUE	TRUE	TRUE	TRUE
linezolid resistance	FALSE	FALSE	TRUE	FALSE	FALSE	FALSE
linuron degradation	FALSE	TRUE	TRUE	TRUE	TRUE	TRUE
lipoate biosynthesis and incorporation I	TRUE	TRUE	TRUE	TRUE	TRUE	TRUE
lipoprotein posttranslational modification	FALSE	FALSE	FALSE	FALSE	TRUE	FALSE
long-chain fatty acid activation	TRUE	TRUE	TRUE	TRUE	TRUE	TRUE
malate/L-aspartate shuttle pathway	TRUE	TRUE	TRUE	TRUE	FALSE	TRUE
mandelate degradation I	FALSE	TRUE	FALSE	TRUE	TRUE	FALSE
melibiose degradation	FALSE	TRUE	FALSE	FALSE	FALSE	FALSE
menaquinol-10 biosynthesis	TRUE	TRUE	TRUE	TRUE	TRUE	TRUE
menaquinol-11 biosynthesis	TRUE	TRUE	TRUE	TRUE	TRUE	TRUE
menaquinol-12 biosynthesis	TRUE	TRUE	TRUE	TRUE	TRUE	TRUE
menaquinol-13 biosynthesis	TRUE	TRUE	TRUE	TRUE	TRUE	TRUE
menaquinol-4 biosynthesis I	TRUE	TRUE	TRUE	TRUE	TRUE	TRUE
menaquinol-6 biosynthesis	TRUE	TRUE	TRUE	TRUE	TRUE	TRUE
menaquinol-7 biosynthesis	TRUE	TRUE	TRUE	TRUE	TRUE	TRUE
menaquinol-8 biosynthesis	TRUE	TRUE	TRUE	TRUE	TRUE	TRUE
menaquinol-9 biosynthesis	TRUE	TRUE	TRUE	TRUE	TRUE	TRUE
meso-butanediol biosynthesis I	FALSE	FALSE	TRUE	TRUE	FALSE	TRUE
methane oxidation to methanol I	FALSE	TRUE	FALSE	FALSE	FALSE	FALSE
methanol oxidation to formaldehyde III	FALSE	FALSE	FALSE	FALSE	FALSE	TRUE
methylamine degradation II	TRUE	FALSE	FALSE	FALSE	FALSE	FALSE
methylerythritol phosphate pathway I	TRUE	TRUE	TRUE	TRUE	TRUE	TRUE
methylerythritol phosphate pathway II	TRUE	TRUE	TRUE	TRUE	TRUE	TRUE
methylglyoxal degradation V	TRUE	TRUE	TRUE	TRUE	TRUE	TRUE
methylglyoxal degradation VI	FALSE	FALSE	FALSE	TRUE	FALSE	TRUE
methylsalicylate degradation	TRUE	TRUE	TRUE	TRUE	TRUE	TRUE
methylthiopropanoate degradation I (cleavage)	TRUE	TRUE	TRUE	TRUE	TRUE	TRUE
methymycin, neomethymycin and novamethymycin biosynthesis	FALSE	FALSE	FALSE	TRUE	FALSE	FALSE
mitochondrial NADPH production (yeast)	TRUE	TRUE	TRUE	TRUE	TRUE	TRUE
mixed acid fermentation	TRUE	TRUE	FALSE	TRUE	FALSE	TRUE
molybdopterin biosynthesis	TRUE	TRUE	FALSE	FALSE	TRUE	TRUE
mono-trans, poly-cis decaprenyl phosphate biosynthesis	TRUE	TRUE	TRUE	TRUE	TRUE	TRUE
monoacylglycerol metabolism (yeast)	TRUE	TRUE	TRUE	TRUE	TRUE	TRUE
mycofactocin biosynthesis	TRUE	TRUE	TRUE	TRUE	TRUE	TRUE
mycolate biosynthesis	TRUE	TRUE	TRUE	TRUE	TRUE	TRUE
mycolyl-arabinogalactan-peptidoglycan complex biosynthesis	TRUE	TRUE	TRUE	TRUE	TRUE	TRUE
mycothiol biosynthesis	TRUE	TRUE	TRUE	TRUE	TRUE	TRUE
mycothiol-mediated detoxification	TRUE	TRUE	TRUE	TRUE	TRUE	TRUE
myo-inositol biosynthesis	TRUE	TRUE	TRUE	TRUE	TRUE	TRUE
N-acetylglutaminylglutamine amide biosynthesis	TRUE	TRUE	TRUE	TRUE	TRUE	TRUE
N6-L-threonylcarbamoyladenosine37-modified tRNA biosynthesis	TRUE	TRUE	TRUE	TRUE	TRUE	TRUE
NAD biosynthesis from 2-amino-3-carboxymuconate semialdehyde	TRUE	TRUE	TRUE	TRUE	TRUE	TRUE
NAD de novo biosynthesis I (from aspartate)	TRUE	TRUE	TRUE	TRUE	TRUE	TRUE
NAD phosphorylation and dephosphorylation	TRUE	TRUE	TRUE	TRUE	TRUE	TRUE
NAD phosphorylation and transhydrogenation	TRUE	TRUE	TRUE	TRUE	TRUE	TRUE
NAD salvage (plants)	TRUE	TRUE	TRUE	TRUE	FALSE	TRUE
NAD salvage pathway II (PNC IV cycle)	TRUE	FALSE	FALSE	FALSE	FALSE	FALSE
NAD salvage pathway III (to nicotinamide riboside)	TRUE	TRUE	TRUE	TRUE	FALSE	TRUE
NAD salvage pathway V (PNC V cycle)	TRUE	TRUE	TRUE	TRUE	TRUE	TRUE
NAD(P)/NADPH interconversion	TRUE	TRUE	TRUE	TRUE	TRUE	TRUE
NADH repair (prokaryotes)	TRUE	TRUE	TRUE	TRUE	TRUE	TRUE
NADH to cytochrome bd oxidase electron transfer I	TRUE	TRUE	TRUE	TRUE	TRUE	TRUE
NADH to cytochrome bd oxidase electron transfer II	TRUE	TRUE	TRUE	TRUE	TRUE	TRUE
NADH to cytochrome bo oxidase electron transfer I	TRUE	TRUE	TRUE	TRUE	TRUE	TRUE
NADH to cytochrome bo oxidase electron transfer II	TRUE	TRUE	TRUE	TRUE	TRUE	TRUE
NADH:menaquinone6 oxidoreductase	TRUE	TRUE	TRUE	TRUE	TRUE	TRUE
NADP biosynthesis	TRUE	TRUE	TRUE	TRUE	TRUE	TRUE
NADPH repair (prokaryotes)	TRUE	TRUE	TRUE	TRUE	TRUE	TRUE
narbomycin, pikromycin and novapikromycin biosynthesis	FALSE	FALSE	FALSE	TRUE	FALSE	FALSE
neurosporene biosynthesis	FALSE	TRUE	FALSE	FALSE	FALSE	FALSE
nitrate reduction II (assimilatory)	FALSE	TRUE	TRUE	TRUE	FALSE	TRUE
nitrate reduction III (dissimilatory)	FALSE	FALSE	TRUE	TRUE	FALSE	FALSE
nitrate reduction V (assimilatory)	TRUE	TRUE	TRUE	TRUE	TRUE	TRUE
nitrate reduction VI (assimilatory)	TRUE	TRUE	TRUE	TRUE	TRUE	TRUE
nitrate reduction VIIIb (dissimilatory)	FALSE	FALSE	TRUE	TRUE	TRUE	FALSE
nitric oxide biosynthesis I (plants)	TRUE	TRUE	TRUE	TRUE	TRUE	TRUE
nitric oxide biosynthesis II (mammals)	TRUE	TRUE	TRUE	TRUE	TRUE	TRUE
nitrite oxidation	FALSE	FALSE	TRUE	TRUE	TRUE	FALSE
nitrobenzene degradation II	FALSE	TRUE	FALSE	FALSE	FALSE	FALSE
nitroethane degradation	TRUE	TRUE	TRUE	FALSE	TRUE	TRUE
nonaprenyl diphosphate biosynthesis II	TRUE	TRUE	TRUE	TRUE	TRUE	TRUE
noradrenaline and adrenaline degradation	TRUE	TRUE	TRUE	TRUE	TRUE	TRUE
nylon-6 oligomer degradation	TRUE	TRUE	TRUE	TRUE	TRUE	FALSE
octane oxidation	TRUE	TRUE	TRUE	TRUE	TRUE	TRUE
odd iso-branched-chain fatty acid biosynthesis	TRUE	TRUE	TRUE	TRUE	TRUE	TRUE
oleate &beta;-oxidation	TRUE	TRUE	TRUE	TRUE	TRUE	TRUE
oleate biosynthesis II (animals and fungi)	FALSE	TRUE	TRUE	TRUE	FALSE	FALSE
oxalate degradation II	FALSE	TRUE	FALSE	FALSE	FALSE	FALSE
oxalate degradation III	FALSE	TRUE	FALSE	FALSE	FALSE	FALSE
oxalate degradation IV	TRUE	TRUE	TRUE	TRUE	TRUE	TRUE
oxalate degradation V	FALSE	FALSE	FALSE	FALSE	TRUE	FALSE
palmitate biosynthesis (type I fatty acid synthase)	TRUE	TRUE	TRUE	TRUE	TRUE	TRUE
palmitate biosynthesis (type II fatty acid synthase)	TRUE	TRUE	TRUE	TRUE	TRUE	TRUE
partial TCA cycle (obligate autotrophs)	TRUE	TRUE	TRUE	TRUE	TRUE	TRUE
pentose phosphate pathway (non-oxidative branch) I	TRUE	TRUE	TRUE	TRUE	TRUE	TRUE
pentose phosphate pathway (non-oxidative branch) II	TRUE	TRUE	TRUE	TRUE	TRUE	TRUE
pentose phosphate pathway (oxidative branch) I	TRUE	TRUE	TRUE	TRUE	TRUE	TRUE
pentose phosphate pathway (partial)	TRUE	TRUE	TRUE	TRUE	TRUE	TRUE
peptidoglycan biosynthesis I (meso-diaminopimelate containing)	TRUE	TRUE	TRUE	TRUE	TRUE	TRUE
phenolphthiocerol biosynthesis	FALSE	FALSE	TRUE	TRUE	FALSE	FALSE
phenylethylamine degradation I	TRUE	TRUE	TRUE	TRUE	TRUE	TRUE
Phosphate ABC transporter	TRUE	TRUE	TRUE	TRUE	TRUE	TRUE
phosphate acquisition	TRUE	TRUE	TRUE	TRUE	TRUE	TRUE
phosphatidylinositol biosynthesis II (eukaryotes)	TRUE	TRUE	TRUE	TRUE	TRUE	TRUE
phosphatidylinositol mannoside biosynthesis	TRUE	TRUE	TRUE	TRUE	TRUE	TRUE
phosphatidylserine and phosphatidylethanolamine biosynthesis I	TRUE	TRUE	TRUE	TRUE	TRUE	TRUE
phosphonoacetate degradation	FALSE	FALSE	TRUE	FALSE	FALSE	FALSE
phosphopantothenate biosynthesis I	TRUE	TRUE	TRUE	TRUE	FALSE	FALSE
phthalate degradation (aerobic)	FALSE	TRUE	TRUE	FALSE	FALSE	FALSE
phthiocerol biosynthesis	FALSE	FALSE	TRUE	TRUE	FALSE	FALSE
phytol degradation	TRUE	TRUE	TRUE	TRUE	TRUE	TRUE
pinobanksin biosynthesis	FALSE	FALSE	FALSE	TRUE	TRUE	FALSE
polyhydroxybutanoate biosynthesis	TRUE	TRUE	FALSE	FALSE	FALSE	FALSE
polymyxin A biosynthesis	FALSE	TRUE	FALSE	FALSE	FALSE	FALSE
polyphosphate metabolism	TRUE	TRUE	TRUE	TRUE	TRUE	TRUE
ppGpp metabolism	TRUE	TRUE	TRUE	TRUE	TRUE	TRUE
progesterone biosynthesis	TRUE	TRUE	TRUE	TRUE	TRUE	TRUE
propane degradation II	FALSE	TRUE	TRUE	FALSE	FALSE	FALSE
propanoate fermentation to 2-methylbutanoate	TRUE	TRUE	TRUE	TRUE	TRUE	TRUE
propanoyl-CoA degradation II	TRUE	TRUE	TRUE	TRUE	TRUE	TRUE
protein O-mannosylation II (mammals, core M1 and core M2)	TRUE	TRUE	TRUE	TRUE	TRUE	FALSE
protein Pupylation and dePupylation	TRUE	TRUE	TRUE	TRUE	TRUE	TRUE
PRPP biosynthesis	TRUE	TRUE	TRUE	TRUE	TRUE	TRUE
purine deoxyribonucleosides degradation I	TRUE	TRUE	TRUE	TRUE	TRUE	TRUE
purine deoxyribonucleosides degradation II	TRUE	TRUE	TRUE	TRUE	TRUE	TRUE
purine nucleobases degradation II (anaerobic)	FALSE	TRUE	TRUE	TRUE	FALSE	TRUE
purine ribonucleosides degradation	TRUE	TRUE	TRUE	TRUE	TRUE	TRUE
putrescine biosynthesis I	TRUE	TRUE	TRUE	FALSE	FALSE	FALSE
putrescine biosynthesis II	FALSE	FALSE	FALSE	FALSE	FALSE	TRUE
putrescine degradation I	TRUE	TRUE	TRUE	TRUE	TRUE	TRUE
putrescine degradation IV	TRUE	TRUE	TRUE	TRUE	FALSE	TRUE
putrescine degradation V	TRUE	TRUE	TRUE	TRUE	TRUE	TRUE
pyridoxal 5'-phosphate biosynthesis II	TRUE	FALSE	TRUE	TRUE	TRUE	TRUE
pyridoxal 5'-phosphate salvage I	FALSE	FALSE	FALSE	FALSE	TRUE	FALSE
pyrimidine deoxyribonucleotide phosphorylation	TRUE	TRUE	TRUE	TRUE	TRUE	TRUE
pyrimidine deoxyribonucleotides biosynthesis from CTP	TRUE	TRUE	FALSE	FALSE	FALSE	TRUE
pyrimidine deoxyribonucleotides de novo biosynthesis I	TRUE	TRUE	TRUE	TRUE	TRUE	TRUE
pyrimidine deoxyribonucleotides de novo biosynthesis III	TRUE	TRUE	TRUE	TRUE	FALSE	FALSE
pyrimidine deoxyribonucleotides de novo biosynthesis IV	TRUE	TRUE	TRUE	TRUE	TRUE	TRUE
pyrimidine nucleobases salvage I	TRUE	TRUE	TRUE	TRUE	TRUE	TRUE
pyruvate decarboxylation to acetyl CoA I	TRUE	TRUE	TRUE	TRUE	TRUE	TRUE
pyruvate fermentation to (R)-acetoin I	TRUE	TRUE	TRUE	TRUE	TRUE	TRUE
pyruvate fermentation to (S)-acetoin	FALSE	FALSE	TRUE	TRUE	FALSE	TRUE
pyruvate fermentation to (S)-lactate	FALSE	FALSE	TRUE	TRUE	TRUE	FALSE
pyruvate fermentation to acetate II	TRUE	TRUE	TRUE	TRUE	TRUE	TRUE
pyruvate fermentation to isobutanol (engineered)	TRUE	TRUE	TRUE	TRUE	TRUE	TRUE
pyruvate fermentation to propanoate I	TRUE	TRUE	TRUE	TRUE	FALSE	TRUE
pyruvate to cytochrome bd oxidase electron transfer	TRUE	TRUE	TRUE	TRUE	TRUE	TRUE
pyruvate to cytochrome bo oxidase electron transfer	TRUE	TRUE	TRUE	TRUE	TRUE	TRUE
queuosine biosynthesis II (queuine salvage)	TRUE	TRUE	TRUE	TRUE	TRUE	TRUE
resorcinol degradation	FALSE	TRUE	FALSE	FALSE	FALSE	FALSE
rosamicin biosynthesis	TRUE	TRUE	FALSE	TRUE	TRUE	TRUE
Rubisco shunt	FALSE	TRUE	FALSE	FALSE	FALSE	FALSE
S-adenosyl-L-methionine biosynthesis	TRUE	TRUE	TRUE	TRUE	TRUE	TRUE
S-adenosyl-L-methionine salvage II	TRUE	TRUE	TRUE	TRUE	TRUE	TRUE
S-methyl-5'-thioadenosine degradation II	TRUE	TRUE	TRUE	TRUE	TRUE	TRUE
S-methyl-5'-thioadenosine degradation IV	FALSE	TRUE	TRUE	FALSE	FALSE	TRUE
sedoheptulose bisphosphate bypass	TRUE	TRUE	TRUE	TRUE	TRUE	TRUE
seleno-amino acid biosynthesis (plants)	FALSE	FALSE	FALSE	FALSE	TRUE	TRUE
serine racemization	FALSE	FALSE	FALSE	FALSE	TRUE	FALSE
serotonin degradation	TRUE	TRUE	TRUE	TRUE	TRUE	TRUE
shikimate degradation II	FALSE	TRUE	TRUE	TRUE	FALSE	TRUE
siroheme biosynthesis	FALSE	FALSE	FALSE	TRUE	FALSE	FALSE
sophorosyloxydocosanoate deacetylation	FALSE	TRUE	TRUE	TRUE	FALSE	FALSE
spermine and spermidine degradation II	TRUE	TRUE	TRUE	TRUE	TRUE	TRUE
starch degradation V	TRUE	TRUE	FALSE	FALSE	FALSE	FALSE
stearate biosynthesis II (bacteria and plants)	TRUE	TRUE	TRUE	TRUE	TRUE	TRUE
stearate biosynthesis III (fungi)	TRUE	TRUE	TRUE	TRUE	TRUE	TRUE
succinate to cytochrome bd oxidase electron transfer	TRUE	TRUE	TRUE	TRUE	TRUE	TRUE
succinate to cytochrome bo oxidase electron transfer	TRUE	TRUE	TRUE	TRUE	TRUE	TRUE
succinoglycan biosynthesis	TRUE	TRUE	TRUE	TRUE	TRUE	TRUE
sulfate activation for sulfonation	TRUE	TRUE	TRUE	TRUE	TRUE	TRUE
sulfate reduction I (assimilatory)	FALSE	FALSE	FALSE	TRUE	FALSE	FALSE
sulfide oxidation I (to sulfur globules)	FALSE	TRUE	FALSE	TRUE	TRUE	TRUE
sulfite oxidation IV (sulfite oxidase)	TRUE	TRUE	TRUE	TRUE	TRUE	TRUE
sulfoacetaldehyde degradation I	TRUE	TRUE	FALSE	TRUE	TRUE	TRUE
sulfoacetaldehyde degradation II	FALSE	TRUE	TRUE	TRUE	TRUE	TRUE
sulfur reduction I	FALSE	TRUE	FALSE	FALSE	TRUE	FALSE
sulfur reduction II (via polysulfide)	FALSE	TRUE	FALSE	FALSE	TRUE	FALSE
superoxide radicals degradation	TRUE	TRUE	TRUE	TRUE	TRUE	TRUE
taurine degradation I	TRUE	TRUE	TRUE	TRUE	TRUE	TRUE
taurine degradation III	TRUE	TRUE	TRUE	TRUE	TRUE	TRUE
TCA cycle I (prokaryotic)	TRUE	TRUE	TRUE	TRUE	TRUE	TRUE
TCA cycle II (plants and fungi)	TRUE	TRUE	TRUE	TRUE	TRUE	TRUE
TCA cycle IV (2-oxoglutarate decarboxylase)	TRUE	TRUE	TRUE	TRUE	TRUE	TRUE
TCA cycle V (2-oxoglutarate synthase)	TRUE	TRUE	TRUE	TRUE	TRUE	TRUE
TCA cycle VI (Helicobacter)	FALSE	FALSE	FALSE	FALSE	TRUE	FALSE
TCA cycle VII (acetate-producers)	TRUE	TRUE	FALSE	FALSE	TRUE	TRUE
tetracycline resistance	FALSE	TRUE	FALSE	TRUE	TRUE	TRUE
tetrahydrofolate biosynthesis	TRUE	TRUE	TRUE	TRUE	TRUE	TRUE
tetrahydrofolate salvage from 5,10-methenyltetrahydrofolate	TRUE	TRUE	TRUE	TRUE	TRUE	TRUE
tetrapyrrole biosynthesis I (from glutamate)	TRUE	TRUE	TRUE	TRUE	TRUE	TRUE
thiamine diphosphate biosynthesis I (E. coli)	TRUE	TRUE	TRUE	TRUE	TRUE	TRUE
thiamine diphosphate biosynthesis II (Bacillus)	TRUE	TRUE	TRUE	TRUE	TRUE	TRUE
thiazole component of thiamine diphosphate biosynthesis II	TRUE	FALSE	FALSE	TRUE	FALSE	TRUE
thiosulfate disproportionation IV (rhodanese)	TRUE	TRUE	TRUE	TRUE	TRUE	TRUE
Threonine biosynthis from aspartate via homoserine (gapseq)	TRUE	TRUE	TRUE	TRUE	TRUE	TRUE
trans, trans-farnesyl diphosphate biosynthesis	TRUE	TRUE	TRUE	TRUE	TRUE	TRUE
trehalose biosynthesis I	TRUE	TRUE	TRUE	TRUE	TRUE	TRUE
trehalose biosynthesis II	TRUE	TRUE	TRUE	TRUE	TRUE	TRUE
trehalose biosynthesis IV	TRUE	TRUE	TRUE	TRUE	TRUE	TRUE
trehalose biosynthesis V	TRUE	TRUE	TRUE	TRUE	TRUE	TRUE
trehalose biosynthesis VII	TRUE	TRUE	TRUE	TRUE	TRUE	TRUE
trehalose degradation I (low osmolarity)	TRUE	TRUE	TRUE	TRUE	TRUE	TRUE
trehalose degradation II (cytosolic)	TRUE	TRUE	TRUE	TRUE	TRUE	TRUE
trehalose degradation IV	TRUE	TRUE	TRUE	TRUE	TRUE	TRUE
trehalose degradation V	TRUE	TRUE	TRUE	TRUE	TRUE	TRUE
trehalose degradation VI (periplasmic)	TRUE	TRUE	TRUE	TRUE	TRUE	TRUE
trimethylamine degradation	FALSE	FALSE	TRUE	TRUE	TRUE	TRUE
tRNA charging	TRUE	TRUE	TRUE	TRUE	TRUE	TRUE
UDP-&alpha;-D-galactose biosynthesis	TRUE	TRUE	TRUE	TRUE	TRUE	TRUE
UDP-&alpha;-D-galacturonate biosynthesis I (from UDP-D-glucuronate)	FALSE	FALSE	FALSE	TRUE	FALSE	FALSE
UDP-&alpha;-D-glucuronate biosynthesis (from UDP-glucose)	TRUE	TRUE	TRUE	TRUE	TRUE	TRUE
UDP-&beta;-L-arabinose biosynthesis I (from UDP-&alpha;-D-xylose)	FALSE	FALSE	TRUE	TRUE	TRUE	TRUE
UDP-N-acetyl-D-galactosamine biosynthesis I	TRUE	TRUE	TRUE	TRUE	TRUE	TRUE
UDP-N-acetyl-D-galactosamine biosynthesis II	TRUE	TRUE	FALSE	FALSE	TRUE	TRUE
UDP-N-acetyl-D-glucosamine biosynthesis I	TRUE	TRUE	TRUE	TRUE	TRUE	TRUE
UDP-N-acetyl-D-glucosamine biosynthesis II	TRUE	TRUE	TRUE	TRUE	TRUE	TRUE
UDP-N-acetylmuramoyl-pentapeptide biosynthesis I (meso-diaminopimelate containing)	TRUE	TRUE	TRUE	TRUE	TRUE	TRUE
UDP-N-acetylmuramoyl-pentapeptide biosynthesis II (lysine-containing)	TRUE	FALSE	TRUE	TRUE	FALSE	FALSE
UMP biosynthesis I	TRUE	TRUE	TRUE	TRUE	TRUE	TRUE
urea degradation I	FALSE	FALSE	TRUE	TRUE	TRUE	TRUE
urea degradation II	TRUE	TRUE	TRUE	TRUE	TRUE	TRUE
UTP and CTP de novo biosynthesis	TRUE	TRUE	TRUE	TRUE	TRUE	TRUE
valproate &beta;-oxidation	TRUE	TRUE	TRUE	TRUE	TRUE	TRUE
vanchrobactin biosynthesis	FALSE	TRUE	FALSE	FALSE	FALSE	FALSE
vancomycin resistance II	FALSE	FALSE	FALSE	FALSE	TRUE	FALSE
xylitol degradation	TRUE	TRUE	TRUE	TRUE	FALSE	FALSE
yersiniabactin biosynthesis	FALSE	TRUE	TRUE	TRUE	TRUE	TRUE
